# Supplementary material for: Heterologous expression of the cryptic mdk gene cluster and structural revision of maduralactomycin A
Source: Royal Society of Chemistry journal article supplement (doi:10.1039/d3ra05931f), 2023-01-01
Supplement: d3ra05931f1.pdf [file d3ra05931f1.pdf]

## **Supporting Information**

### **Heterologous expression of the cryptic *mdk* gene cluster and structural revision of maduralactomycin A**

## Table of Figures

|                                                                                                                                                                                                                                                                                                                                                           |    |
|-----------------------------------------------------------------------------------------------------------------------------------------------------------------------------------------------------------------------------------------------------------------------------------------------------------------------------------------------------------|----|
| <b>Figure S1.</b> Phylogenetic tree of the putative ketosynthase of the <i>mdk</i> cluster MdkA created with NaPDoS2. The red branch of the tree is the branch where MdkA was placed, all neighboring ketosynthases are associated with angucycline gene clusters. MdkA is marked with a red star. ....                                                   | 9  |
| <b>Figure S2.</b> Phylogenetic tree of the putative chain length factor (CLF) of the <i>mdk</i> cluster MdkB created with NaPDoS2. The red branch of the tree is the branch where MdkB was placed, all neighboring CLF's are associated with angucycline gene clusters. MdkB is marked with a red star. ....                                              | 10 |
| <b>Figure S3.</b> Structures of angucycline products correlating to depicted genes within the phylogenetic tree. ....                                                                                                                                                                                                                                     | 10 |
| <b>Figure S4.</b> Cblaster analysis using the <i>mdk</i> gene cluster sequence as query sequence. Five gene clusters with similar gene arrangement and identity (threshold of 30% identity) are depicted and homologous gene sequences are shown in the same color code. Annotation of genes with the respective colour code are shown at the bottom..... | 11 |
| <b>Figure S5</b> Gel chromatogram to verify the presence of the SPIRO plasmid in <i>S. albus</i> J1074.....                                                                                                                                                                                                                                               | 13 |
| <b>Figure S6.</b> Gel chromatogram to verify the presence of the mutated plasmid ( $\Delta$ acrR) in <i>S. albus</i> J1074. ....                                                                                                                                                                                                                          | 13 |
| <b>Figure S7.</b> Gel chromatogram to verify the presence of the SPIRO plasmid in <i>S. coelicolor</i> M1146....                                                                                                                                                                                                                                          | 13 |
| <b>Figure S8.</b> Verification of SPIRO plasmid in <i>S. lividans</i> TK24.....                                                                                                                                                                                                                                                                           | 13 |
| <b>Figure S9.</b> Total ion chromatogram of culture extracts of <i>S. coelicolor</i> strains carrying the <i>mdk</i> cluster obtained after treatment with different combinations of inducer (oxytetracycline and $\epsilon$ -caprolactam)...                                                                                                             | 14 |
| <b>Figure 10.</b> Total ion chromatogram of culture extracts of <i>S. lividans</i> strains carrying the <i>mdk</i> cluster obtained after treatment with different combinations of inducer (oxytetracycline and $\epsilon$ -caprolactam)...                                                                                                               | 14 |
| <b>Figure S11.</b> Total ion chromatograms (A,B) and extracted ion chromatograms (C,D) of culture extracts of <i>S. albus</i> carrying the <i>mdk</i> cluster obtained after treatment with different inducer combinations.....                                                                                                                           | 15 |
| <b>Figure S12.</b> Total ion chromatograms of cultivation experiments with different expression strains carrying the <i>mdk</i> cluster in the presence of the inducer $\epsilon$ -caprolactam. Retention time and peak with $m/z = 454.0961$ $[M+H^+]$ is marked with an arrow. ....                                                                     | 15 |
| <b>Figure S13.</b> Extracted ion chromatogram ( $m/z = 454.0961$ $[M+H^+]$ ) using LC-MS/MS data from culture extracts of different expression strains. The respective expression host and the strain carrying the <i>mdk</i> BGC are named on the right side of the chromatograms.....                                                                   | 16 |
| <b>Figure S14.</b> Extracted ion chromatogram using LC-MS/MS data from culture extracts of the expression strain <i>S. albus</i> SAS116 $\alpha$ . Searched $m/z$ values that could correspond to maduralactomycin-like core structures (A-F) are depicted on the left side of the chromatogram. ....                                                     | 16 |
| <b>Figure S15.</b> Extracted ion chromatogram ( $m/z = 454.0961$ $[M+H^+]$ ) using LC-MS/MS data retrieved from culture extracts of the expression strain <i>S. albus</i> SAS116 $\alpha$ carrying the functional <i>mdk</i> cluster, modified strain <i>Sa</i> $\Delta$ acrR_1.8 $\alpha$ and <i>S. albus</i> J1074 wildtype.....                        | 17 |
| <b>Figure S16.</b> Extracted ion chromatograms of $m/z$ values corresponding to putative maduralactomycin                                                                                                                                                                                                                                                 |    |

|                                                                                                                                                                                                                                                                                                                                                                                                                                                                                                                                                                                                                                                                                                                                                                                                                                                                        |    |
|------------------------------------------------------------------------------------------------------------------------------------------------------------------------------------------------------------------------------------------------------------------------------------------------------------------------------------------------------------------------------------------------------------------------------------------------------------------------------------------------------------------------------------------------------------------------------------------------------------------------------------------------------------------------------------------------------------------------------------------------------------------------------------------------------------------------------------------------------------------------|----|
| derivatives (A-F) that could be produced by the modified strain Sa $\Delta$ acrR. The respective $m/z$ [M+H <sup>+</sup> ] values as well as the respective structures are found in each line (A-F). .....                                                                                                                                                                                                                                                                                                                                                                                                                                                                                                                                                                                                                                                             | 17 |
| <b>Figure S17.</b> Extracted ion chromatogram of $m/z$ values corresponding to putative seongomycin derivatives (G-J) that could be produced by strain SAS116 $\alpha$ . The respective $m/z$ [M+H <sup>+</sup> ] values as well as the respective structures are found in each line (G-J) .....                                                                                                                                                                                                                                                                                                                                                                                                                                                                                                                                                                       | 18 |
| <b>Figure S18.</b> Extracted ion chromatogram of $m/z$ values corresponding to putative seongomycin derivatives that could be produced by strain Sa $\Delta$ acrR. The respective $m/z$ [M+H <sup>+</sup> ] values as well as the respective structures are found in each line (G-J) .....                                                                                                                                                                                                                                                                                                                                                                                                                                                                                                                                                                             | 18 |
| <b>Figure S19.</b> Exemplary GNPS-based network analysis of 10% MeOH SPE Fraction without self-loops. Red SAS116, Blue $\Delta$ SAS116, Green SAS WT, Orange blank. Cluster A marks the seongomycin cluster. ....                                                                                                                                                                                                                                                                                                                                                                                                                                                                                                                                                                                                                                                      | 19 |
| <b>Figure S20.</b> Preparative HPLC chromatogram of the extract containing seongomycin (left), UV absorption and HRMS spectrum of purified seongomycin (right). ....                                                                                                                                                                                                                                                                                                                                                                                                                                                                                                                                                                                                                                                                                                   | 23 |
| <b>Figure S21.</b> HR-MS/MS spectrum of enriched seongomycin fraction containing molecular ion features of seongomycin and homoseongomycin. ....                                                                                                                                                                                                                                                                                                                                                                                                                                                                                                                                                                                                                                                                                                                       | 23 |
| <b>Figure S22.</b> Overlaid <sup>1</sup> H NMR spectra of seongomycin (upper spectrum) and a mixture of seongomycin and homoseongomycin in DMSO- $d_6$ (lower spectrum). ....                                                                                                                                                                                                                                                                                                                                                                                                                                                                                                                                                                                                                                                                                          | 25 |
| <b>Figure S23.</b> <sup>1</sup> H- <sup>13</sup> C HSQC spectrum of an enriched sample containing seongomycin and homoseongomycin in DMSO- $d_6$ . ....                                                                                                                                                                                                                                                                                                                                                                                                                                                                                                                                                                                                                                                                                                                | 26 |
| <b>Figure S24.</b> Overlaid <sup>1</sup> H NMR spectra of seongomycin in DMSO- $d_6$ (lower) and DMSO- $d_6$ + 1 drop TFA- $d$ (upper).....                                                                                                                                                                                                                                                                                                                                                                                                                                                                                                                                                                                                                                                                                                                            | 27 |
| <b>Figure S25.</b> <sup>1</sup> H-NMR spectrum of seongomycin in DMSO- $d_6$ + 1 drop TFA- $d$ . ....                                                                                                                                                                                                                                                                                                                                                                                                                                                                                                                                                                                                                                                                                                                                                                  | 28 |
| <b>Figure S26.</b> <sup>1</sup> H- <sup>1</sup> H COSY spectrum of seongomycin in DMSO- $d_6$ + 1 drop TFA- $d$ . ....                                                                                                                                                                                                                                                                                                                                                                                                                                                                                                                                                                                                                                                                                                                                                 | 29 |
| <b>Figure S27.</b> <sup>1</sup> H- <sup>13</sup> C HSQC spectrum of seongomycin in DMSO- $d_6$ + 1 drop TFA- $d$ . ....                                                                                                                                                                                                                                                                                                                                                                                                                                                                                                                                                                                                                                                                                                                                                | 30 |
| <b>Figure S28.</b> <sup>1</sup> H- <sup>13</sup> C HMBC spectrum of seongomycin in DMSO- $d_6$ + 1 drop TFA- $d$ . ....                                                                                                                                                                                                                                                                                                                                                                                                                                                                                                                                                                                                                                                                                                                                                | 31 |
| <b>Figure S29.</b> Magnified <sup>1</sup> H- <sup>13</sup> C HMBC spectrum of seongomycin. ....                                                                                                                                                                                                                                                                                                                                                                                                                                                                                                                                                                                                                                                                                                                                                                        | 32 |
| <b>Figure S30.</b> <sup>1</sup> H- <sup>1</sup> H ROESY spectrum of seongomycin in DMSO- $d_6$ + 1 drop TFA- $d$ . ....                                                                                                                                                                                                                                                                                                                                                                                                                                                                                                                                                                                                                                                                                                                                                | 33 |
| <b>Figure S31.</b> Key <sup>1</sup> H- <sup>13</sup> C ROESY correlations between H-1 (7.18 ppm), H-13 (3.89 and 3.55 ppm) and H-14 (4.43 ppm), confirming the position of H-1 on the aromatic ring. ....                                                                                                                                                                                                                                                                                                                                                                                                                                                                                                                                                                                                                                                              | 34 |
| <b>Figure S32.</b> 3D representation of the observed NOE effects for seongomycin.....                                                                                                                                                                                                                                                                                                                                                                                                                                                                                                                                                                                                                                                                                                                                                                                  | 35 |
| <b>Figure S33.</b> Chemical structures (26) used to compute chemical shifts by extensive DFT calculations. ....                                                                                                                                                                                                                                                                                                                                                                                                                                                                                                                                                                                                                                                                                                                                                        | 38 |
| <b>Figure S34.</b> Reassignment of <sup>13</sup> C-labeling for revised structure of maduralactomycin. <sup>35</sup> A) 1- <sup>13</sup> C labeled maduralactomycin A: HRMS analysis showed an increase of the corresponding molecular isotope peak ( $m/z$ value) that indicated the incorporation of up to eight <sup>13</sup> C acetate units. <sup>13</sup> C NMR analysis revealed a signal enhancement of C-2, C-4, C-6, C-8, C-12, C-13, C-15 and C-17. B) 2- <sup>13</sup> C labeled maduralactomycin A: HRMS analysis showed an increase of the corresponding molecular isotope peak ( $m/z$ value) that indicated the incorporation of up to ten <sup>13</sup> C acetate units. <sup>13</sup> C NMR analysis of 1b revealed the strong signal enhancement of C-1, C-3, C-5, C-7, C-9, C-10, C-11, C-14, C-16, and C-18. C) 1,2- <sup>13</sup> C <sub>2</sub> |    |

labeled maduralactomycin A: HRMS analysis showed an increase of the corresponding molecular isotope peak ( $m/z$  value) that indicated the incorporation of up to nine or ten  $^{13}\text{C}$  acetate units.  $^1\text{H}$  NMR spectrum was identical with spectra of 1a and 1b. 2D NMR analysis of 1c allowed the assignment of the complete structure. Detailed analysis of  $^{13}\text{C}$  NMR revealed the doublet originated from the intact acetate unit, however singlet of C-1, C10, C-12 and C-14 from either rearrangement or decarboxylation. .... 46

**Figure S35.** Graphic representation of cytotoxicity of seongomycin. On the Y axis the viability of cells in % and on the X-axis the concentration of the compound is depicted. .... 52

**Figure S36.** Determination of the  $C_{50}$  of seongomycin in HuH7 and Vero E6 cells (67.4  $\mu\text{M}$  in Vero E6 cells; > 100 $\mu\text{M}$  in HuH7 5.2 cells). .... 53

**Figure S37.** Determination of antiviral activity against SARS-CoV2 or CHIKV when applied to virus-infected cells, either in pre-infection or post-infection treatment conditions. .... 54

## Table of Tables

|                                                                                                                                                                                                                                                                                                                                                                                                                                                                                                           |    |
|-----------------------------------------------------------------------------------------------------------------------------------------------------------------------------------------------------------------------------------------------------------------------------------------------------------------------------------------------------------------------------------------------------------------------------------------------------------------------------------------------------------|----|
| <b>Table S1</b> .Composition of culture media .....                                                                                                                                                                                                                                                                                                                                                                                                                                                       | 7  |
| <b>Table S2</b> . Growth conditions for strains used in this study. ....                                                                                                                                                                                                                                                                                                                                                                                                                                  | 7  |
| <b>Table S3</b> . Strains and plasmids used in this study .....                                                                                                                                                                                                                                                                                                                                                                                                                                           | 8  |
| <b>Table S4</b> . PCR primers used in this study.....                                                                                                                                                                                                                                                                                                                                                                                                                                                     | 12 |
| <b>Table S5</b> . PCR conditions used for verification of gene cluster .....                                                                                                                                                                                                                                                                                                                                                                                                                              | 12 |
| <b>Table S6</b> . Summary of GNPS nodes exclusively occurring in strain <i>S. albus</i> J1074/SAS116 $\alpha$ .....                                                                                                                                                                                                                                                                                                                                                                                       | 20 |
| <b>Table S7</b> . Summary of GNPS nodes exclusively occurring in <i>S. albus</i> Sa $\Delta$ acrR .....                                                                                                                                                                                                                                                                                                                                                                                                   | 21 |
| <b>Table S8</b> . Summary of GNPS nodes shared by SAS 116 $\alpha$ and Sa $\Delta$ acrR.....                                                                                                                                                                                                                                                                                                                                                                                                              | 22 |
| <b>Table S9</b> . NMR data for seongomycin in DMSO- $d_6$ + 1 drop TFA- $d$ and chemical structure including numberings. ....                                                                                                                                                                                                                                                                                                                                                                             | 24 |
| <b>Table S10</b> . Experimental and calculated $^1\text{H}$ and $^{13}\text{C}$ chemical shifts of seongomycin.....                                                                                                                                                                                                                                                                                                                                                                                       | 36 |
| <b>Table S11</b> . Computed and experimental $^{13}\text{C}$ chemical shift values of the revised structure of maduralactomycin A by Guo et al. DFT calculation of $^{13}\text{C}$ chemical shift values of the previously proposed structure pinpoint significant errors at the positions C-8, C-11, C-16, and C-17, indicating an incorrect assignment of the planar structure.....                                                                                                                     | 37 |
| <b>Table S12</b> . Calculated $^{13}\text{C}$ chemical shifts of the proposed structures named Madura-1 to Madura-12, ranging from the largest to smallest shifts (ppm) .....                                                                                                                                                                                                                                                                                                                             | 39 |
| <b>Table S13</b> . Calculated $^{13}\text{C}$ chemical shifts of the proposed structures Madura-13 to Madura-23, ranging from the largest to smallest shifts (ppm) .....                                                                                                                                                                                                                                                                                                                                  | 40 |
| <b>Table S14</b> . Errors between experimental and calculated chemical shifts of the proposed structures Madura-1 to Madura-12 (ppm).....                                                                                                                                                                                                                                                                                                                                                                 | 41 |
| <b>Table S15</b> . Errors between experimental and calculated chemical shifts of the proposed structures Madura-13 to Madura-23 (ppm).....                                                                                                                                                                                                                                                                                                                                                                | 42 |
| <b>Table S16</b> . Calculated $^{13}\text{C}$ chemical shifts and errors of the proposed structures Madura-23 to Madura-26, ranging from the largest to smallest shifts (ppm) and calculated errors between experimental and calculated chemical shifts of the proposed structures Madura-13 to Madura-23 (ppm). ....                                                                                                                                                                                     | 43 |
| <b>Table S17</b> . Computed and experimental $^{13}\text{C}$ chemical shift values of the revised structure of maduralactomycin A using atom numbering as stated in Tables S12-S16 of the computational approach. ....                                                                                                                                                                                                                                                                                    | 44 |
| <b>Table S18</b> . NMR Data (DMSO- $d_6$ , at 300 K) and $^1\text{H}$ - $^{13}\text{C}$ HMBC correlations (incl. long-range correlations based on modified HMBC pulse sequences) for the revised structure of maduralactomycin A. <sup>a,35</sup> .....                                                                                                                                                                                                                                                   | 45 |
| <b>Table S19</b> . Revised NMR Data (DMSO- $d_6$ , at 300 K) and $^1\text{H}$ - $^{13}\text{C}$ HMBC correlations (incl. long-range correlations based on modified HMBC pulse sequences) of $1\text{-}^{13}\text{C}$ labeled maduralactomycin A ( <b>1a</b> ). <sup>a, 35</sup> HRMS analysis showed an increase of the corresponding molecular isotope peak ( $m/z$ value) that indicated the incorporation of up to eight $^{13}\text{C}$ acetate units. $^{13}\text{C}$ NMR analysis revealed a signal |    |

|                                                                                                                                                                                                                                                                                                                                                                                                                                                                                                                                                                                                                                                                                                                                                                                                                                                                   |    |
|-------------------------------------------------------------------------------------------------------------------------------------------------------------------------------------------------------------------------------------------------------------------------------------------------------------------------------------------------------------------------------------------------------------------------------------------------------------------------------------------------------------------------------------------------------------------------------------------------------------------------------------------------------------------------------------------------------------------------------------------------------------------------------------------------------------------------------------------------------------------|----|
| enhancement of <b>C-2, C-4, C-6, C-8, C-12, C-13, C-15</b> and <b>C-17</b> . .....                                                                                                                                                                                                                                                                                                                                                                                                                                                                                                                                                                                                                                                                                                                                                                                | 47 |
| <b>Table S20.</b> Revised NMR data (DMSO- <i>d</i> <sub>6</sub> , at 300 K) and <sup>1</sup> H- <sup>13</sup> C HMBC correlations (incl. long-range correlations based on modified HMBC pulse sequences) of 2- <sup>13</sup> C labeled maduralactomycin A ( <b>1b</b> ). <sup>a,35</sup> HRMS analysis showed an increase of the corresponding molecular isotope peak ( <i>m/z</i> value) that indicated the incorporation of up to ten <sup>13</sup> C acetate units. <sup>13</sup> C NMR analysis of <b>1b</b> revealed the strong signal enhancement of <b>C-1, C-3, C-5, C-7, C-9, C-10, C-11, C-14, C-16, and C-18</b> .....                                                                                                                                                                                                                                 | 48 |
| <b>Table S21.</b> Revised NMR data (DMSO- <i>d</i> <sub>6</sub> , at 300 K) and <sup>1</sup> H- <sup>13</sup> C HMBC correlations (incl. long-range correlations based on modified HMBC pulse sequences) of 1,2- <sup>13</sup> C <sub>2</sub> labeled maduralactomycin A ( <b>1c</b> ). <sup>a</sup> HRMS analysis showed an increase of the corresponding molecular isotope peak ( <i>m/z</i> value) that indicated the incorporation of up to nine or ten <sup>13</sup> C acetate units. <sup>1</sup> H NMR spectrum was identical with spectra of <b>1a</b> and <b>1b</b> . 2D NMR analysis of <b>1c</b> allowed the assignment of the complete structure. Detailed analysis of <sup>13</sup> C NMR revealed the doublet originated from the intact acetate unit, however singlet of C-1, C10, C-12 and C-14 from either rearrangement or decarboxylation..... | 49 |
| <b>Table S22</b> Antimicrobial activity of seongomycin (1.0 mg/mL in DMSO), ciprofloxacin (5 µg/mL in aqua dest. (cip.) and amphotericin B (10 µg/mL in DMSO/MeOH (amp.) towards Gram (+) and Gram (–) bacteria and fungi. <sup>a</sup> .....                                                                                                                                                                                                                                                                                                                                                                                                                                                                                                                                                                                                                     | 50 |
| <b>Table S23</b> Minimal inhibitory contentraion (MIC) assay of seongomycin. All used substances were diluted to a concentration of 100 µg/mL. Used solvents and respective MIC of the Test stains are given in the table. All values are given in µg/mL .....                                                                                                                                                                                                                                                                                                                                                                                                                                                                                                                                                                                                    | 50 |
| <b>Table S24.</b> Used cell lines and cell culture media for cytotoxicity and proliferation assays .....                                                                                                                                                                                                                                                                                                                                                                                                                                                                                                                                                                                                                                                                                                                                                          | 52 |
| <b>Table S25.</b> Antiproliferative and cytotoxic activity test of seongomycin.....                                                                                                                                                                                                                                                                                                                                                                                                                                                                                                                                                                                                                                                                                                                                                                               | 52 |

**Table S1** .Composition of culture media

|                   |                                                                                                                                |
|-------------------|--------------------------------------------------------------------------------------------------------------------------------|
| DNPM <sup>1</sup> | 40.0 g/L Dextrin,<br>7.48 g/L pepton from soy,<br>5.0 g/L yeast extract,<br>21.0 g/L MOPS 3-(N-morpholino)propanesulfonic acid |
| ISP2 <sup>2</sup> | 4 g/L yeast extract<br>10 g/L malt extract<br>4 g/L glucose                                                                    |
| LB                | (Carl Roth, Germany)                                                                                                           |
| SOB               | (Carl Roth, Germany)                                                                                                           |
| CASO              | (Carl Roth, Germany)                                                                                                           |

**Table S2**. Growth conditions for strains used in this study.

| Strain                                                                                                      | Medium/Antibiotic                                                                                           |                                                             |
|-------------------------------------------------------------------------------------------------------------|-------------------------------------------------------------------------------------------------------------|-------------------------------------------------------------|
| <i>E. coli</i> / <i>mdk</i> BGC containing plasmid (SPIRO BGC)                                              | LB (Carl Roth, Germany),<br>+ apramycin (50 µg/mL)                                                          | 37 °C at 160 rpm                                            |
| <i>E. coli</i> /Δ <i>acrR</i> / Δ <i>KS</i> ( <i>mdk</i> BGC containing plasmid with knocked out regulator) | LB (Carl Roth, Germany),<br>+ spectinomycin (50 µg/mL)                                                      | 37 °C at 160 rpm                                            |
| <i>E. coli</i> HB101:prK2013                                                                                | LB (Carl Roth, Germany),<br>+ kanamycin (50 µg/mL)                                                          | antibiotic was added at a cultivation temperature of 30 °C. |
| <i>E. coli</i> BW25113/piJ790                                                                               | LB, SOB (Carl Roth, Germany)<br>+ chloramphenicol (25 µg/mL)                                                | 30°C, 150 rpm                                               |
| <i>E. coli</i> BW25113/piJ790/SPIRO BGC                                                                     | LB, SOB (Carl Roth, Germany)<br>+ chloramphenicol (25 µg/mL)<br>+ apramycin (50 µg/mL)                      | 30°C, 150 rpm                                               |
| <i>E. coli</i> BW25113/piJ790/SPIRO_Δ <i>acrR</i>                                                           | LB, SOB (Carl Roth, Germany)<br>+ chloramphenicol (25 µg/mL)<br>+ spectinomycin (50 µg/mL)                  | 30°C, 150 rpm                                               |
| <i>E. coli</i> ET12567 pUZ8002                                                                              | LB (Carl Roth, Germany)<br>+ kanamycin (25 µg/mL)<br>+ chloramphenicol (25 µg/mL)                           | 37 °C at 160 rpm                                            |
| <i>E. coli</i> ET12567 pUZ8002 SPIRO BGC                                                                    | LB (Carl Roth, Germany)<br>+ kanamycin (25 µg/mL)<br>+ chloramphenicol (25 µg/mL)<br>+ apramycin (50 µg/mL) | 37 °C at 160 rpm                                            |
| <i>E. coli</i> DH5α piJ778                                                                                  | LB (Carl Roth, Germany)<br>+ spectinomycin (50 µg/mL)                                                       | 37 °C at 160 rpm                                            |
| <i>Streptomyces albus</i> J1074                                                                             | CASO media (Carl Roth, Germany)                                                                             | 28°C, 140 rpm                                               |
| <i>Streptomyces coelicolor</i> M1146                                                                        | CASO media (Carl Roth, Germany)                                                                             | 28°C, 140 rpm                                               |
| <i>Streptomyces lividans</i> TK24                                                                           | CASO media (Carl Roth, Germany)                                                                             | 28°C, 140 rpm                                               |
| <i>Streptomyces albus</i> J1074 / SAS116 α                                                                  | CASO media (Carl Roth, Germany)<br>DNPM + apramycin (50 µg/mL)                                              | 28°C, 140 rpm                                               |
| <i>Streptomyces coelicolor</i> M1146/ 1.8PI                                                                 | CASO media (Carl Roth, Germany)<br>DNPM + apramycin (50 µg/mL)                                              | 28°C, 140 rpm                                               |
| <i>Streptomyces albus</i> J1074 / SaΔ <i>acrR</i>                                                           | CASO media (Carl Roth, Germany)<br>DNPM + spectinomycin (100 µg/mL)                                         | 28°C, 140 rpm                                               |
| <i>Streptomyces lividans</i> TK24 / 1.32PISL                                                                | CASO media (Carl Roth, Germany)<br>ISP2 + apramycin (50 µg/mL)                                              | 28°C, 140 rpm                                               |

**Table S3.** Strains and plasmids used in this study

| Name                                                           | Type                                                                                                           | Reference                                                              |
|----------------------------------------------------------------|----------------------------------------------------------------------------------------------------------------|------------------------------------------------------------------------|
| <i>Streptomyces albus</i> J1074                                | Wild type, heterologous host                                                                                   | 3,4                                                                    |
| <i>Streptomyces coelicolor</i> M1146                           | Wild type, heterologous host                                                                                   | 5                                                                      |
| <i>Streptomyces lividans</i> TK24                              | Wild type, heterologous host                                                                                   | 6                                                                      |
| SPIRO Plasmid                                                  | <i>mdk</i> containing pDualP vector:<br>Plasmid carrying the putative <i>mdk</i> cluster                       | Varigen Biosciences<br>Now: Terra Bioforge: Synthetic Biology Platform |
| SPIRO_ΔacrR                                                    | Plasmid carrying the putative <i>mdk</i> cluster with knocked out regulators                                   | This study                                                             |
| <i>Streptomyces albus</i> SAS116a                              | <i>Streptomyces albus</i> J1074 carrying the SPIRO plasmid                                                     | This study                                                             |
| <i>Streptomyces coelicolor</i> 1.8PI                           | <i>Streptomyces coelicolor</i> M1146 carrying the SPIRO plasmid                                                | This study                                                             |
| <i>Streptomyces lividans</i> 1.32PISL                          | <i>Streptomyces lividans</i> TK24 carrying the SPIRO plasmid                                                   | This study                                                             |
| <i>E. coli</i> HB101:prK2013                                   | <i>E. coli</i> carrying plasmid for conjugative transfer in triparental conjugation                            | 7,8                                                                    |
| <i>E. coli</i> ET12567 pUZ8002                                 | <i>E. coli</i> for methylation free conjugative transfer                                                       | 9,10                                                                   |
| <i>E. coli</i> ET12567 pUZ8002 SPIRO BGC                       | <i>E. coli</i> for methylation free conjugative transfer carrying the SPIRO plasmid                            | This study                                                             |
| <i>E. coli</i> / <i>mdk</i> BGC containing plasmid (SPIRO BGC) | <i>E. coli</i> Bact.Opt. 2.0 carrying the SPIRO plasmid                                                        | Varigen Biosciences                                                    |
| <i>E. coli</i> DH5α pIJ778                                     | <i>E. coli</i> carrying the Spectinomycin resistance                                                           | 11                                                                     |
| <i>E. coli</i> BW25113/piJ790                                  | <i>E. coli</i> carrying the Plasmid for λ Red recombination                                                    | 12,13                                                                  |
| <i>E. coli</i> BW25113/piJ790/SPIRO BGC                        | <i>E. coli</i> carrying the Plasmid for λ Red recombination and the SPIRO plasmid (for recombination reaction) | This study                                                             |
| <i>E. coli</i> BW25113/piJ790/SPIRO_ΔacrR                      | <i>E. coli</i> carrying the mutated SPIRO plasmid (knockout of regulators)                                     | This study                                                             |
| <i>E. coli</i> BW25113/piJ790/SPIRO_ΔKS                        | <i>E. coli</i> carrying the mutated SPIRO plasmid (knockout of Ketosynthase)                                   | This study                                                             |



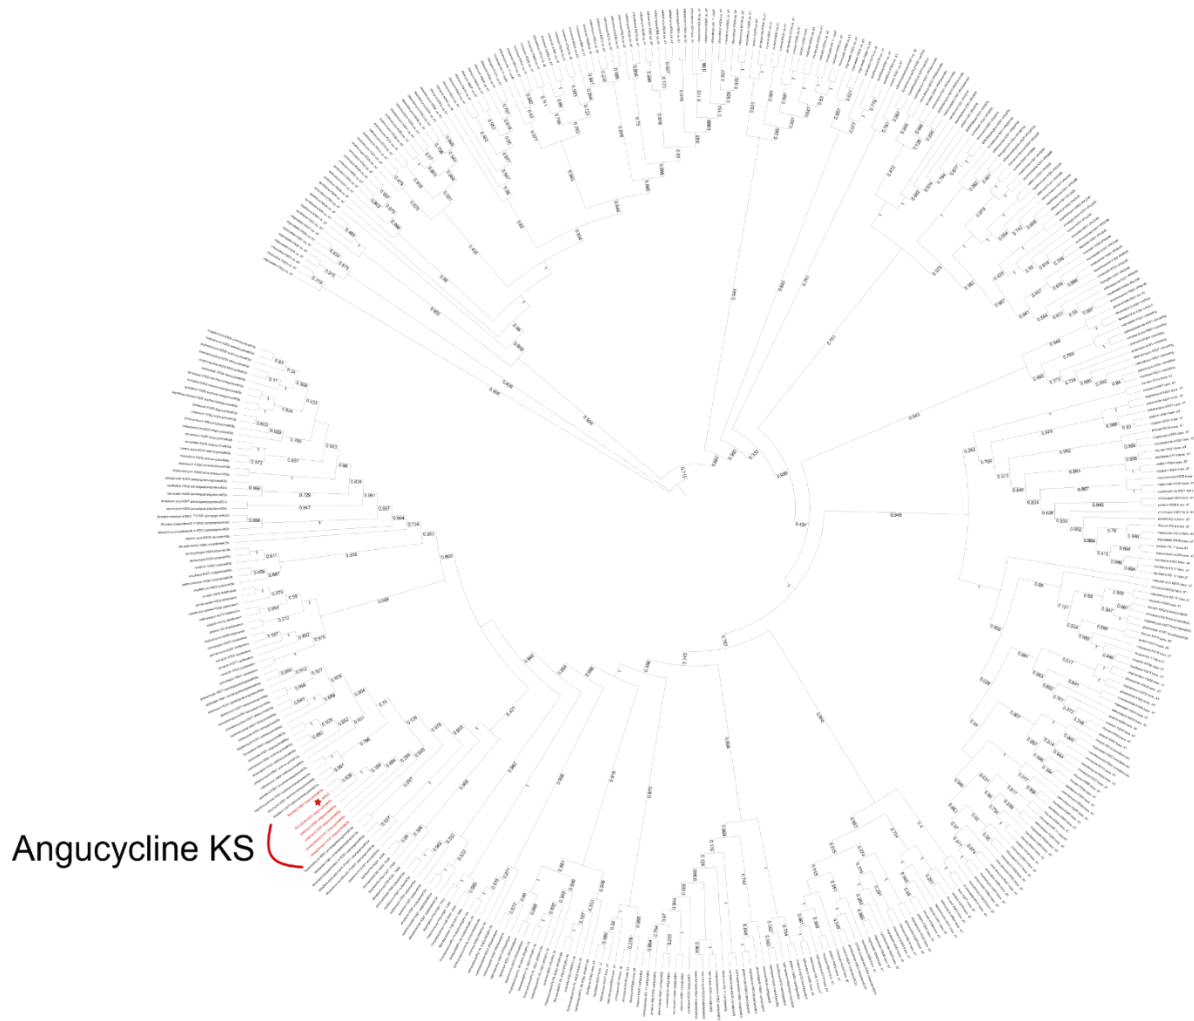

**Figure S1.** Phylogenetic tree of the putative ketosynthase of the *mdk* cluster MdkA created with NaPDoS2. The red branch of the tree is the branch where MdkA was placed, all neighboring ketosynthases are associated with angucycline gene clusters. MdkA is marked with a red star.

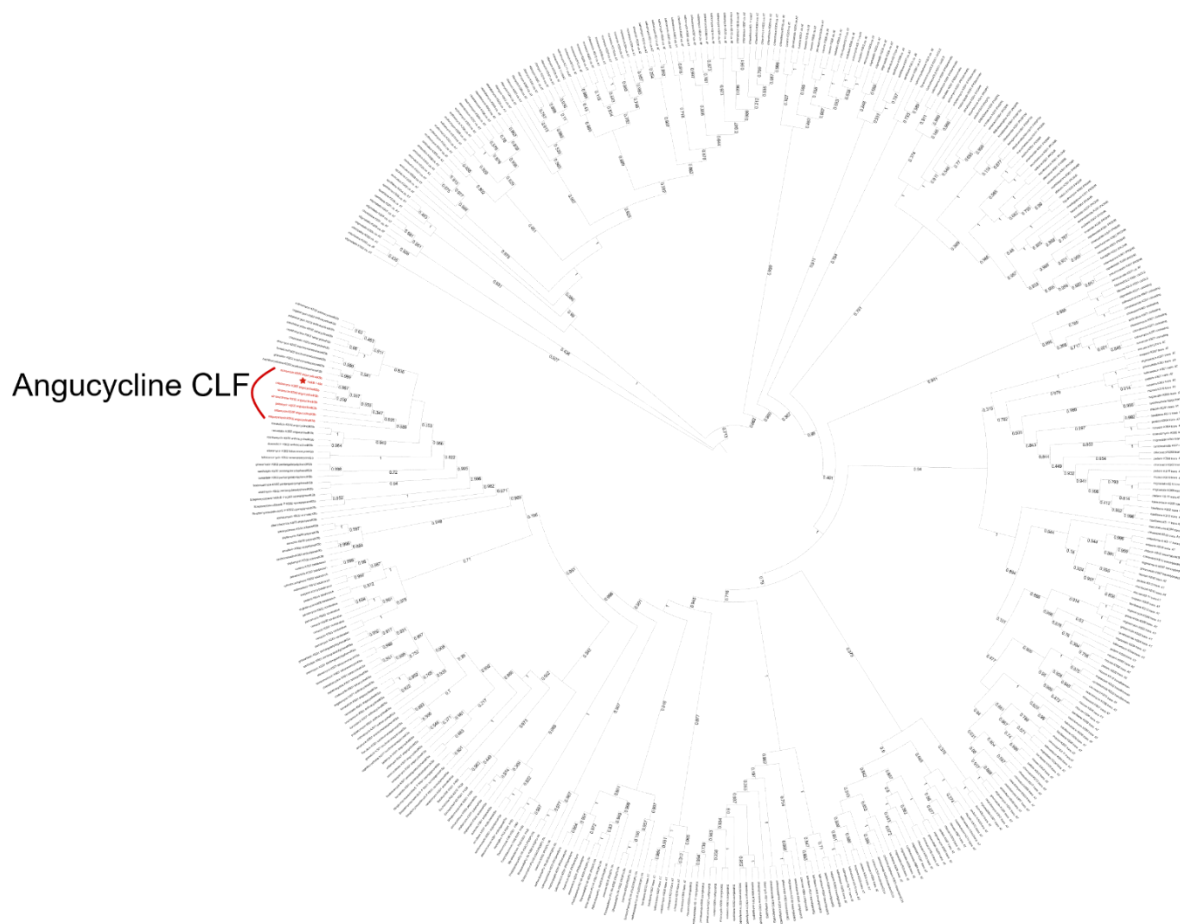

**Figure S2.** Phylogenetic tree of the putative chain length factor (CLF) of the *mdk* cluster MdkB created with NaPDoS2. The red branch of the tree is the branch where MdkB was placed, all neighboring CLF's are associated with angucycline gene clusters. MdkB is marked with a red star.

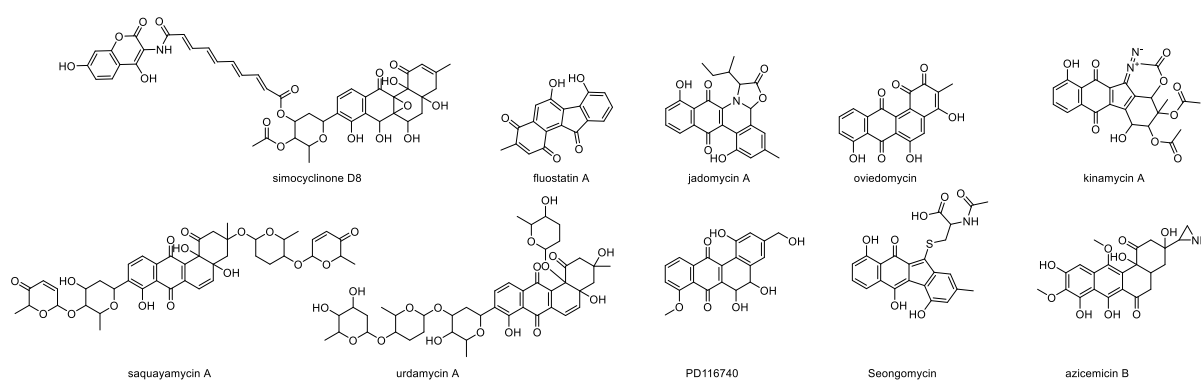

**Figure S3.** Structures of angucycline products correlating to depicted genes within the phylogenetic tree.

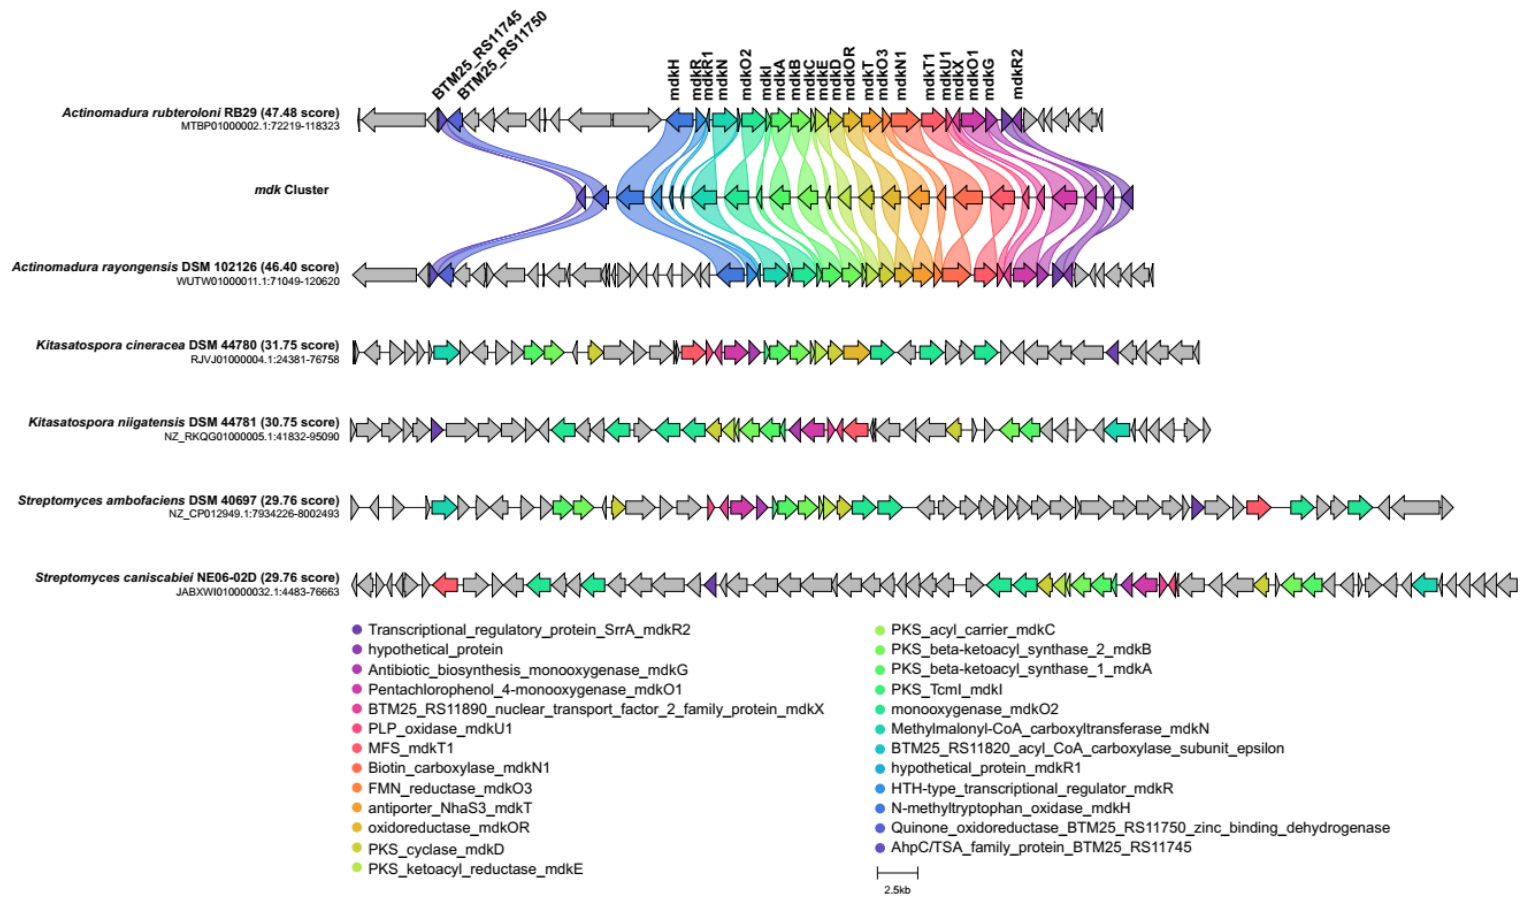

**Figure S4.** Cblaster analysis using the *mdk* gene cluster sequence as query sequence. Five gene clusters with similar gene arrangement and identity (threshold of 30% identity) are depicted and homologous gene sequences are shown in the same color code. Annotation of genes with the respective colour code are shown at the bottom

**Table S4.** PCR primers used in this study

| <b>Name and Purpose</b>                                                                          | <b>Sequence (5'-3')</b>                                             |
|--------------------------------------------------------------------------------------------------|---------------------------------------------------------------------|
| $\Delta$ acrR left<br>(oligo for generating the resistance cassette for mutation of regulators)  | GCACCGTGTAGACTCCCAGACGGAAGG<br>AGATTCCGGATGATTCCGGGGATCCGT<br>CGACC |
| $\Delta$ acrR right<br>(oligo for generating the resistance cassette for mutation of regulators) | CCGCAGCGGTTTCAGTTTCTCTCAACAGG<br>AAGTTCACATGTGTAGGCTGGAGCTGC<br>TTC |
| test_primer_delta_forward<br>(verification of mutation of regulator )                            | AGATCTGCGGACACTTCCAC                                                |
| test_primer_delta_reverse<br>(verification of mutation of regulator )                            | GCACGAGTGACTCCTGTAGG                                                |
| Out_cluster_Right_forward (OCR)<br>(verification presence of plasmid backbone)                   | GTCCCTCTGTTTTTCGCACG                                                |
| Out_cluster_Right_reverse (OCR)<br>(verification presence of plasmid backbone)                   | GTATCGGCCGAGTGGTTTCA                                                |
| Out_cluster_Left_Forward (OCL)<br>(verification presence of plasmid backbone)                    | CTCAACGCTATCAGGCGGA                                                 |
| Out_cluster_Left_reverse (OCL)<br>(verification presence of plasmid backbone)                    | CGCATCGGTGGCTCCTTTTT                                                |
| OutRight_LONG_Forward primer (ORL)<br>(verification presence of plasmid backbone)                | GATGTTCTACCCCGACGTGC                                                |
| OutRight_LONG_Reverse primer (ORL)<br>(verification presence of plasmid backbone)                | TGGAGATCCAGCCCGGATAG                                                |
| recA_S_coelicolor_forward<br>(positive control for genomic DNA in <i>S. coelicolor</i> )         | CACTGAAGTTCTACGCCTCG                                                |
| recA_S_coelicolor_reverse<br>(positive control for genomic DNA in <i>S. coelicolor</i> )         | TTGTCCTTCAGGAAGTTGCG                                                |

**Table S5.** PCR conditions used for verification of gene cluster

| <b>Step</b>      | <b>Temperature [°C]</b> | <b>Duration</b> |
|------------------|-------------------------|-----------------|
| Heat Lid         | 110                     |                 |
| Initial Melting  | 98                      | 30 s            |
| Start Cycle      |                         | 35 x            |
| Melting          | 98                      | 15 s            |
| Annealing        | 64                      | 30 s            |
| Elongation       | 72                      | 30 s            |
| End Cycle        |                         |                 |
| Final Elongation | 72                      | 5 min.          |
| Store            | 4                       | $\infty$        |

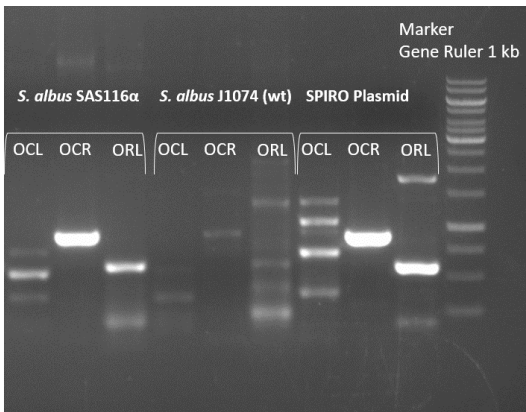

**Figure S5** Gel chromatogram to verify the presence of the SPIRO plasmid in *S. albus* J1074.

Left: Samples of *S. albus* carrying the SPIRO plasmid, middle: *S. albus* wildtype (negative control); right: SPIRO plasmid (positive control).

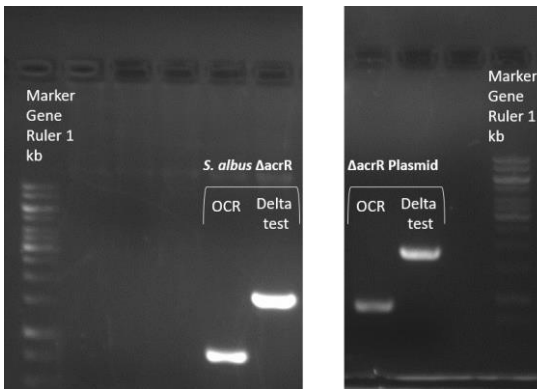

**Figure S6.** Gel chromatogram to verify the presence of the mutated plasmid ( $\Delta$ acrR) in *S. albus* J1074.

Left: Samples of genomic DNA from strain carrying the mutated plasmid; Right: Samples of DNA of isolated  $\Delta$ acrR plasmid.

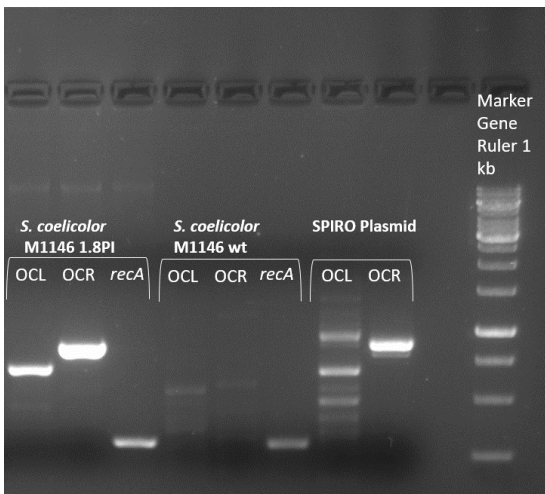

**Figure S7.** Gel chromatogram to verify the presence of the SPIRO plasmid in *S. coelicolor* M1146.

Left: samples from strain carrying plasmid; middle: samples of wildtype (negative control); right: plasmid DNA (positive control). The *recA* gene was used as a reference sequence to analyze for the presence of genomic DNA.

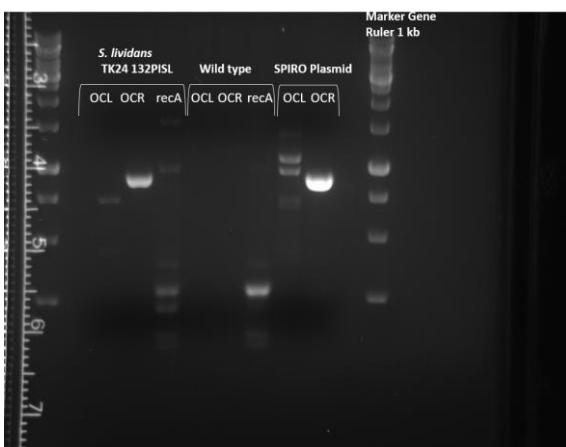

**Figure S8.** Verification of SPIRO plasmid in *S. lividans* TK24.

Left strain carrying plasmid, middle wild type (negative control), right plasmid DNA (positive control). The *recA* gene was used as a reference sequence to analyze for the presence of genomic DNA.

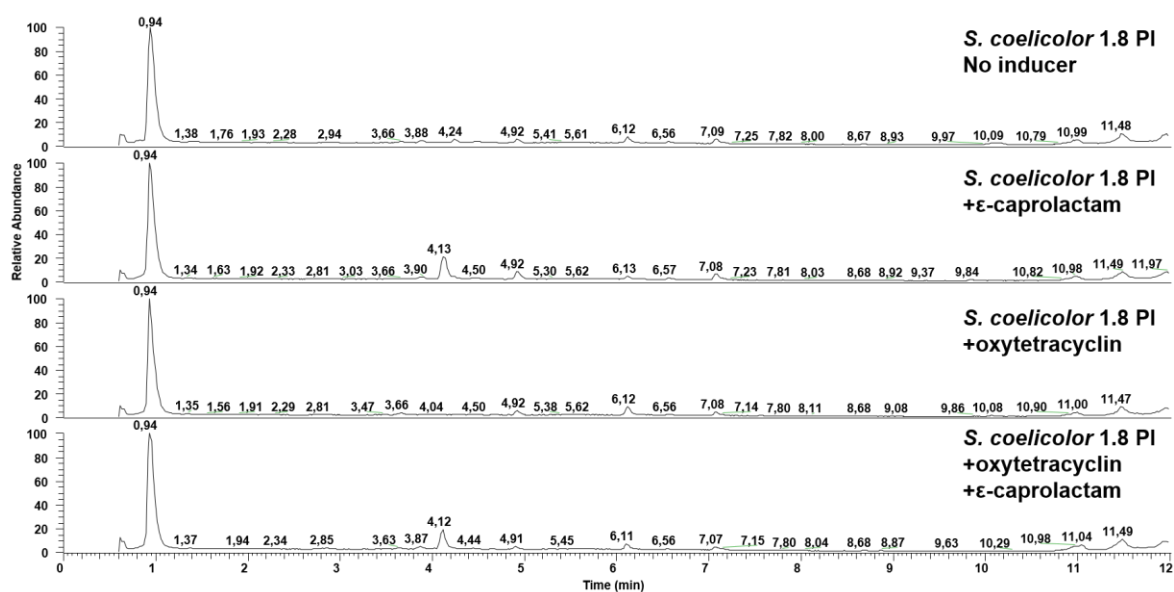

**Figure S9.** Total ion chromatogram of culture extracts of *S. coelicolor* strains carrying the *mdk* cluster obtained after treatment with different combinations of inducer (oxytetracycline and  $\epsilon$ -caprolactam).

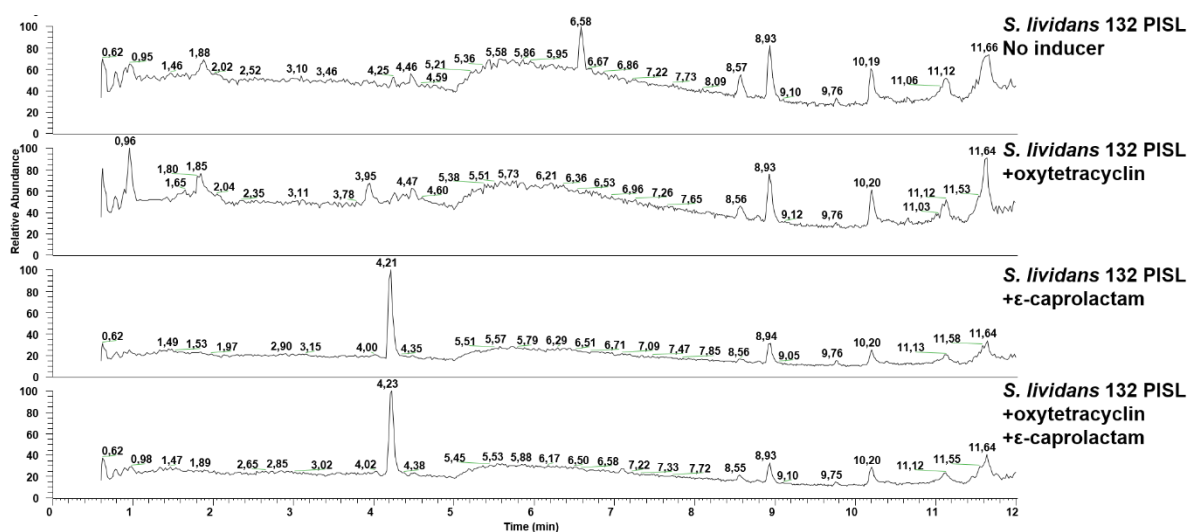

**Figure 10.** Total ion chromatogram of culture extracts of *S. lividans* strains carrying the *mdk* cluster obtained after treatment with different combinations of inducer (oxytetracycline and  $\epsilon$ -caprolactam).

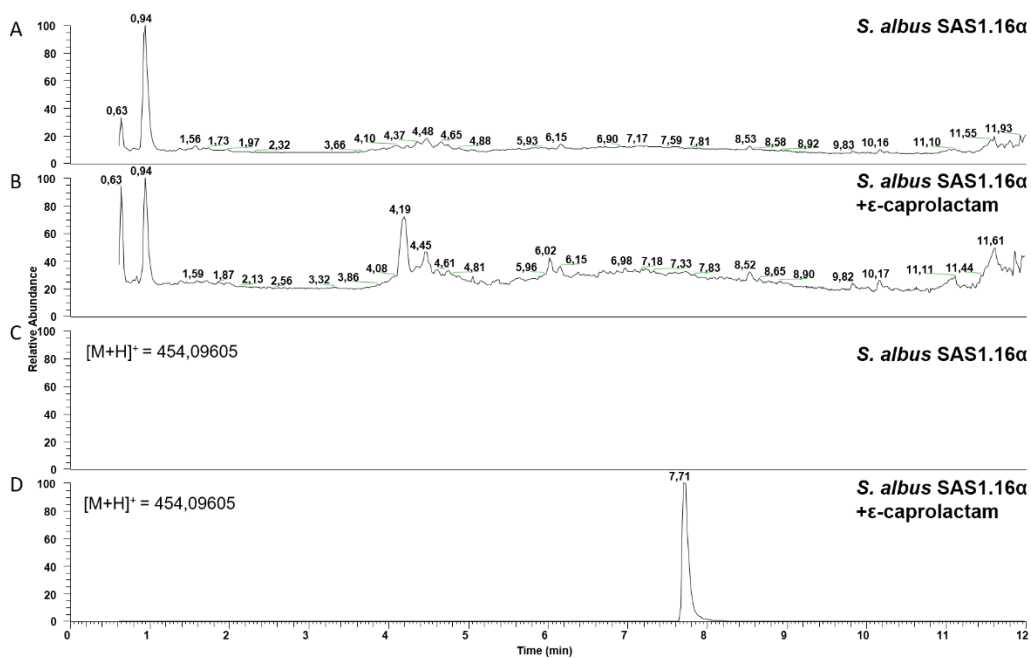

**Figure S11.** Total ion chromatograms (A,B) and extracted ion chromatograms (C,D) of culture extracts of *S. albus* carrying the *mdk* cluster obtained after treatment with different inducer combinations.

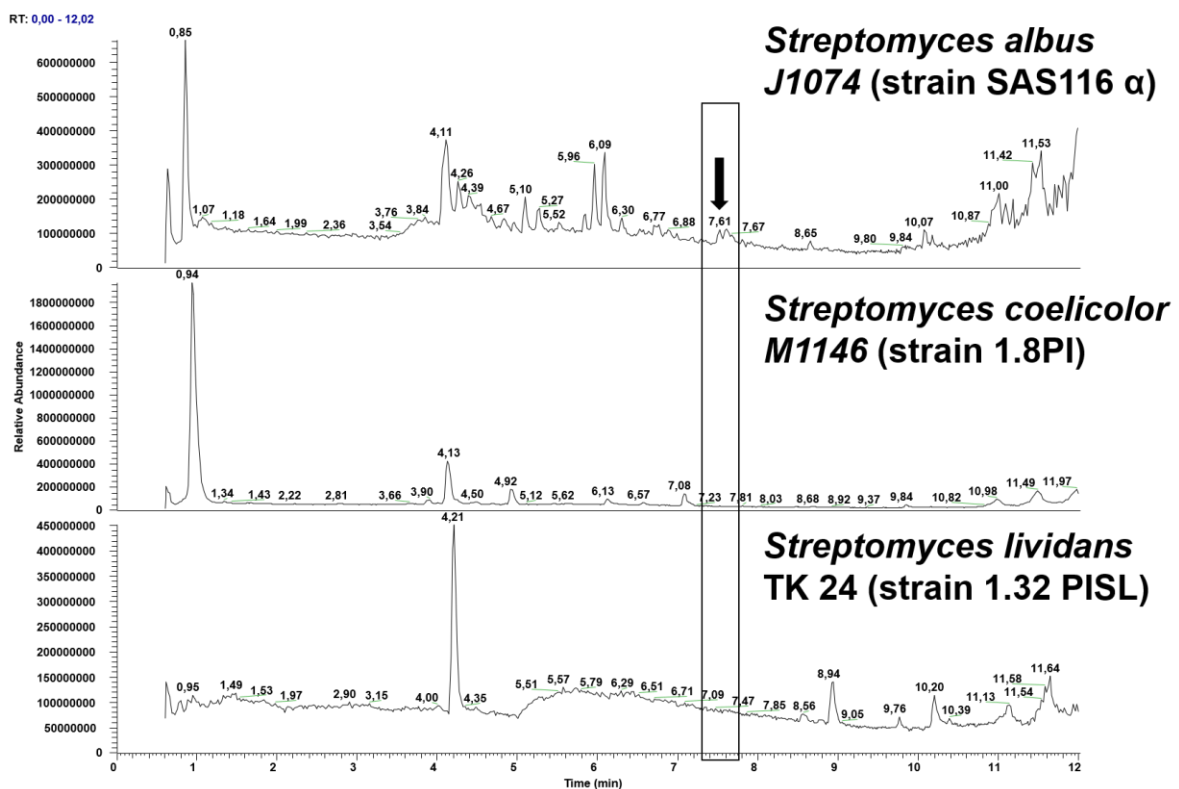

**Figure S12.** Total ion chromatograms of cultivation experiments with different expression strains carrying the *mdk* cluster in the presence of the inducer  $\epsilon$ -caprolactam. Retention time and peak with  $m/z = 454.0961$   $[M+H]^+$  is marked with an arrow.

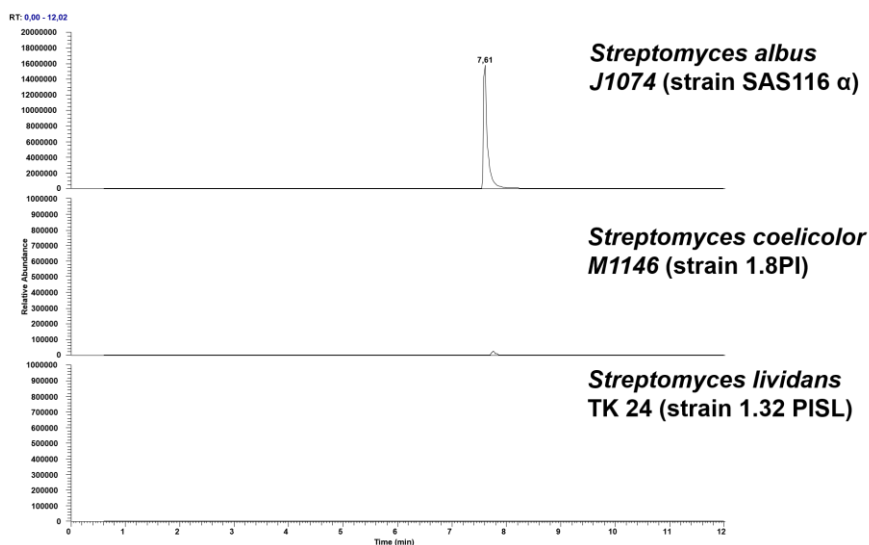

**Figure S13.** Extracted ion chromatogram ( $m/z=454.0961$  [ $M+H^+$ ]) using LC-MS/MS data from culture extracts of different expression strains. The respective expression host and the strain carrying the *mdk* BGC are named on the right side of the chromatograms.

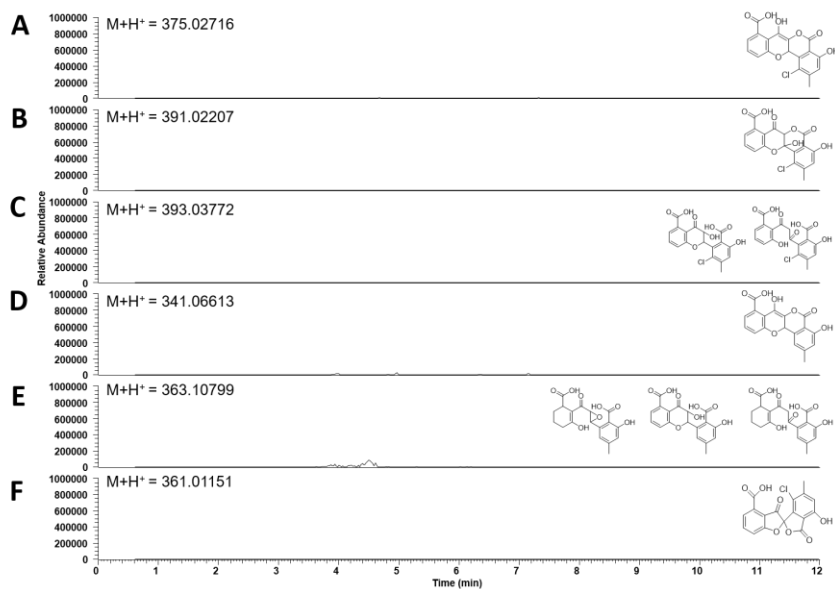

**Figure S14.** Extracted ion chromatogram using LC-MS/MS data from culture extracts of the expression strain *S. albus* SAS116 $\alpha$ . Searched  $m/z$  values that could correspond to maduralactomycin-like core structures (A-F) are depicted on the left side of the chromatogram.



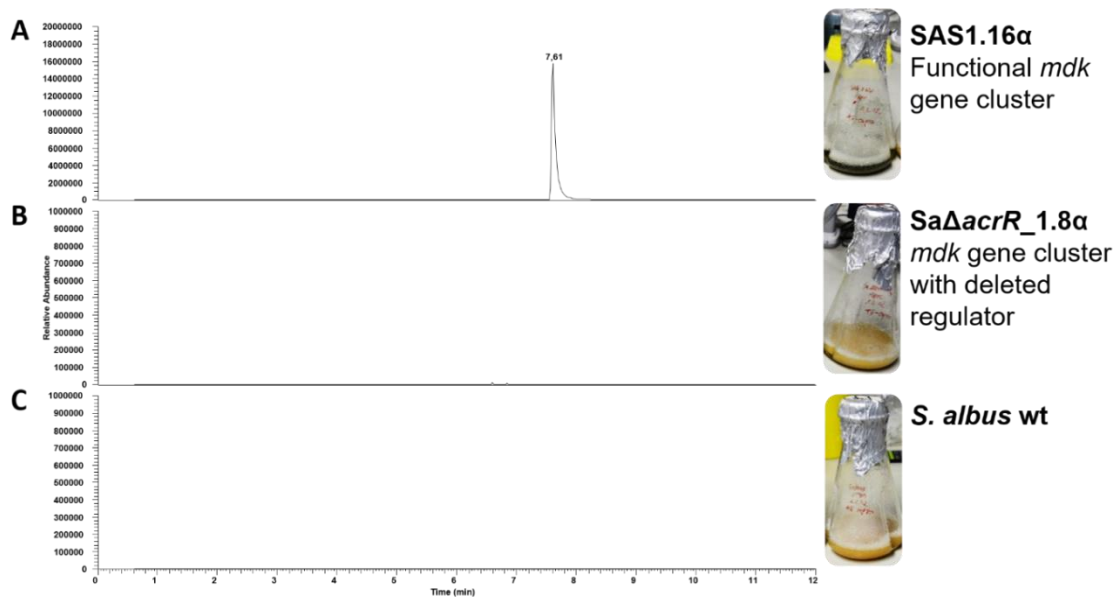

**Figure S15.** Extracted ion chromatogram ( $m/z = 454.0961$  [ $M+H^+$ ]) using LC-MS/MS data retrieved from culture extracts of the expression strain *S. albus* SAS116α carrying the functional *mdk* cluster, modified strain SaΔacrR\_1.8α and *S. albus* J1074 wildtype.

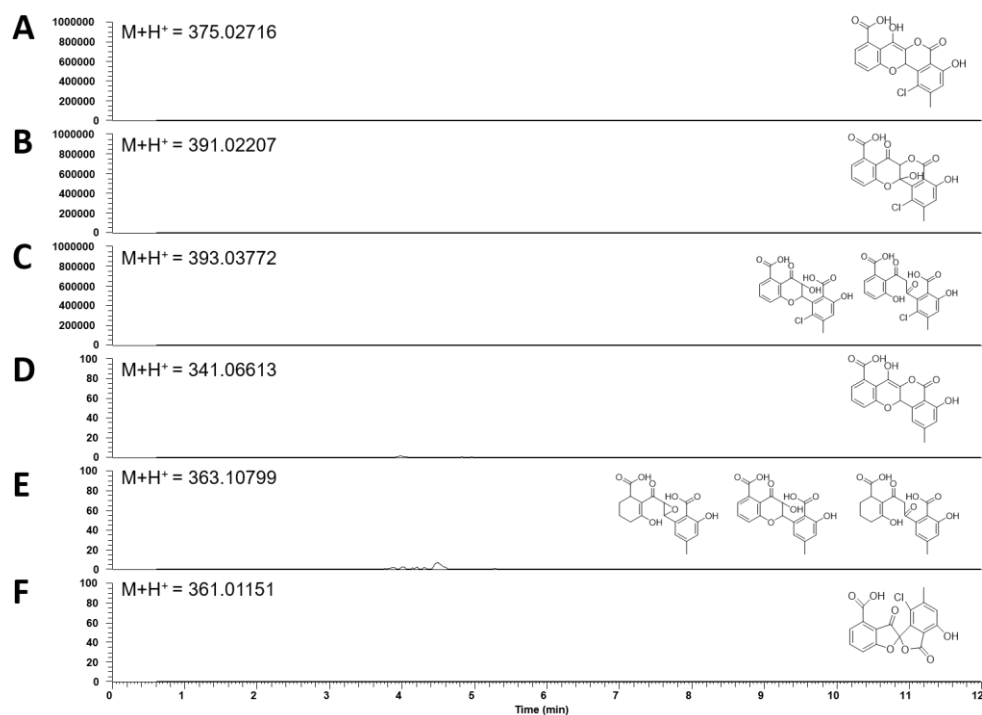

**Figure S16.** Extracted ion chromatograms of  $m/z$  values corresponding to putative maduralactomycin derivatives (A-F) that could be produced by the modified strain SaΔacrR. The respective  $m/z$  [ $M+H^+$ ] values as well as the respective structures are found in each line (A-F).

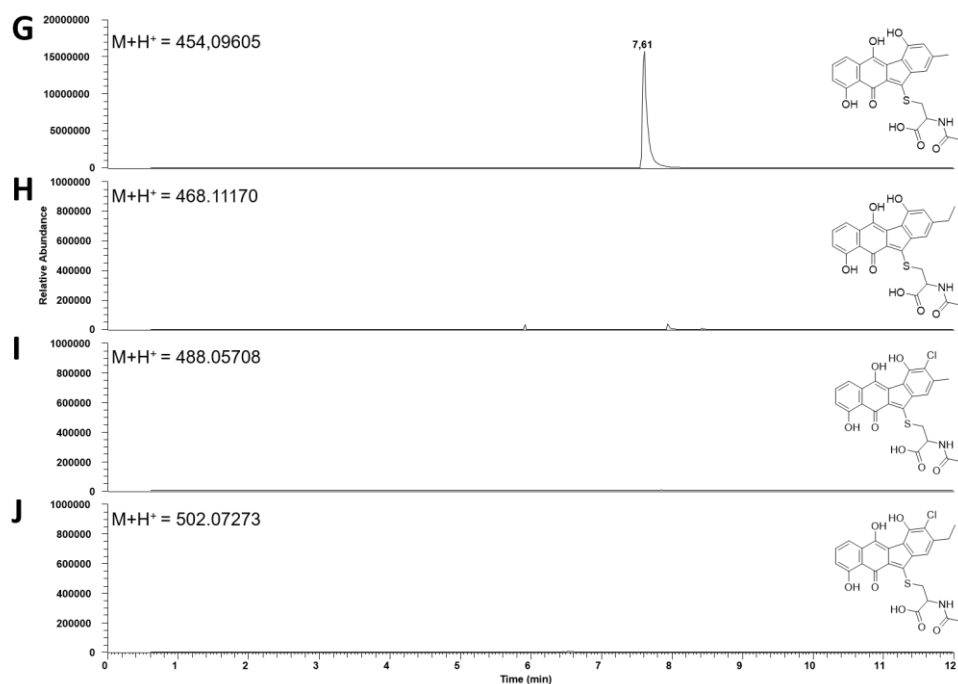

**Figure S17.** Extracted ion chromatogram of  $m/z$  values corresponding to putative seongomycin derivatives (G-J) that could be produced by strain SAS116 $\alpha$ . The respective  $m/z$  [ $M+H^+$ ] values as well as the respective structures are found in each line (G-J)

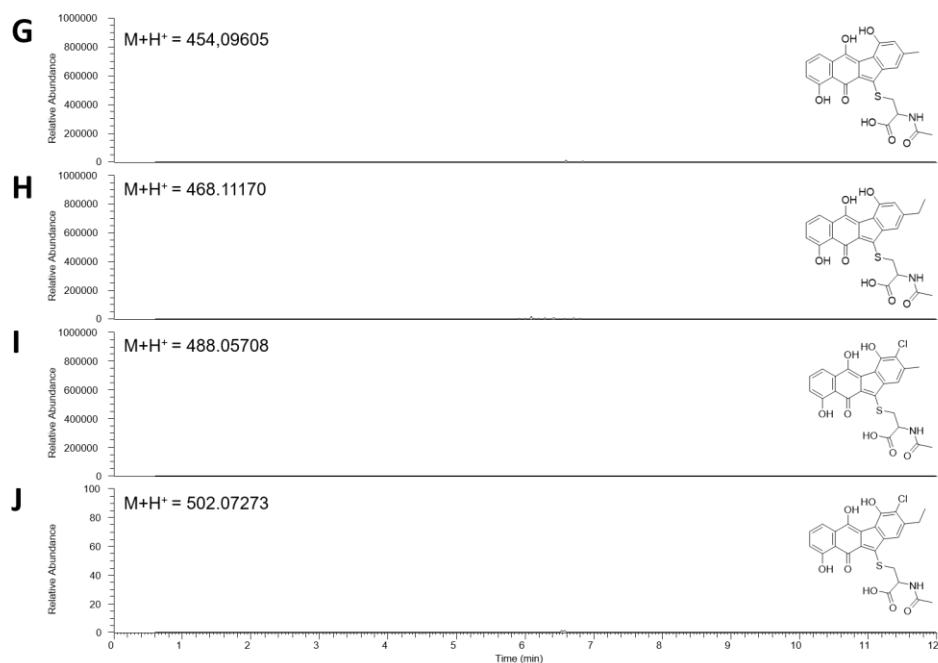

**Figure S18.** Extracted ion chromatogram of  $m/z$  values corresponding to putative seongomycin derivatives that could be produced by strain Sa $\Delta$ acrR. The respective  $m/z$  [ $M+H^+$ ] values as well as the respective structures are found in each line (G-J)

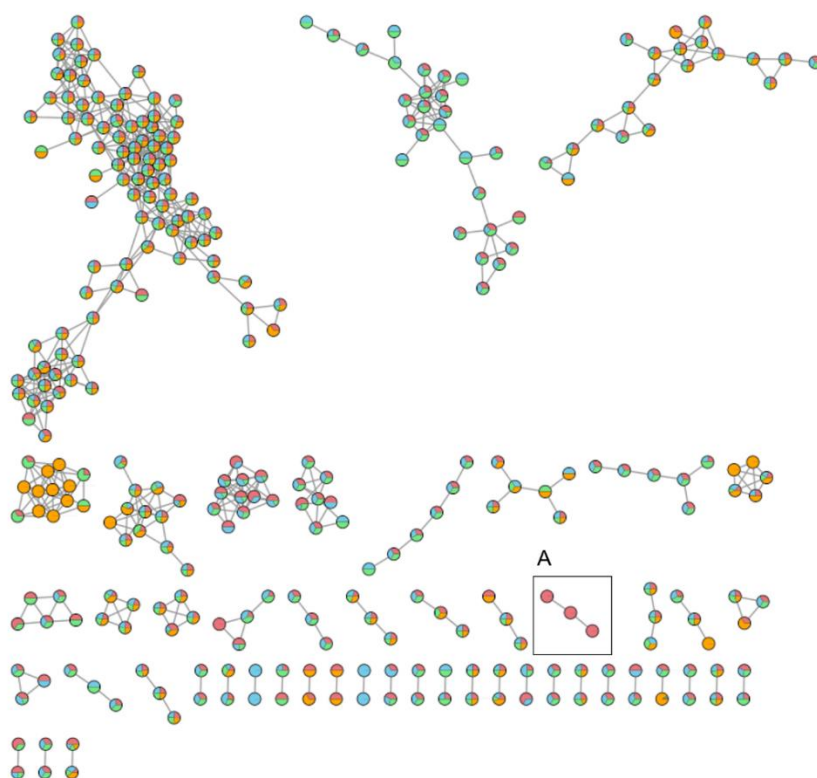

**Figure S19.** Exemplary GNPS-based network analysis of 10% MeOH SPE Fraction without self-loops. Red SAS116, Blue  $\Delta$ SAS116, Green SAS WT, Orange blank. Cluster A marks the seongomycin cluster.

**Table S6.** Summary of GNPS nodes exclusively occurring in strain *S. albus* J1074/SAS116  $\alpha$ 

| <i>m/z</i>                                 | Int [10 <sup>6</sup> ] | RT [min]   | SumForm[M+H <sup>+</sup> ]                                     | Comments                                                                              |
|--------------------------------------------|------------------------|------------|----------------------------------------------------------------|---------------------------------------------------------------------------------------|
| <b>Cluster A (10% MeOH SPE Fraction)</b>   |                        |            |                                                                |                                                                                       |
| 454.094                                    | 22.6                   | 7.74       | C23H20O7NS                                                     | Seongomycin + ionization cluster? Also traces in $\Delta$ SAS (10 <sup>4</sup> )      |
| 468.074                                    | 1.11                   | 7.74       | C23H18O8NS                                                     | 13.98 to 454.094 (+O -H <sub>2</sub> )                                                |
| 452.079                                    | 2.77                   | 7.74       | C23H18O7NS                                                     | 15.995 (Oxygen) to 468.074                                                            |
| <b>Self-Loops (10% MeOH SPE Fraction)</b>  |                        |            |                                                                |                                                                                       |
| 190.086                                    | 0.79                   | 4.08-4.2   | C11H12O2N                                                      | Broad and background                                                                  |
| 472.171                                    | 0.99                   | 5.68       | C23H26O8N3                                                     |                                                                                       |
| 245.099                                    |                        | 1-12       |                                                                | Background, also in 100%                                                              |
| 426.165                                    | 1.37                   | 5.57; 6.0  | C22H24O6N3?                                                    | 2 peaks, MS +2 and -2 Pattern caused by overlap with other compound? (Pseudohalogen?) |
| 453.165                                    | 0.76                   | 4.73; 4.87 | C24H25O7N2                                                     | 2 Peaks                                                                               |
| 369.096                                    | 1.38                   | 6.26       | C20H17O7                                                       |                                                                                       |
| 482.144                                    | 1.71                   | 5.20       | C25H24O9N                                                      | Not clear sum formula                                                                 |
| 201.073                                    |                        | 1-12       |                                                                | Background                                                                            |
| 261.130                                    |                        | 1-12       |                                                                | Background, also in 100%                                                              |
| <b>Self-Loops (100% MeOH SPE Fraction)</b> |                        |            |                                                                |                                                                                       |
| 460.139                                    | 1.73                   | 7.05       | C27H26O2NS2                                                    | high M+2 $\rightarrow$ indicates Sulfur                                               |
| 245.099                                    |                        | 1-12       |                                                                | Background                                                                            |
| 189.052                                    |                        | 1-12       |                                                                | Background                                                                            |
| 454.095                                    | 11.0                   | 7.74       | C23H20O7NS                                                     | Seongomycin                                                                           |
| 215.089                                    |                        | 1-12       |                                                                | Background                                                                            |
| 261.131                                    |                        | 1-12       |                                                                | Background, Also in 10%                                                               |
| 1109.580                                   | 1.55                   | 7.38       | C <sub>60</sub> H <sub>84</sub> N <sub>2</sub> O <sub>18</sub> | Overlap of Candicidin derivatives                                                     |
| 289.125                                    |                        | 1-12       |                                                                | Background                                                                            |
| 517.370                                    | 5.43                   | 10.93      | C24H49O6N6                                                     |                                                                                       |
| 493.139                                    | 0.47                   | 6.76; 7.05 | C29H21O6N2                                                     | 2 Peaks                                                                               |
| 442.259                                    | 0.50                   | 6.94; 7.77 | C19H43O2N3S3                                                   | 2 Peaks                                                                               |
| 245.099                                    |                        | 1-12       |                                                                | Background, also in 10%                                                               |

**Table S7.** Summary of GNPS nodes exclusively occurring in *S. albus* SaΔacrR

| <i>m/z</i>                                 | Int [10 <sup>6</sup> ] | RT [min]   | SumForm[M+H <sup>+</sup> ] | Comments                                          |
|--------------------------------------------|------------------------|------------|----------------------------|---------------------------------------------------|
| <b>Cluster B1</b> (10% MeOH SPE Fraction)  |                        |            |                            |                                                   |
| 680.227                                    | 7.48                   | 0.97; 1.52 | C26H34O13N9                | 2 Peaks                                           |
| 694.243                                    | 1.96                   | 0.97; 2.05 | C27H36O13N9                | 14.016 CH <sub>2</sub>                            |
| <b>Cluster B2</b> (10% Fraction)           |                        |            |                            |                                                   |
| 694.243                                    | 1.96                   | 0.97; 2.05 | C27H36O13N9                | Duplicate Cluster of B1 2 <sup>nd</sup> Peak?     |
| 680.227                                    | 7.48                   | 0.97; 1.52 | C26H34O13N9                | Duplicate Cluster of B1 2 <sup>nd</sup> Peak?     |
| Self-Loops (10% MeOH SPE Fraction)         |                        |            |                            |                                                   |
| 365.191                                    | 2.11                   | 0.93; 1.36 | C15H29O8N2                 |                                                   |
| 443.333                                    | 27.1                   | 11.47      | C21H43O4N6                 |                                                   |
| 473.344                                    | 8.44                   | 10.96      | C22H45O5N6                 |                                                   |
| 351.176                                    | 4.00                   | 0.82       | C14H27O8N2                 | Flowthrough                                       |
| <b>Cluster C1</b> (100% MeOH SPE Fraction) |                        |            |                            |                                                   |
| 694.243                                    | 1.70                   | 0.99; 2.04 | C27H36O13N9                | -14.014 to 680.229, see <b>B1-2</b>               |
| 664.233                                    | 2.39                   | 0.97; 1.61 | C26H34O12N9                | -CH <sub>2</sub> O to 694.243 ?                   |
| 680.229                                    | 6.05                   | 0.97; 1.52 | C26H34O13N9                | 15.996 (Oxygen) to 664.233; see <b>B1-2</b>       |
| 1393.620                                   | 0.019                  | 4.92       | ?                          | Low intensity                                     |
| <b>Cluster C2</b> (100% MeOH SPE Fraction) |                        |            |                            |                                                   |
| 694.243                                    | 1.70                   | 0.99; 2.04 | C27H36O13N9                | Duplicate from C1 missing 1393.62                 |
| 680.228                                    | 6.05                   | 0.97; 1.52 | C26H34O13N9                | Duplicate from C1 missing 1393.62                 |
| 664.233                                    | 2.39                   | 0.97; 1.61 | C26H34O12N9                | Duplicate from C1 missing 1393.62                 |
| <b>Cluster D</b> (100% MeOH SPE Fraction)  |                        |            |                            |                                                   |
| 335.181                                    | 0.84                   | 8.11       | C14H27O7N2                 | Flowthrough, ionization cluster                   |
| 351.176                                    | 23.7                   | 0.82       | C14H27O8N2                 | 15.995 (Oxygen) to 335.181                        |
| 365.191                                    | 14.4                   | 0.93       | C15H29O8N2                 | 14.015 (CH <sub>2</sub> ) to 351.176              |
| <b>Cluster E</b> (100% Fraction))          |                        |            |                            |                                                   |
| 898.611                                    | 1.07                   | 7.62       | C47H80N9O8                 | Surugamide B,C,D                                  |
| 912.627                                    | 7.86                   | 7.82       | C48H82N9O8                 | 14.016 (CH <sub>2</sub> ) to 898.611 Surugamide A |
| Self-Loops (100% MeOH SPE Fraction)        |                        |            |                            |                                                   |
| 458.188                                    | 0.57                   | 3.06       | C18H28O9N5?                |                                                   |
| 473.086                                    | 0.73                   | 6.68; 8.08 | C19H21O14                  | 2 Peaks                                           |
| 566.203                                    | 0.36                   | 5.16; 5.33 | C31H28O6N5                 | 2 small peaks                                     |
| 299.642                                    | 0.51                   | 3.52; 3.84 | No hits                    | 2 peaks                                           |
| 480.775                                    | 1.10                   | 5.21; 5.31 | No hits                    | 2 peaks                                           |
| 259.120                                    | 0.59                   | 9.89       | ?                          |                                                   |
| 374.193                                    | 0.09                   | 6.60       | C12H24O5N9?                | traces                                            |
| 468.278                                    | 1.88                   | 8.40       | C29H34ON5?                 |                                                   |
| 215.089                                    |                        | 1-12       |                            | Background                                        |
| 261.131                                    |                        | 1-12       |                            | Background                                        |

**Table S8.** Summary of GNPS nodes shared by SAS 116  $\alpha$  and Sa $\Delta$ acrR

| <i>m/z</i>                                  | Int [10 <sup>6</sup> ] | RT [min]  | SumForm[M+H <sup>+</sup> ] | Comments                                      |
|---------------------------------------------|------------------------|-----------|----------------------------|-----------------------------------------------|
| <b>Cluster F</b> (100% MeOH SPE Fraction)   |                        |           |                            |                                               |
| 573.303                                     | 0.31                   | 8.23      | C27H45O11N2                |                                               |
| 914.435                                     | 0.39                   | 8.23      | ?                          |                                               |
| 900.420                                     | 0.55                   | 7.77      | ?                          | -14.015 CH <sub>2</sub> to 914.435            |
| 721.185                                     | 0.69                   | 7.80      | C31H29O13N8?               |                                               |
| 897.408                                     | 0.39                   | 8.23      | C41H57O13N10               | 14.015 to 883.393                             |
| 883.393                                     | 1.84                   | 7.77      | C40H55O13N10               | Occurs In wildtype                            |
| 869.377                                     | 0.53                   | 7.42      | C39H53O13N10               | 14.016 CH <sub>2</sub> to 883.393             |
| 911.424                                     | 0.5                    | 8.64      | C42H59O13N10               | 14.016 CH <sub>2</sub> to 897.408             |
| <b>Cluster G</b> (100% MeOH SPE Fraction)   |                        |           |                            |                                               |
| 611.297                                     | 3.04                   | 6.23      | ?                          |                                               |
| 373.219                                     | 7.13                   | 4.28      | C15H29O5N6                 |                                               |
| 485.272                                     | 5.20                   | 5.68      | C21H37O7N6                 |                                               |
| 486.303                                     | 63.1                   | 4.28      | C21H40O6N7                 |                                               |
| <b>Cluster H</b> (100% MeOH SPE Fraction)   |                        |           |                            |                                               |
| 632.254                                     | 0.98                   | 5.72      | C28H42O15N                 | Broad                                         |
| 374.108                                     | 1.61                   | 5.72      | C15H20O10N                 | Broad                                         |
| 356.097                                     | 1.95                   | 5.72      | C15H18O9N                  |                                               |
| 416.118                                     | 4.48                   | 6.10      | C17H22O11N                 | Occurs also in Wildtype                       |
| <b>Cluster I</b> (100% MeOH SPE Fraction)   |                        |           |                            |                                               |
| 548.319                                     | 0.13                   | 5.46      | C25H46O10N3                | Alternative C26H42O6N7                        |
| 649.367                                     | 0.14                   | 5.31      | C29H53O12N4?               |                                               |
| 706.387                                     | 0.22                   | 4.5; 5.19 | C31H56O13N5                | 2 Peaks, Traces                               |
| <b>Cluster J</b> (100% MeOH SPE Fraction)   |                        |           |                            |                                               |
| 508.285                                     | 1.93                   | 4.28      | ?                          |                                               |
| 993.579                                     | 0.47                   | 4.28      | ?                          | Traces                                        |
| <b>Cluster K</b> (100% F MeOH SPE Fraction) |                        |           |                            |                                               |
| 905.375                                     | 0.43                   | 7.77      | ?                          |                                               |
| 919.390                                     |                        | 8.23      | ?                          | 14.015 (CH <sub>2</sub> ) to 905.375          |
| <b>Cluster L</b> (100% MeOH SPE Fraction)   |                        |           |                            |                                               |
| 1009.540                                    | 0.016                  | 6.71      | ?                          | traces                                        |
| 1025.520                                    | ?                      | ?         | ?                          |                                               |
| <b>Cluster M</b> (100% MeOH SPE Fraction)   |                        |           |                            |                                               |
| 484.273                                     | 0.43                   | 8.41      | C29H34O2N5?                |                                               |
| 482.257                                     | 0.75                   | 8.32      | C29H32O2N5                 | -2.016 (H <sub>2</sub> , Double bond) 484.273 |

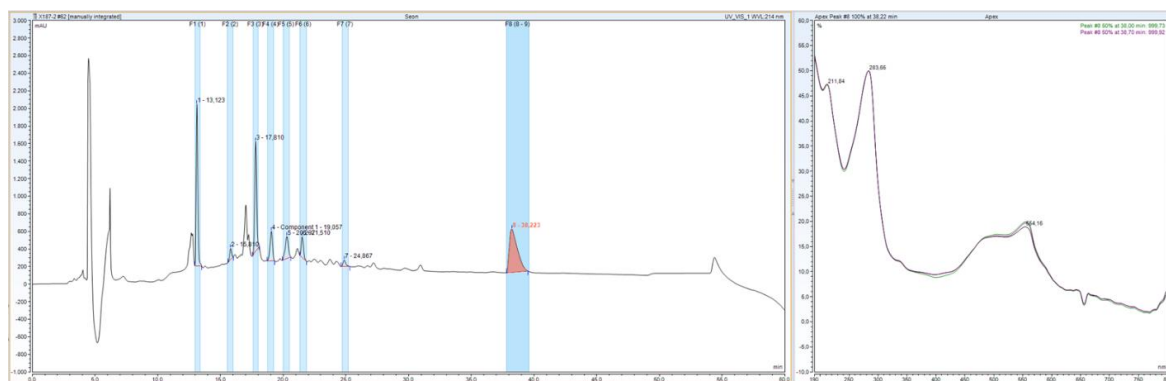

**Figure S20.** Preparative HPLC chromatogram of the extract containing seongomycin (left), UV absorption and HRMS spectrum of purified seongomycin (right).

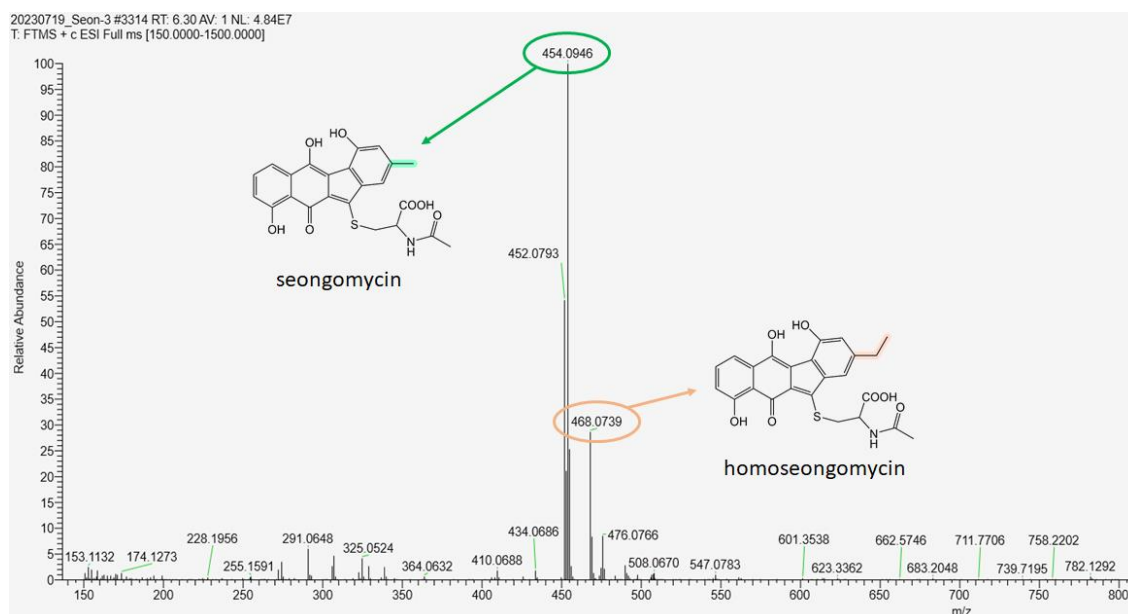

**Figure S21.** HR-MS/MS spectrum of enriched seongomycin fraction containing molecular ion features of seongomycin and homoseongomycin.

**Table S9.** NMR data for seongomycin in DMSO-*d*<sub>6</sub> + 1 drop TFA-*d* and chemical structure including numberings.

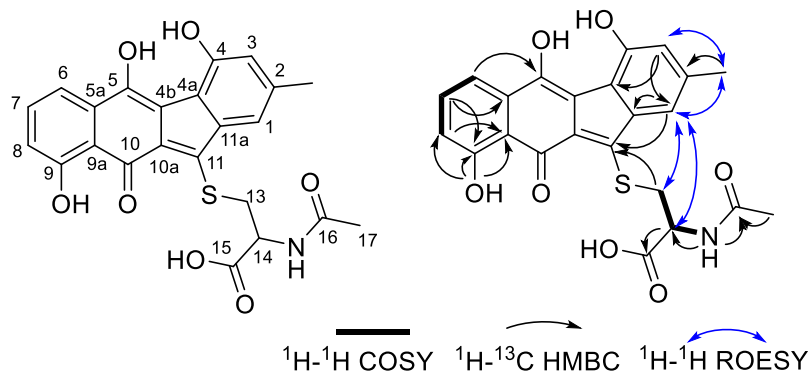

| Position | Experimental data   |                     |                                  |                                                                   | Literature reported values by Gould (Tetrahedron Letters, 38, 3139-3142) <sup>14</sup> |                     |
|----------|---------------------|---------------------|----------------------------------|-------------------------------------------------------------------|----------------------------------------------------------------------------------------|---------------------|
|          | $\delta_{\text{C}}$ | $\delta_{\text{H}}$ | mult. ( <i>J</i> in Hz)          | $^1\text{H}-^{13}\text{C}$ HMBC correlations (default parameters) | $\delta_{\text{C}}$                                                                    | $\delta_{\text{H}}$ |
| 1        | 117.8               | 7.18                | s                                | 11, 11a, 12                                                       | 117.4                                                                                  | 7.12                |
| 2        | 139.0               | -                   |                                  |                                                                   | 138.7                                                                                  | -                   |
| 3        | 117.3               | 6.76                | s                                | 1, 4a                                                             | 117.1                                                                                  | 6.70                |
| 4        | 149.4               | -                   |                                  |                                                                   | 149.2                                                                                  | -                   |
| 4a       | 120.6               | -                   |                                  |                                                                   | 120.5                                                                                  | -                   |
| 4b       | -                   | -                   |                                  |                                                                   | 114.1                                                                                  | -                   |
| 5        | 148.3               | -                   |                                  |                                                                   | 148.2                                                                                  | -                   |
| 5a       | 134.2               | -                   |                                  |                                                                   | 133.9                                                                                  | -                   |
| 6        | 116.4               | 7.36                | dd (7.9; 1.0)                    | 5, 7, 8                                                           | 116.1                                                                                  | 7.30                |
| 7        | 136.4               | 7.55                | t (8.0)                          | 5a, 9                                                             | 135.9                                                                                  | 7.50                |
| 8        | 119.9               | 6.98                | dd (8.0; 1.0)                    | 6, 9a                                                             | 119.7                                                                                  | 6.91                |
| 9        | 163.1               | -                   |                                  |                                                                   | 163.1                                                                                  | -                   |
| 9a       | 116.2               | -                   |                                  |                                                                   | 116.0                                                                                  | -                   |
| 9-OH     | -                   | -                   |                                  | 8, 9, 9a,                                                         | -                                                                                      | 13.6                |
| 10       | -                   | -                   |                                  |                                                                   | 184.0                                                                                  | -                   |
| 10a      | -                   | -                   |                                  |                                                                   | 128.4                                                                                  | -                   |
| 11       | 146.7               | -                   |                                  | 1, 13                                                             | 146.1                                                                                  | -                   |
| 11a      | 142.1               | -                   |                                  |                                                                   | 141.8                                                                                  | -                   |
| 12       | 20.9                | 2.30                | s                                | 1, 3                                                              |                                                                                        |                     |
| 13       | 34.9                | 3.89<br>3.55        | dd (13.5; 4.7)<br>dd (13.5; 9.0) | 11                                                                | 34.8                                                                                   | 3.86<br>3.53        |
| 14       | 52.6                | 4.43                | dd (8.8; 4.7)                    | 13, 15                                                            | 52.6                                                                                   | 4.43                |
| 15       | 172.0               | -                   |                                  |                                                                   | 171.9                                                                                  | -                   |
| 16       | 169.9               | -                   |                                  |                                                                   | 169.7                                                                                  | -                   |
| 17       | 22.5                | 1.73                | s                                | 16                                                                | 22.3                                                                                   | 1.73                |
| NH       | -                   | 8.12                | s                                | 14, 16                                                            | -                                                                                      | 8.23                |



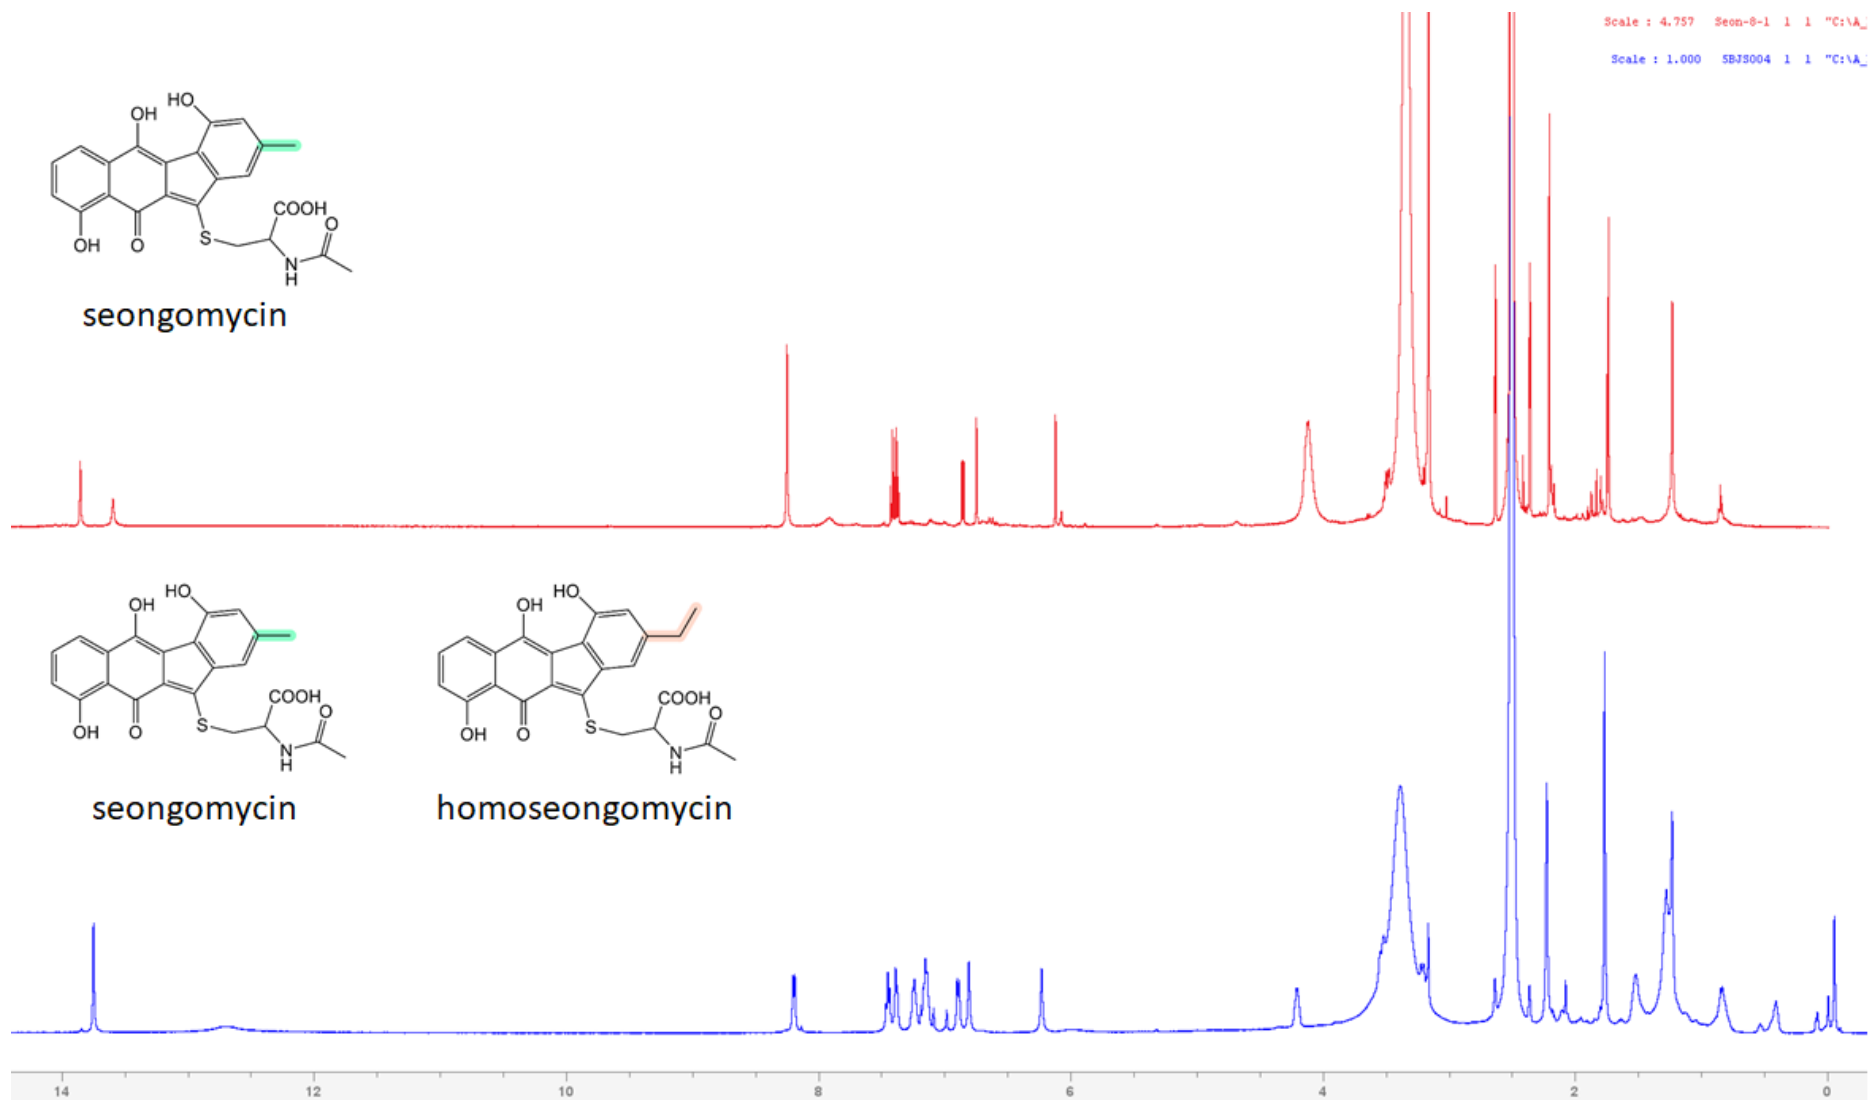

**Figure S22.** Overlaid <sup>1</sup>H NMR spectra of seongomycin (upper spectrum) and a mixture of seongomycin and homoseongomycin in DMSO-*d*<sub>6</sub> (lower spectrum).

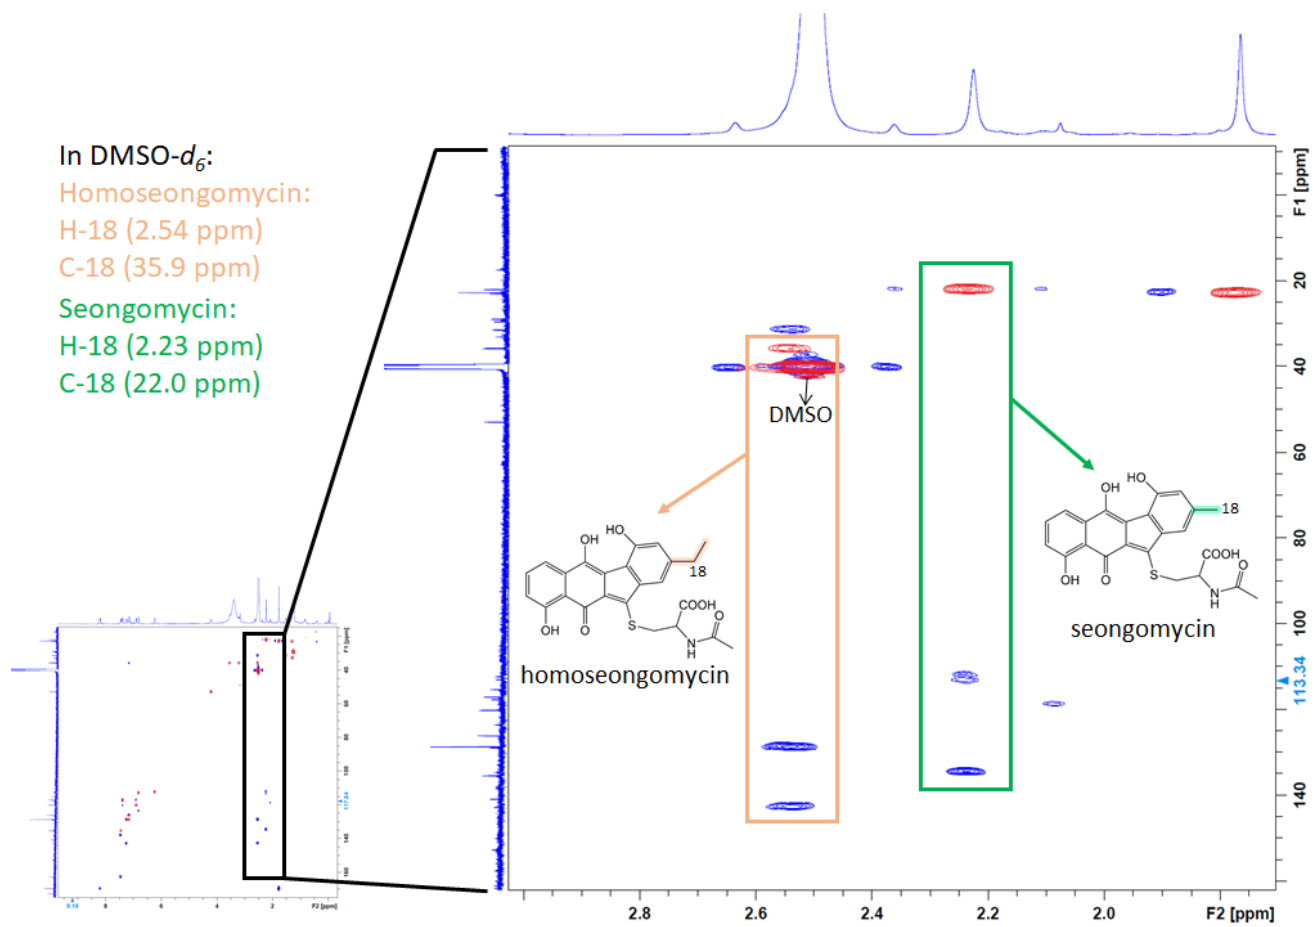

**Figure S23.**  $^1\text{H}$ - $^{13}\text{C}$  HSQC spectrum of an enriched sample containing seongomycin and homoseongomycin in DMSO- $d_6$ .

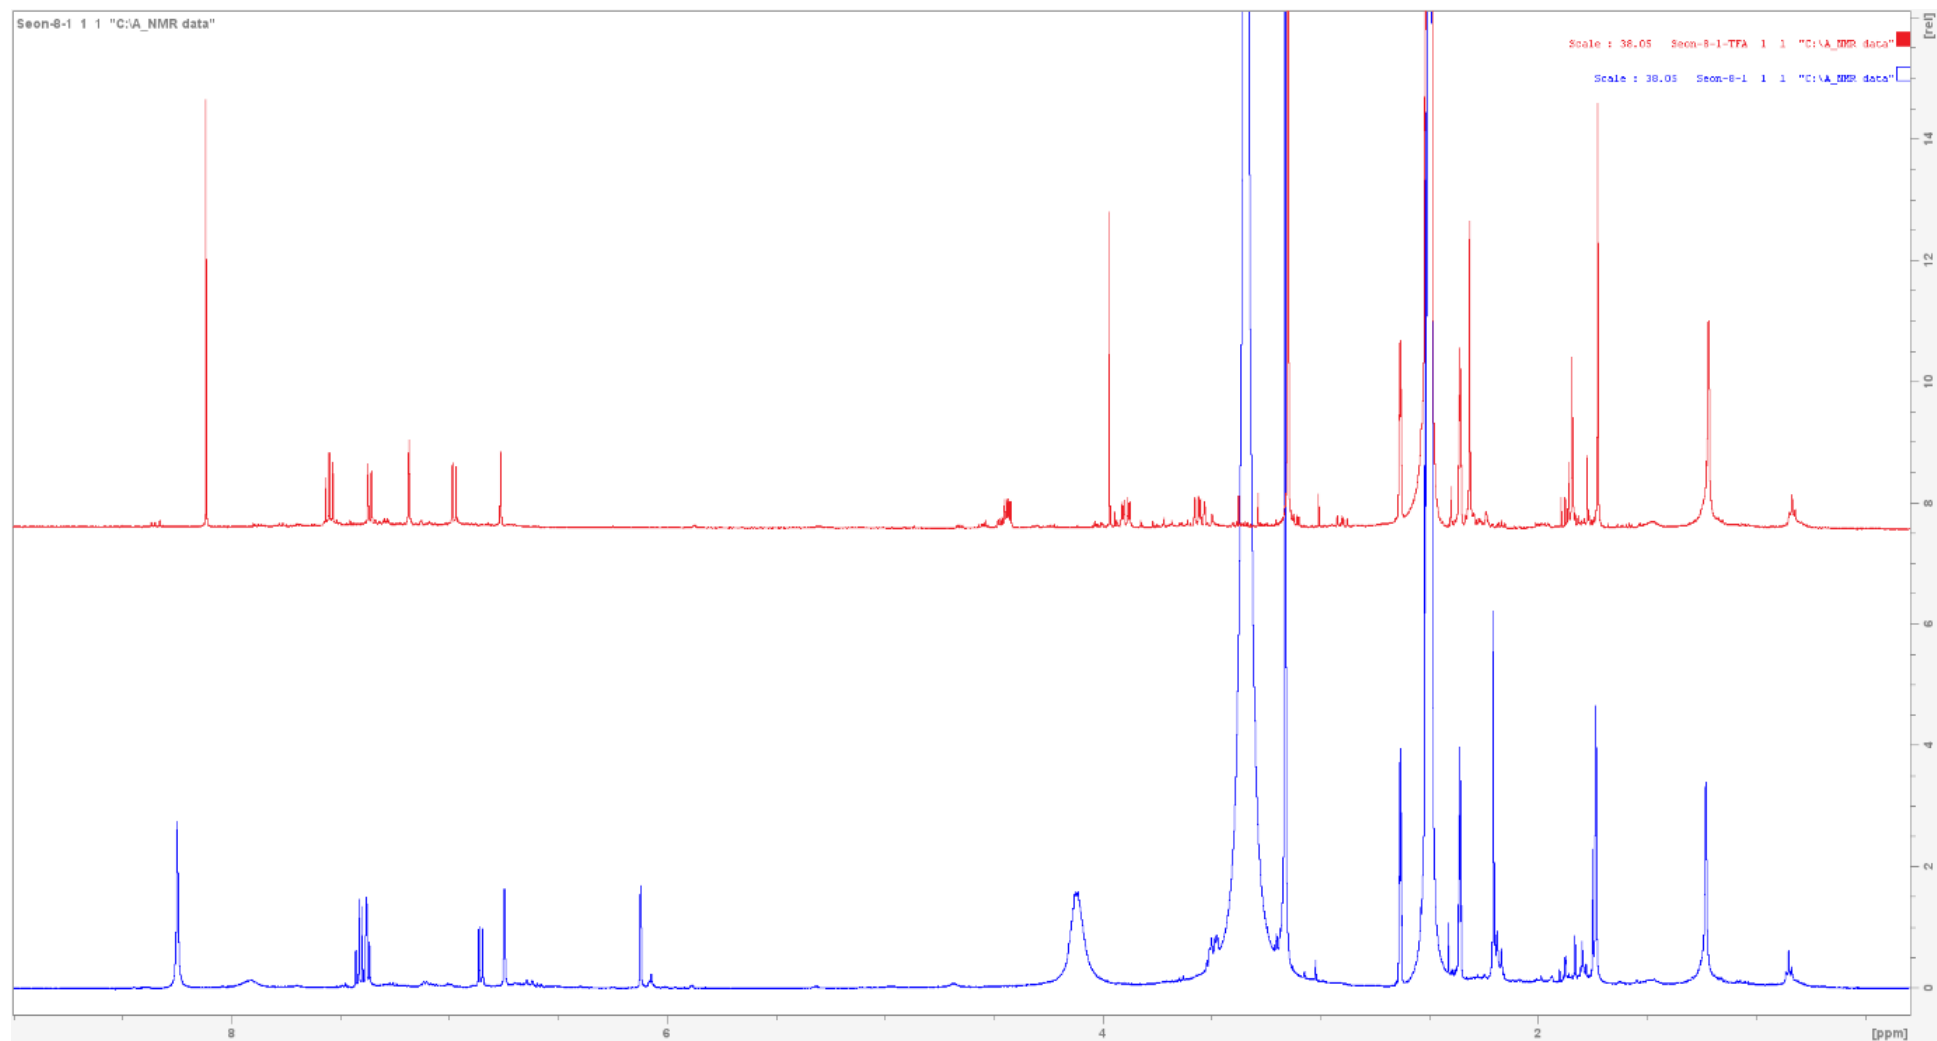

**Figure S24.** Overlaid <sup>1</sup>H NMR spectra of seongomycin in DMSO-*d*<sub>6</sub> (lower) and DMSO-*d*<sub>6</sub> + 1 drop TFA-*d* (upper)

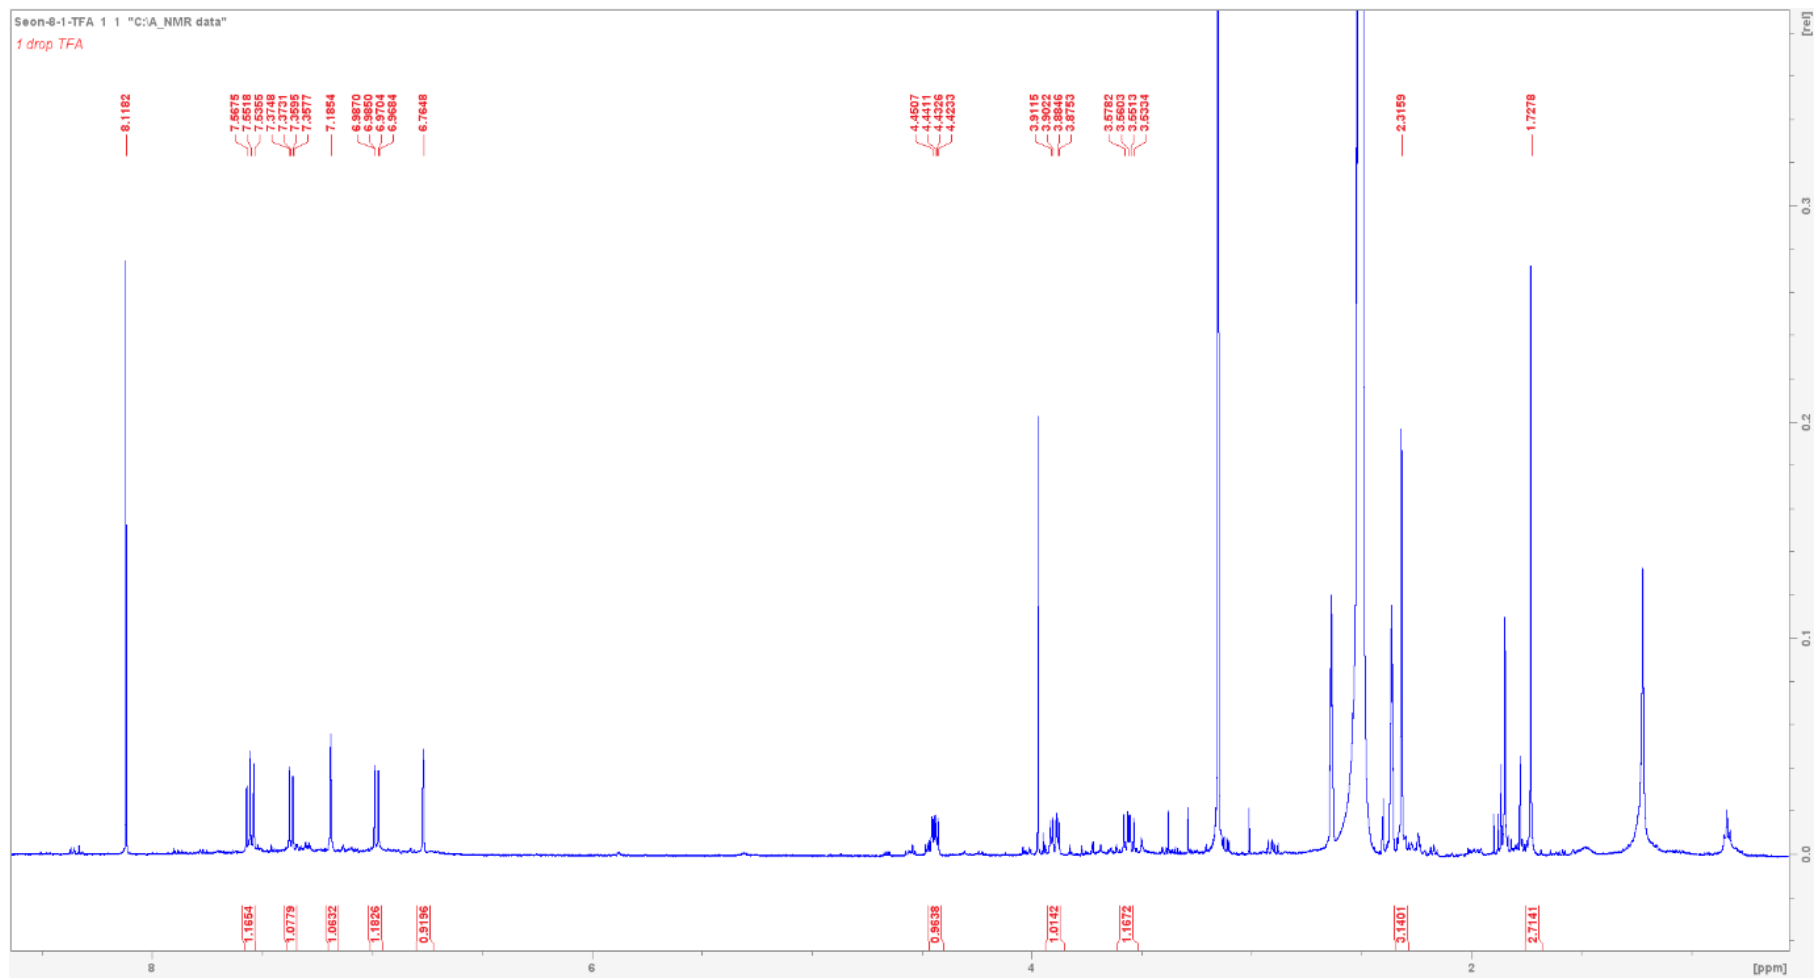

Figure S25.  $^1\text{H-NMR}$  spectrum of seongomycin in  $\text{DMSO-}d_6$  + 1 drop TFA-*d*.

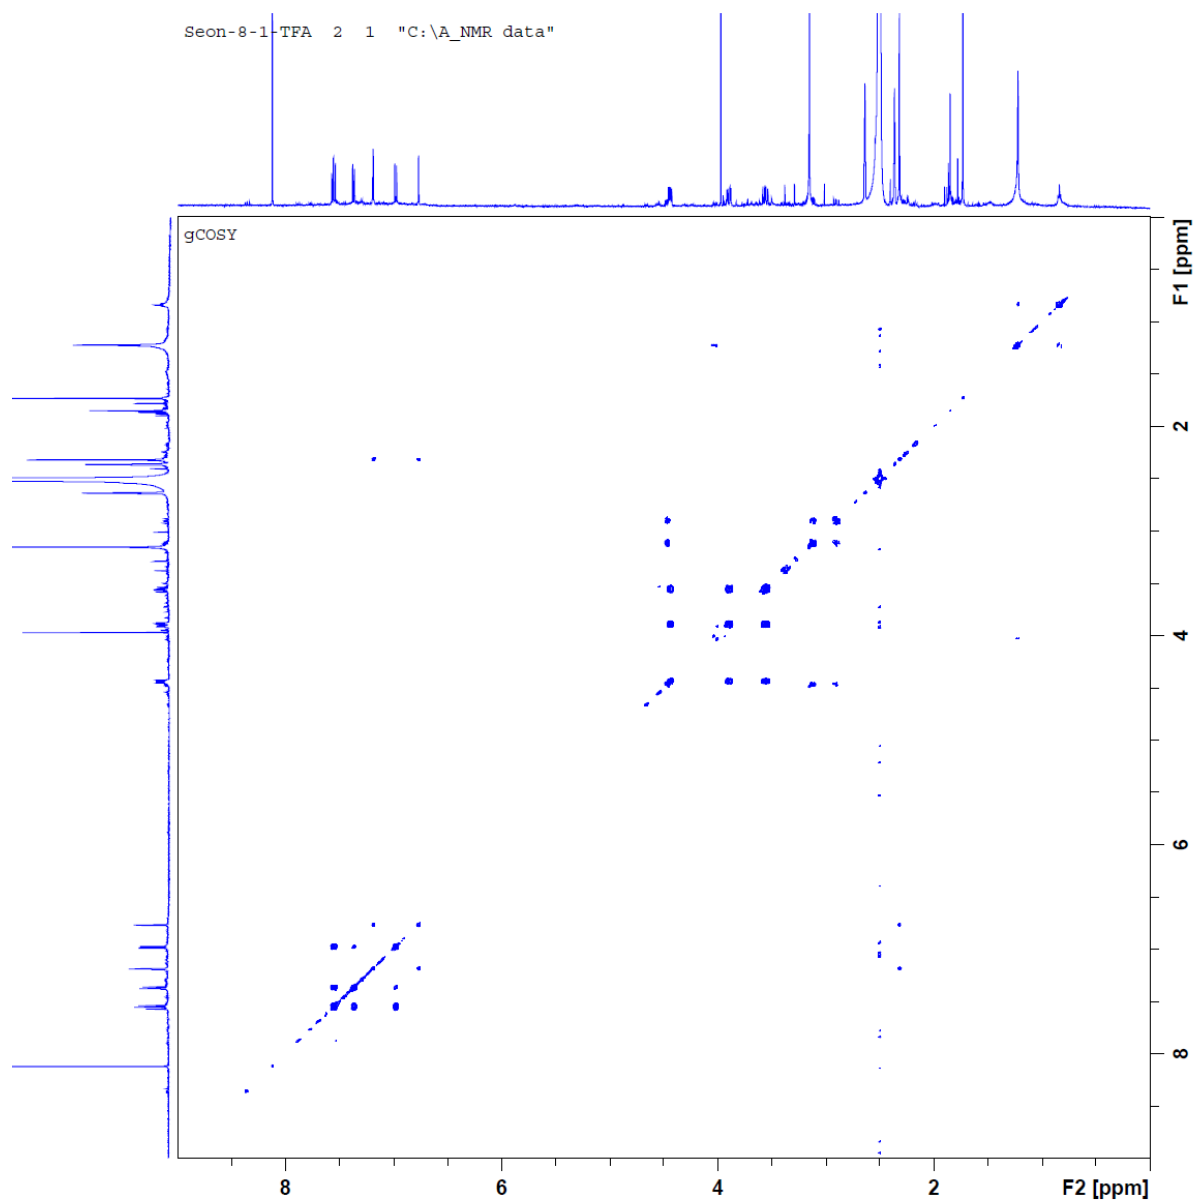

**Figure S26.**  $^1\text{H}$ - $^1\text{H}$  COSY spectrum of seongomycin in  $\text{DMSO-}d_6$  + 1 drop TFA- $d$ .

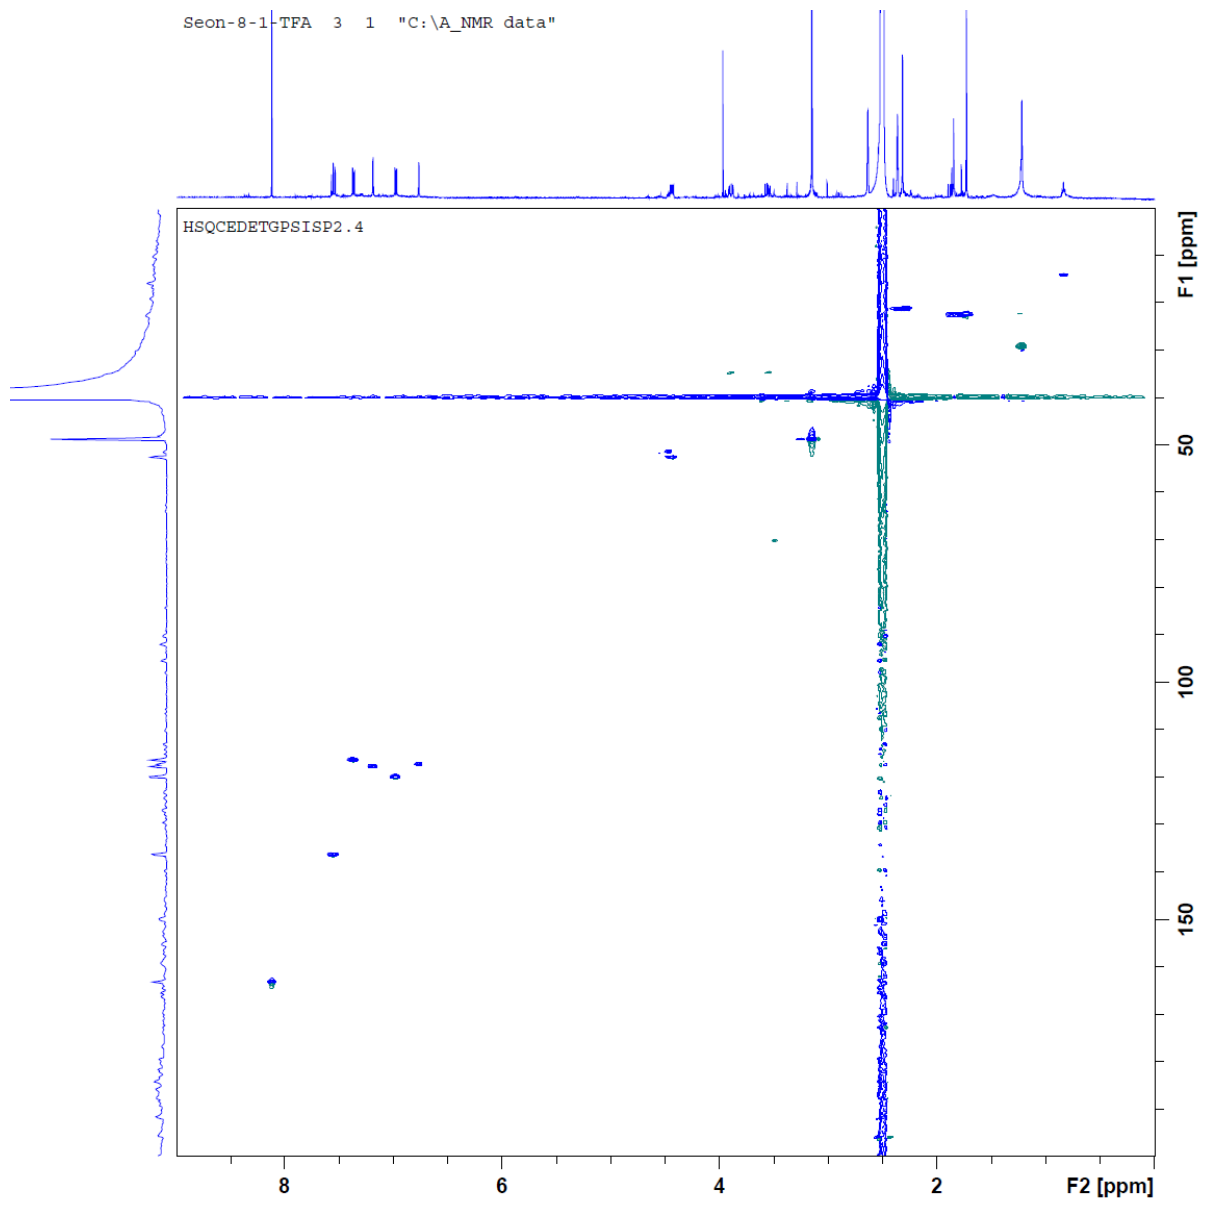

**Figure S27.**  $^1\text{H}$ - $^{13}\text{C}$  HSQC spectrum of seongomycin in  $\text{DMSO-}d_6$  + 1 drop  $\text{TFA-}d$ .

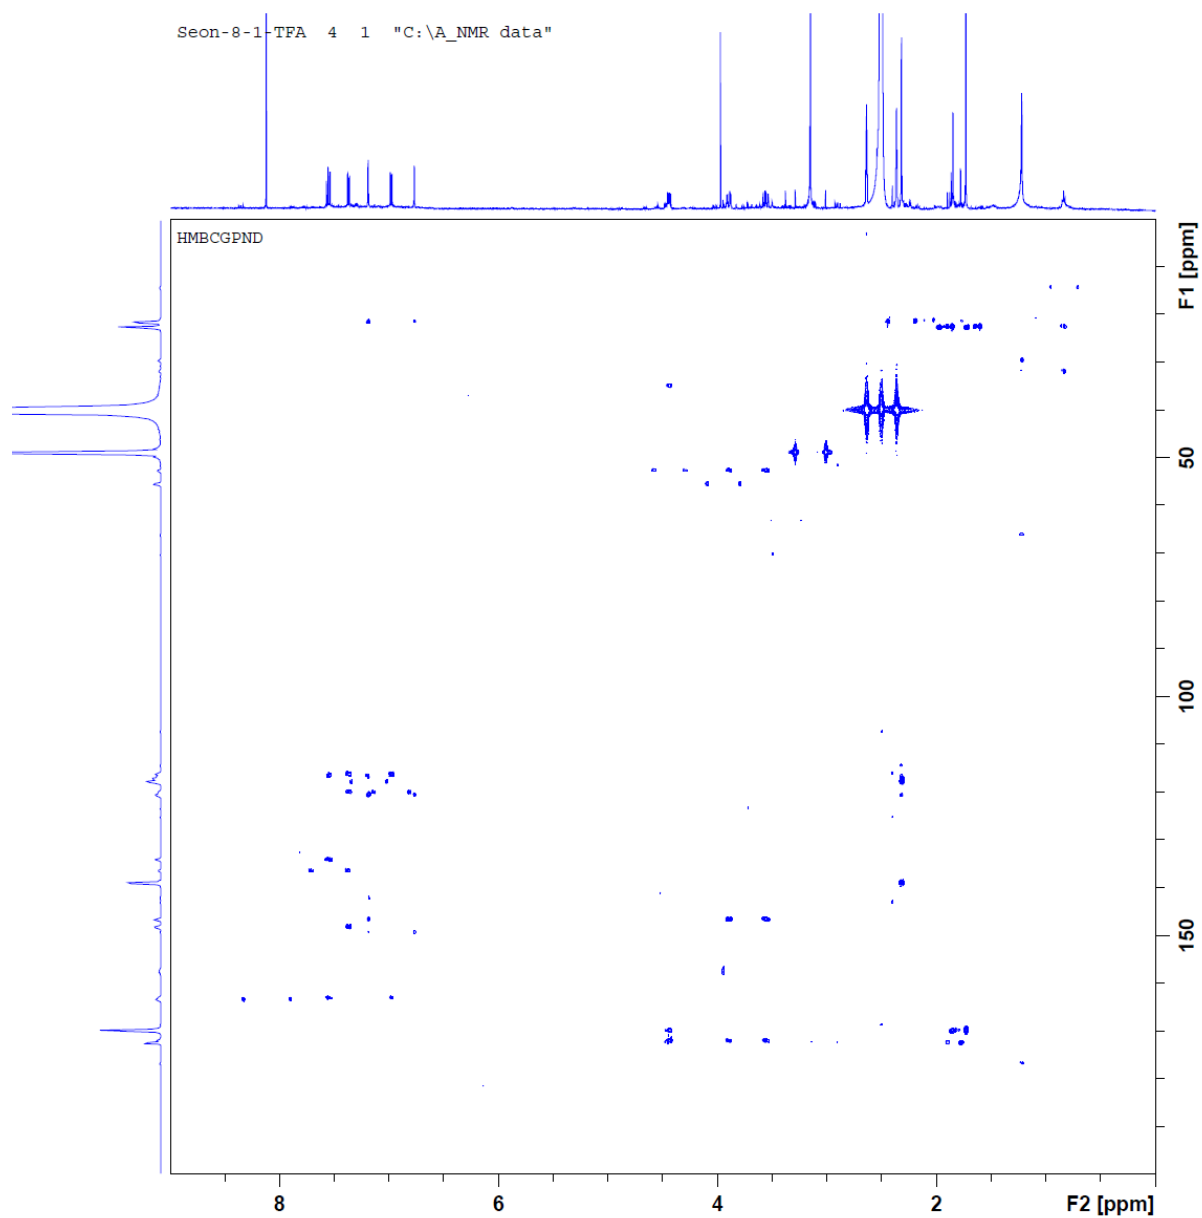

**Figure S28.**  $^1\text{H}$ - $^{13}\text{C}$  HMBC spectrum of seongomycin in  $\text{DMSO-}d_6$  + 1 drop  $\text{TFA-}d$ .

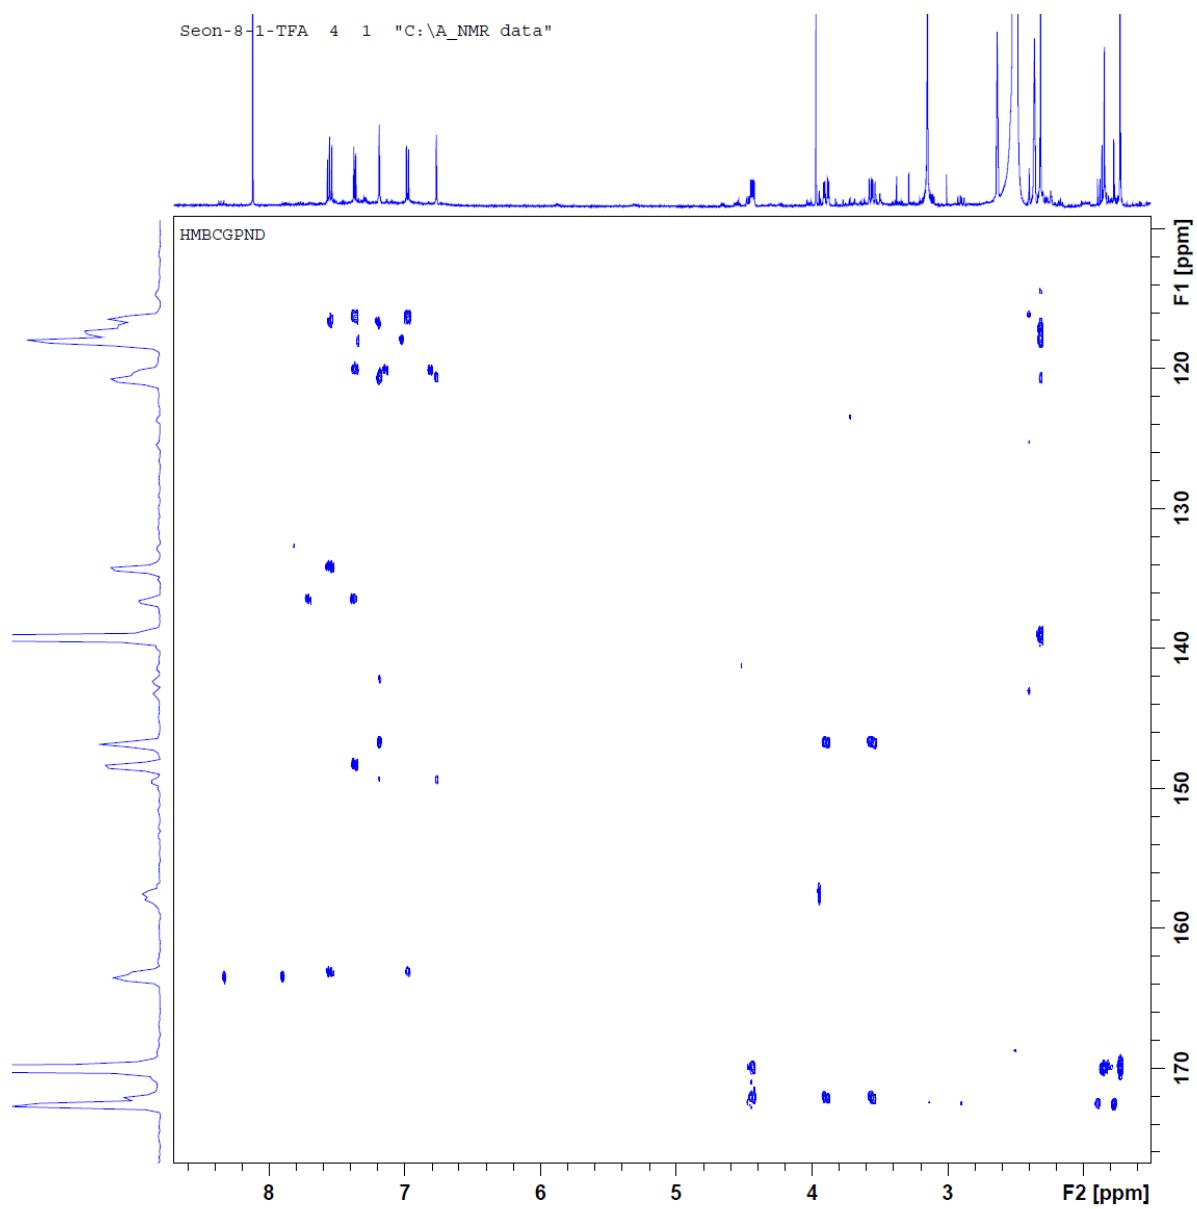

**Figure S29.** Magnified  $^1\text{H}$ - $^{13}\text{C}$  HMBC spectrum of seongomycin.



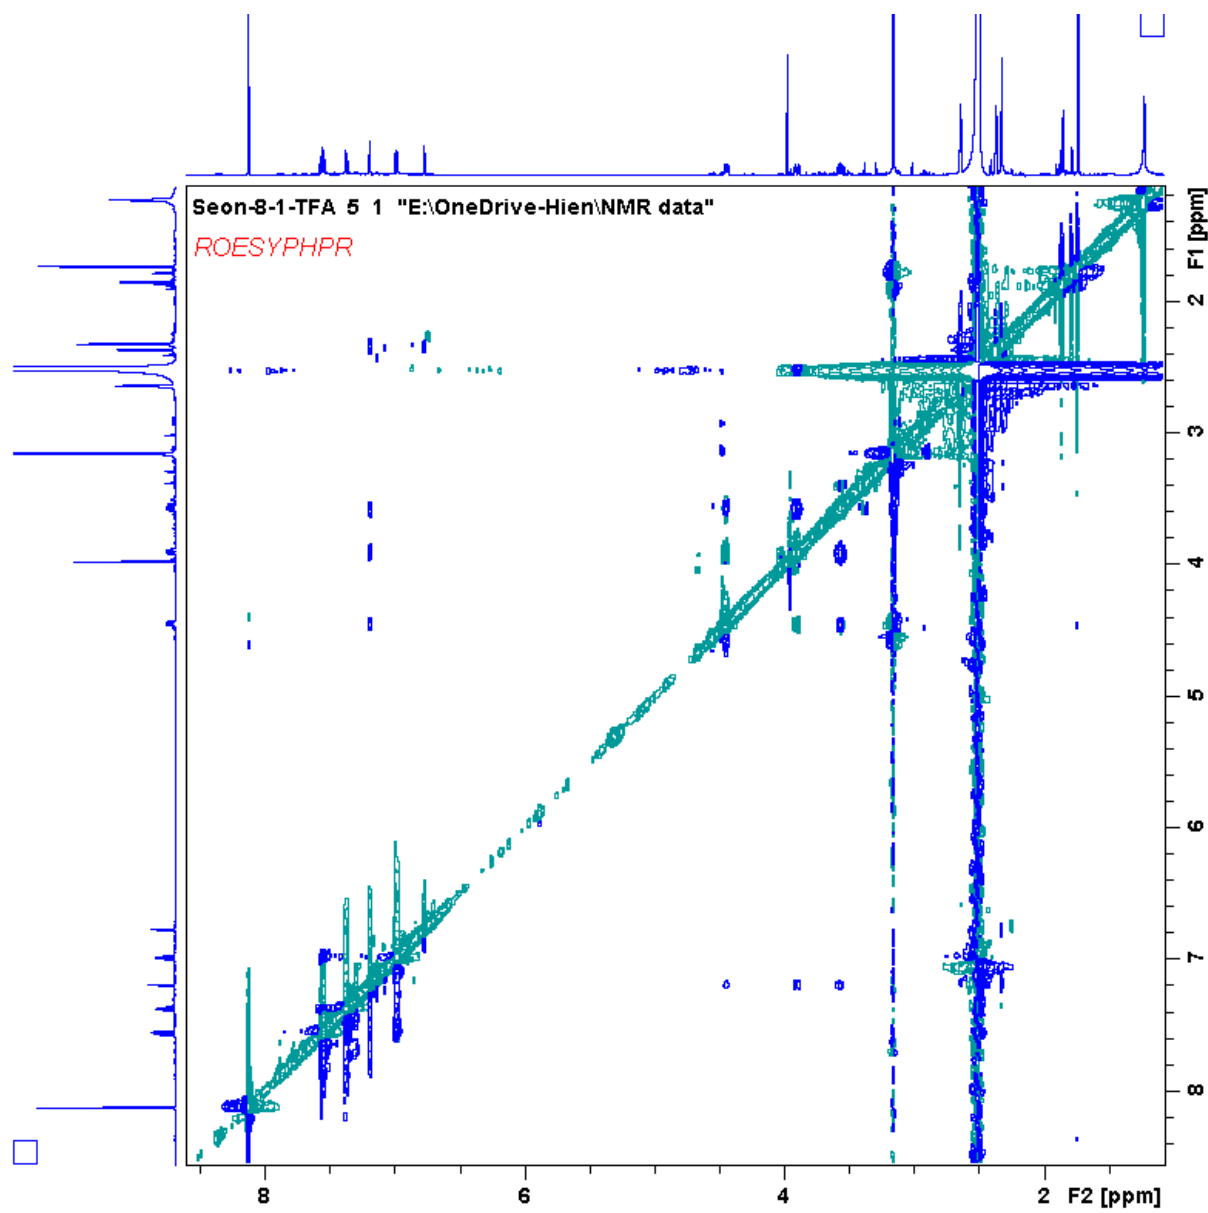

**Figure S30.**  $^1\text{H}$ - $^1\text{H}$  ROESY spectrum of seongomycin in  $\text{DMSO-}d_6$  + 1 drop  $\text{TFA-}d$ .

Seon-8-1-TFA 5 1 "C:\A\_NMR data"

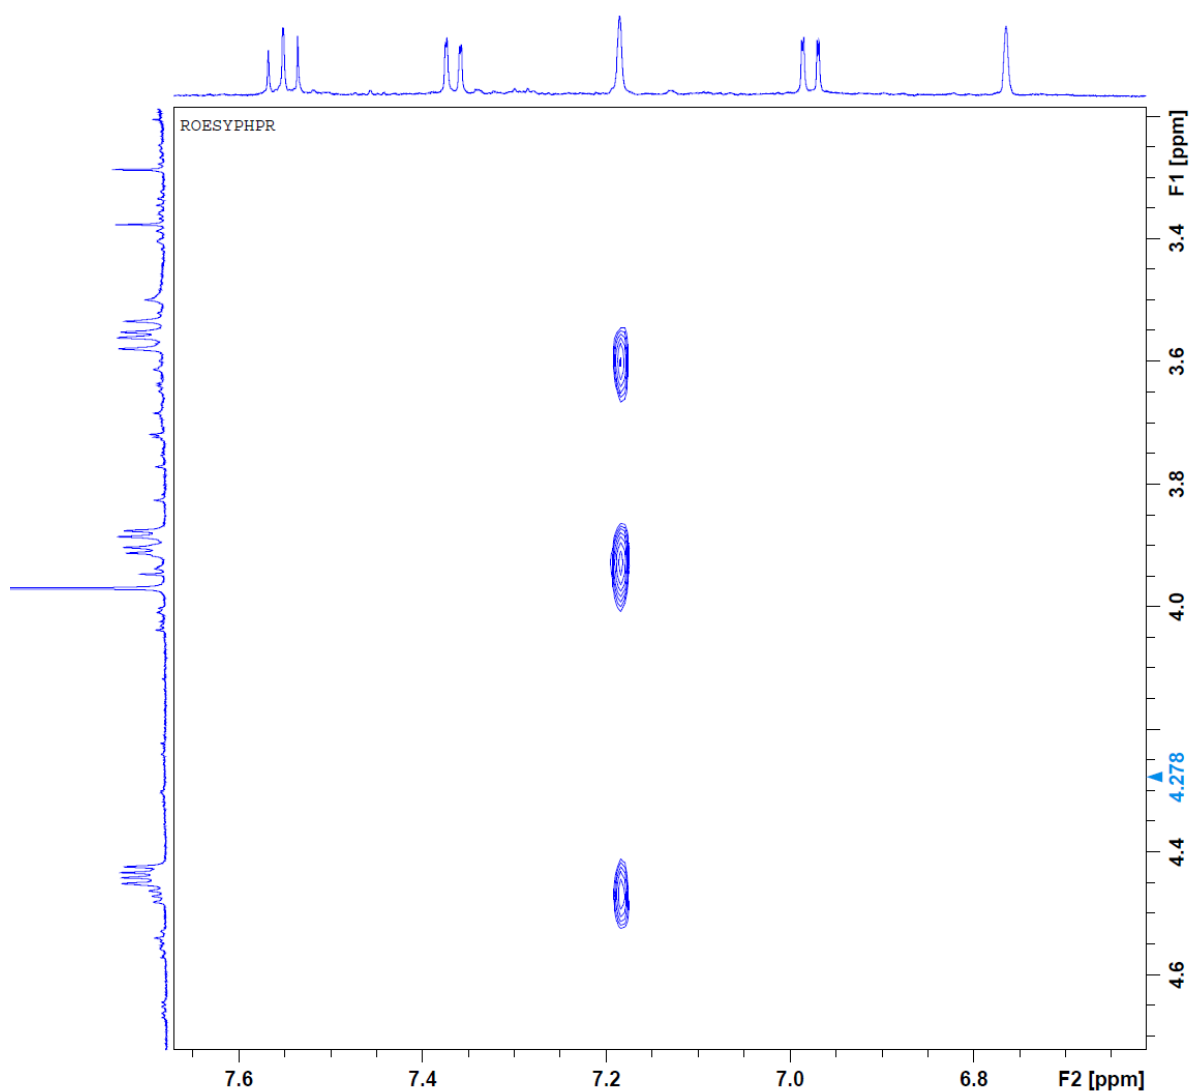

**Figure S31.** Key  $^1\text{H}$ - $^{13}\text{C}$  ROESY correlations between H-1 (7.18 ppm), H-13 (3.89 and 3.55 ppm) and H-14 (4.43 ppm), confirming the position of H-1 on the aromatic ring.

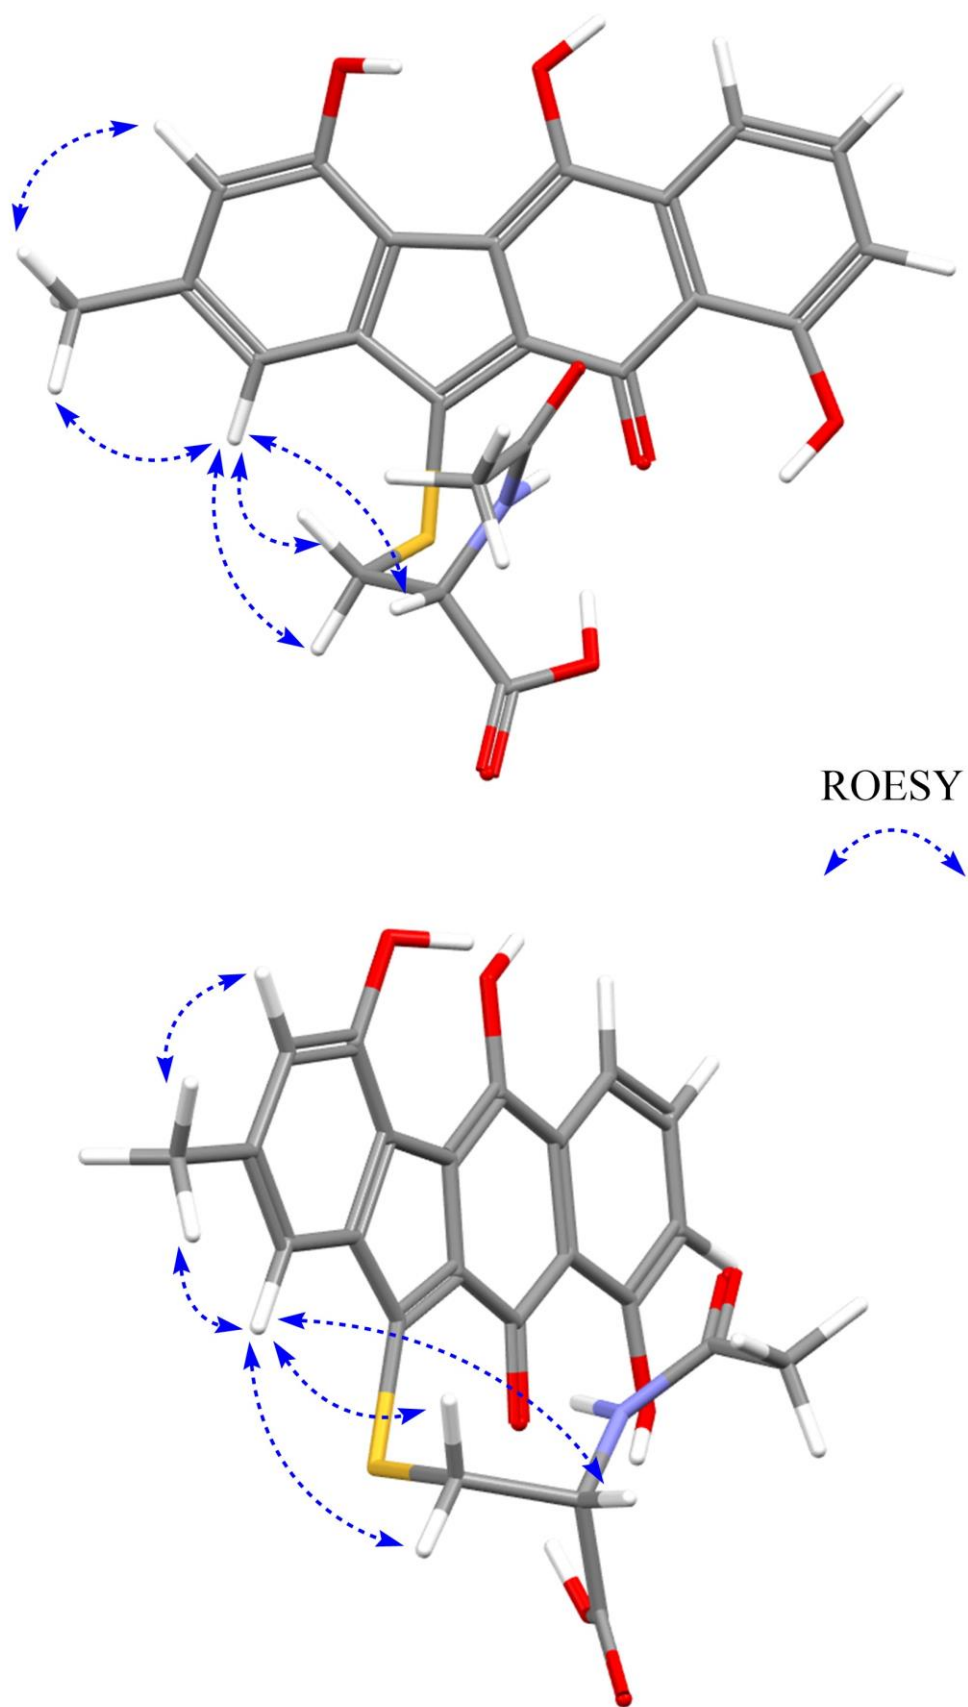

**Figure S32.** 3D representation of the observed NOE effects for seongomycin.

**Table S10.** Experimental and calculated <sup>1</sup>H and <sup>13</sup>C chemical shifts of seongomycin.

| <b>Position</b>   | <b>Calculated<br/>ppm</b> | <b>Experimental<br/>ppm</b> | <b>Error<br/>Δ ppm</b> | <b>Experimental<br/>(literature)</b> | <b>Error<br/>(literature)<br/>Δ ppm</b> |
|-------------------|---------------------------|-----------------------------|------------------------|--------------------------------------|-----------------------------------------|
| 2-CH <sub>3</sub> | 20.9                      | 21.5                        | 0.6                    | 21.3                                 | 0.4                                     |
| C-4               | 146.3                     | 149.4                       | 3.1                    | 149.2                                | 2.9                                     |
| C-3               | 114.9                     | 117.3                       | 2.4                    | 117.1                                | 2.2                                     |
| C-2               | 138.8                     | 139.0                       | 0.2                    | 138.7                                | 0.1                                     |
| C-1               | 116.2                     | 117.8                       | 1.6                    | 117.4                                | 1.2                                     |
| C-4a              | 117.0                     | 120.6                       | 3,6                    | 120.5                                | 3.5                                     |
| C-11a             | 141.5                     | 142.6                       | 1,1                    | 141.8                                | 0.3                                     |
| C-11              | 151.0                     | 146.7                       | 4.3                    | 146.1                                | 4.9                                     |
| C-5               | 148.8                     | 148.3                       | 0.5                    | 148.2                                | 0.6                                     |
| C-4b              | 112.8                     | -                           | -                      | 114.1                                | 1.3                                     |
| C-10a             | 128.0                     | -                           | -                      | 128.4                                | 0.4                                     |
| C-10              | 180.6                     | -                           | -                      | 184.0                                | 3.4                                     |
| C-6               | 114.7                     | 116.4                       | 1.7                    | 116.1                                | 1.4                                     |
| C-5a              | 132.0                     | 134.2                       | 2.2                    | 133.9                                | 1.9                                     |
| C-9a              | 114.7                     | 116.2                       | 1.5                    | 116.0                                | 1.3                                     |
| C-9               | 162.2                     | 163.1                       | 0.9                    | 163.1                                | 0.9                                     |
| C-8               | 119.2                     | 119.9                       | 0.7                    | 119.7                                | 0.5                                     |
| C-7               | 134.5                     | 136.4                       | 0.9                    | 135.9                                | 1.4                                     |
| 2-CH <sub>3</sub> | 2.30                      | 2.32                        | 0.02                   | 2.27                                 | 0.03                                    |
| 2-CH <sub>3</sub> | 2.30                      | 2.32                        | 0.02                   | 2.27                                 | 0.03                                    |
| 2-CH <sub>3</sub> | 2.30                      | 2.32                        | 0.02                   | 2.27                                 | 0.03                                    |
| H-3               | 6.56                      | 6.76                        | 0.2                    | 6.70                                 | 0.14                                    |
| H-1               | 7.06                      | 7.18                        | 0.12                   | 7.12                                 | 0.06                                    |
| H-6               | 7.21                      | 7.36                        | 0.15                   | 7.30                                 | 0.09                                    |
| H-8               | 6.79                      | 6.98                        | 0.19                   | 6.91                                 | 0.12                                    |
| H-7               | 7.31                      | 7.55                        | 0.24                   | 7.50                                 | 0.19                                    |

**Table S11.** Computed and experimental  $^{13}\text{C}$  chemical shift values of the revised structure of maduralactomycin A by Guo et al.<sup>15</sup> DFT calculation of  $^{13}\text{C}$  chemical shift values of the previously proposed structure pinpoint significant errors at the positions C-8, C-11, C-16, and C-17, indicating an incorrect assignment of the planar structure.

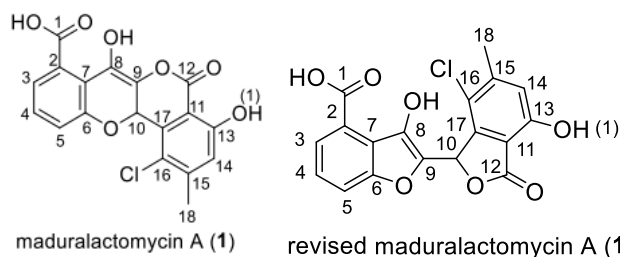

| Position | Calc + Assignment | Exp + Assignment | Error       |
|----------|-------------------|------------------|-------------|
| C-3      | 127.8             | 125.6            | 2.2         |
| C-4      | 128.2             | 125.2            | 3.0         |
| C-5      | 123.0             | 115.5            | 7.5         |
| C-6      | 152.2             | 152.5            | 0.3         |
| C-7      | 124.9             | 122.1            | 2.8         |
| C-2      | 121.8             | 127.6            | 5.8         |
| C-10     | 66.7              | 71.8             | 5.1         |
| C-9      | 125.5             | 129.2            | 3.7         |
| C-8      | 132.2             | 141.2            | <b>9.0</b>  |
| C-17     | 131.2             | 145.5            | <b>14.3</b> |
| C-11     | 104.5             | 117.2            | <b>12.7</b> |
| C-12     | 162.5             | 166.7            | 4.2         |
| C-16     | 130.2             | 111.7            | <b>18.5</b> |
| C-15     | 149.7             | 144.6            | 5.1         |
| C-14     | 119.5             | 119.3            | 0.2         |
| C-13     | 159.6             | 155.3            | 4.3         |
| C-1      | 169.4             | 170.1            | 0.7         |
| 15-CH3   | 22.5              | 19.6             | 2.9         |

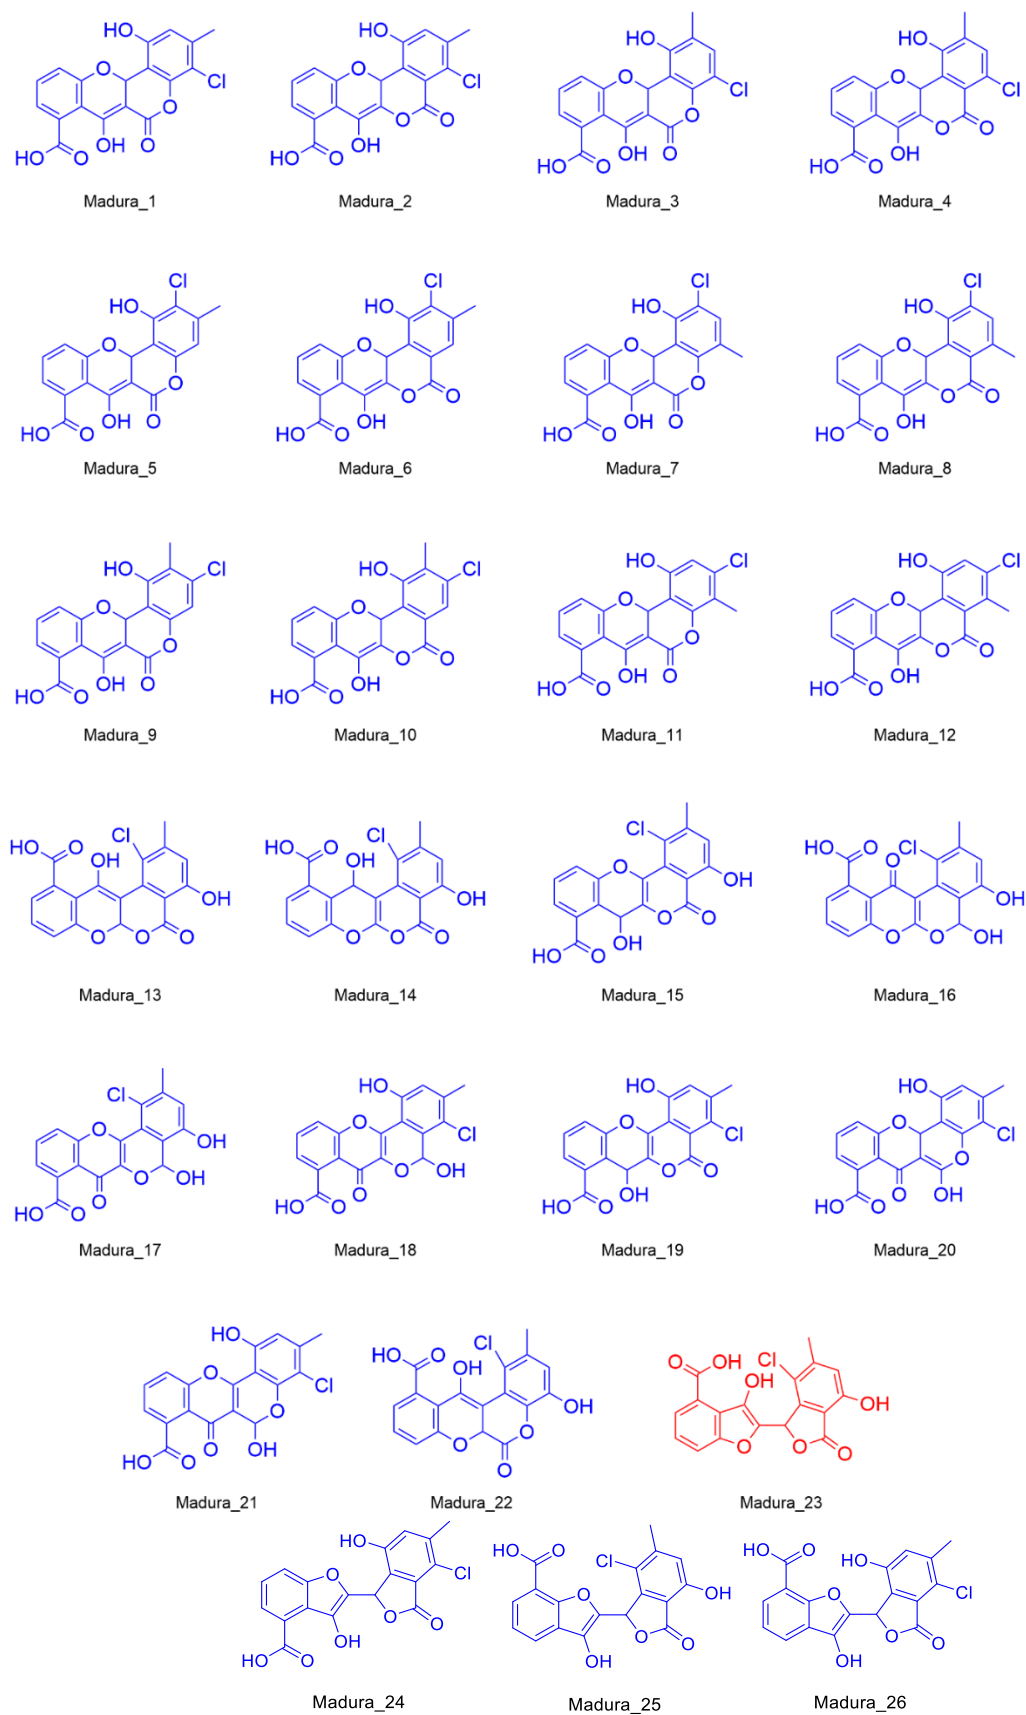

**Figure S33.** Chemical structures (26) used to compute chemical shifts by extensive DFT calculations.

**Table S12.** Calculated <sup>13</sup>C chemical shifts of the proposed structures named Madura-1 to Madura-12, ranging from the largest to smallest shifts (ppm)

| <b>Exp</b> | <b>Ma-<br/>dura-1</b> | <b>Ma-<br/>dura-2</b> | <b>Madura-<br/>3</b> | <b>Madura-<br/>4</b> | <b>Madura-<br/>5</b> | <b>Madura-<br/>6</b> | <b>Madura-<br/>7</b> | <b>Madura-<br/>8</b> | <b>Madura-<br/>9</b> | <b>Madura-<br/>10</b> | <b>Madura-<br/>11</b> | <b>Madura-<br/>12</b> |
|------------|-----------------------|-----------------------|----------------------|----------------------|----------------------|----------------------|----------------------|----------------------|----------------------|-----------------------|-----------------------|-----------------------|
| 170.1      | 167.4                 | 168.8                 | 167.4                | 168.8                | 167.3                | 168.8                | 167.2                | 168.9                | 167.4                | 168.7                 | 167.4                 | 169.0                 |
| 166.7      | 166.3                 | 154.9                 | 166.2                | 154.6                | 166.8                | 157.4                | 166.8                | 156.7                | 166.1                | 156.8                 | 166.1                 | 156.6                 |
| 155.3      | 162.6                 | 152.3                 | 162.4                | 151.8                | 163.1                | 150.6                | 162.8                | 150.3                | 163.0                | 152.9                 | 162.8                 | 152.1                 |
| 152.3      | 155.2                 | 149.8                 | 155.1                | 149.8                | 156.3                | 150.0                | 156.1                | 148.5                | 155.1                | 150.1                 | 155.1                 | 150.0                 |
| 145.6      | 154.0                 | 143.0                 | 153.1                | 136.7                | 150.6                | 140.7                | 148.9                | 137.8                | 154.0                | 142.7                 | 153.6                 | 142.9                 |
| 144.7      | 144.8                 | 133.9                 | 142.9                | 133.7                | 147.9                | 134.3                | 147.1                | 133.3                | 146.5                | 133.9                 | 147.1                 | 134.3                 |
| 141.1      | 142.1                 | 129.6                 | 135.0                | 133.5                | 141.2                | 130.6                | 134.9                | 133.1                | 143.1                | 130.5                 | 143.4                 | 129.8                 |
| 129.1      | 135.1                 | 127.8                 | 132.1                | 129.7                | 134.8                | 127.8                | 131.3                | 129.9                | 134.9                | 127.9                 | 135.0                 | 128.2                 |
| 127.6      | 130.3                 | 127.4                 | 130.3                | 127.7                | 129.9                | 127.5                | 129.9                | 128.0                | 130.3                | 127.7                 | 130.2                 | 127.4                 |
| 125.6      | 124.4                 | 126.9                 | 124.4                | 127.6                | 124.0                | 126.7                | 124.1                | 127.5                | 124.4                | 126.6                 | 124.4                 | 127.4                 |
| 125.3      | 119.9                 | 124.9                 | 123.7                | 126.5                | 121.3                | 123.6                | 120.3                | 127.1                | 121.2                | 123.4                 | 119.9                 | 124.3                 |
| 122.1      | 117.3                 | 123.7                 | 119.9                | 123.4                | 120.3                | 122.6                | 119.8                | 124.2                | 119.9                | 122.9                 | 117.0                 | 123.6                 |
| 119.4      | 116.6                 | 122.3                 | 116.6                | 122.7                | 116.9                | 122.6                | 119.2                | 122.0                | 116.6                | 121.6                 | 116.6                 | 121.9                 |
| 117.2      | 113.3                 | 121.3                 | 116.1                | 121.1                | 109.0                | 121.5                | 116.9                | 121.6                | 108.0                | 121.2                 | 112.1                 | 121.6                 |
| 115.6      | 102.6                 | 119.3                 | 104.5                | 120.2                | 102.5                | 118.9                | 104.9                | 121.6                | 102.4                | 118.7                 | 102.7                 | 120.8                 |
| 111.6      | 86.3                  | 118.3                 | 86.5                 | 115.5                | 86.4                 | 117.8                | 86.3                 | 117.7                | 86.9                 | 117.4                 | 86.4                  | 119.8                 |
| 71.9       | 72.1                  | 69.1                  | 72.2                 | 69.1                 | 70.2                 | 68.1                 | 70.6                 | 68.7                 | 72.0                 | 68.7                  | 72.1                  | 69.1                  |
| 19.6       | 21.7                  | 22.2                  | 16.6                 | 17.9                 | 21.4                 | 21.2                 | 16.5                 | 24.0                 | 11.9                 | 13.3                  | 12.2                  | 19.5                  |

**Table S13.** Calculated  $^{13}\text{C}$  chemical shifts of the proposed structures Madura-13 to Madura-23, ranging from the largest to smallest shifts (ppm)

| <b>Exp</b> | <b>Madura-13</b> | <b>Madura-14</b> | <b>Madura-15</b> | <b>Madura-16</b> | <b>Madura-17</b> | <b>Madura-18</b> | <b>Madura-19</b> | <b>Madura-20</b> | <b>Madura-21</b> | <b>Madura-22</b> | <b>Madura-23</b> |
|------------|------------------|------------------|------------------|------------------|------------------|------------------|------------------|------------------|------------------|------------------|------------------|
| 170.1      | 170.9            | 167.3            | 167.5            | 174.6            | 169.6            | 168.7            | 167.2            | 179.6            | 172.5            | 171.2            | 170.3            |
| 166.7      | 165.8            | 161.8            | 163.1            | 163.9            | 162.7            | 162.5            | 156.2            | 167.5            | 162.3            | 164.2            | 169.3            |
| 155.3      | 159.0            | 160.3            | 159.6            | 162.3            | 153.6            | 153.2            | 150.2            | 164.4            | 156.9            | 154.2            | 154.1            |
| 152.3      | 152.3            | 152.3            | 151.2            | 151.5            | 149.9            | 152.4            | 147.8            | 156.4            | 154.3            | 144.7            | 151.1            |
| 145.6      | 148.0            | 151.7            | 148.6            | 149.2            | 148.1            | 148.3            | 142.6            | 154.0            | 153.7            | 141.0            | 148.6            |
| 144.7      | 146.4            | 147.1            | 136.0            | 142.3            | 142.7            | 146.4            | 134.1            | 143.3            | 150.0            | 135.5            | 142.1            |
| 141.1      | 134.8            | 134.1            | 133.6            | 133.1            | 134.7            | 134.0            | 133.8            | 142.1            | 148.0            | 133.3            | 141.5            |
| 129.1      | 129.4            | 128.8            | 128.0            | 131.8            | 133.7            | 132.4            | 133.8            | 135.3            | 134.1            | 129.3            | 130.3            |
| 127.6      | 129.1            | 128.0            | 127.8            | 131.7            | 132.3            | 131.8            | 128.3            | 132.6            | 133.3            | 128.1            | 127.4            |
| 125.6      | 128.1            | 125.9            | 127.2            | 128.2            | 131.3            | 131.3            | 128.1            | 125.2            | 132.3            | 127.4            | 124.4            |
| 125.3      | 124.5            | 125.4            | 125.6            | 125.9            | 128.5            | 129.6            | 126.1            | 120.4            | 122.6            | 124.0            | 123.9            |
| 122.1      | 122.4            | 124.0            | 123.9            | 122.2            | 123.7            | 128.5            | 124.6            | 120.1            | 121.8            | 122.3            | 121.9            |
| 119.4      | 118.3            | 122.2            | 123.9            | 122.1            | 121.9            | 122.7            | 124.0            | 117.9            | 118.7            | 122.0            | 118.7            |
| 117.2      | 116.8            | 114.9            | 123.3            | 115.6            | 121.4            | 121.5            | 122.3            | 114.4            | 111.0            | 119.1            | 118.6            |
| 115.6      | 107.6            | 103.8            | 117.9            | 114.8            | 121.2            | 119.3            | 117.6            | 103.4            | 108.3            | 115.1            | 117.6            |
| 111.6      | 98.6             | 91.4             | 105.0            | 100.3            | 117.2            | 106.2            | 115.6            | 84.3             | 99.1             | 95.8             | 110.0            |
| 71.9       | 96.6             | 58.7             | 60.6             | 94.5             | 91.6             | 89.3             | 60.0             | 70.5             | 88.9             | 72.8             | 74.4             |
| 19.6       | 22.6             | 24.0             | 23.7             | 22.0             | 22.1             | 22.2             | 22.6             | 21.6             | 22.3             | 21.4             | 21.7             |



**Table S14.** Errors between experimental and calculated chemical shifts of the proposed structures Madura-1 to Madura-12 (ppm)

| <b>Error</b> | <b>Madura-1</b> | <b>Madura-2</b> | <b>Madura-3</b> | <b>Madura-4</b> | <b>Madura-5</b> | <b>Madura-6</b> | <b>Madura-7</b> | <b>Madura-8</b> | <b>Madura-9</b> | <b>Madura-10</b> | <b>Madura-11</b> | <b>Madura-12</b> |
|--------------|-----------------|-----------------|-----------------|-----------------|-----------------|-----------------|-----------------|-----------------|-----------------|------------------|------------------|------------------|
|              | 2.7             | 1.3             | 2.7             | 1.3             | 2.8             | 1.3             | 2.9             | 1.2             | 2.7             | 1.4              | 2.7              | 1.1              |
|              | 0.4             | 11.8            | 0.5             | 12.1            | 0.1             | 9.3             | 0.1             | 10.0            | 0.6             | 9.9              | 0.6              | 10.1             |
|              | 7.3             | 3.0             | 7.1             | 3.5             | 7.8             | 4.7             | 7.5             | 5.0             | 7.7             | 2.4              | 7.5              | 3.2              |
|              | 2.9             | 2.5             | 2.8             | 2.5             | 4.0             | 2.3             | 3.8             | 3.8             | 2.8             | 2.2              | 2.8              | 2.3              |
|              | 8.4             | 2.6             | 7.5             | 8.9             | 5.0             | 4.9             | 3.3             | 7.8             | 8.4             | 2.9              | 8.0              | 2.7              |
|              | 0.1             | 10.8            | 1.8             | 11.0            | 3.2             | 10.4            | 2.4             | 11.4            | 1.8             | 10.8             | 2.4              | 10.4             |
|              | 1.0             | 11.5            | 6.1             | 7.6             | 0.1             | 10.5            | 6.2             | 8.0             | 2.0             | 10.6             | 2.3              | 11.3             |
|              | 6.0             | 1.3             | 3.0             | 0.6             | 5.7             | 1.3             | 2.2             | 0.8             | 5.8             | 1.2              | 5.9              | 0.9              |
|              | 2.7             | 0.2             | 2.7             | 0.1             | 2.3             | 0.1             | 2.3             | 0.4             | 2.7             | 0.1              | 2.6              | 0.2              |
|              | 1.2             | 1.3             | 1.2             | 2.0             | 1.6             | 1.1             | 1.5             | 1.9             | 1.2             | 1.0              | 1.2              | 1.8              |
|              | 5.4             | 0.4             | 1.6             | 1.2             | 4.0             | 1.7             | 5.0             | 1.8             | 4.1             | 1.9              | 5.4              | 1.0              |
|              | 4.8             | 1.6             | 2.2             | 1.3             | 1.8             | 0.5             | 2.3             | 2.1             | 2.2             | 0.8              | 5.1              | 1.5              |
|              | 2.8             | 2.9             | 2.8             | 3.3             | 2.5             | 3.2             | 0.2             | 2.6             | 2.8             | 2.2              | 2.8              | 2.5              |
|              | 3.9             | 4.1             | 1.1             | 3.9             | 8.2             | 4.3             | 0.3             | 4.4             | 9.2             | 4.0              | 5.1              | 4.4              |
|              | 13.0            | 3.7             | 11.1            | 4.6             | 13.1            | 3.3             | 10.7            | 6.0             | 13.2            | 3.1              | 12.9             | 5.2              |
|              | 25.3            | 6.7             | 25.1            | 3.9             | 25.2            | 6.2             | 25.3            | 6.1             | 24.7            | 5.8              | 25.2             | 8.2              |
|              | 0.2             | 2.8             | 0.3             | 2.8             | 1.7             | 3.8             | 1.3             | 3.2             | 0.1             | 3.2              | 0.2              | 2.8              |
|              | 2.1             | 2.6             | 3.0             | 1.7             | 1.8             | 1.6             | 3.1             | 4.4             | 7.7             | 6.3              | 7.4              | 0.1              |
| <b>CMAE*</b> | <b>5.0</b>      | <b>3.9</b>      | <b>4.6</b>      | <b>4.0</b>      | <b>5.0</b>      | <b>3.9</b>      | <b>4.5</b>      | <b>4.5</b>      | <b>5.5</b>      | <b>3.9</b>       | <b>5.6</b>       | <b>3.9</b>       |
| <b>MAE*</b>  | <b>25.3</b>     | <b>11.8</b>     | <b>25.1</b>     | <b>12.1</b>     | <b>25.2</b>     | <b>10.5</b>     | <b>25.3</b>     | <b>11.4</b>     | <b>24.7</b>     | <b>10.8</b>      | <b>25.2</b>      | <b>11.3</b>      |

**Table S15.** Errors between experimental and calculated chemical shifts of the proposed structures Madura-13 to Madura-23 (ppm)

| Error        |  |  | Madura-13   | Madura-14   | Madura-15   | Madura-16   | Madura-17   | Madura-18   | Madura-19   | Madura-20   | Madura-21   | Madura-22   | Madura-23  |
|--------------|--|--|-------------|-------------|-------------|-------------|-------------|-------------|-------------|-------------|-------------|-------------|------------|
|              |  |  | 0.8         | 2.8         | 2.6         | 4.5         | 0.5         | 1.4         | 2.9         | 9.5         | 2.4         | 1.1         | 0.2        |
|              |  |  | 0.9         | 4.9         | 3.6         | 2.8         | 4.0         | 4.2         | 10.5        | 0.8         | 4.4         | 2.5         | 2.6        |
|              |  |  | 3.7         | 5.0         | 4.3         | 7.0         | 1.7         | 2.1         | 5.1         | 9.1         | 1.6         | 1.1         | 1.2        |
|              |  |  | 0.0         | 0.0         | 1.1         | 0.8         | 2.4         | 0.1         | 4.5         | 4.1         | 2.0         | 7.6         | 1.2        |
|              |  |  | 2.4         | 6.1         | 3.0         | 3.6         | 2.5         | 2.7         | 3.0         | 8.4         | 8.1         | 4.6         | 3.0        |
|              |  |  | 1.7         | 2.4         | 8.7         | 2.4         | 2.0         | 1.7         | 10.6        | 1.4         | 5.3         | 9.2         | 2.6        |
|              |  |  | 6.3         | 7.0         | 7.5         | 8.0         | 6.4         | 7.1         | 7.3         | 1.0         | 6.9         | 7.8         | 0.4        |
|              |  |  | 0.3         | 0.3         | 1.1         | 2.7         | 4.6         | 3.3         | 4.7         | 6.2         | 5.0         | 0.2         | 1.2        |
|              |  |  | 1.5         | 0.4         | 0.2         | 4.1         | 4.7         | 4.2         | 0.7         | 5.0         | 5.7         | 0.5         | 0.2        |
|              |  |  | 2.5         | 0.3         | 1.6         | 2.6         | 5.7         | 5.7         | 2.5         | 0.4         | 6.7         | 1.8         | 1.2        |
|              |  |  | 0.8         | 0.1         | 0.3         | 0.6         | 3.2         | 4.3         | 0.8         | 4.9         | 2.7         | 1.3         | 1.4        |
|              |  |  | 0.3         | 1.9         | 1.8         | 0.1         | 1.6         | 6.4         | 2.5         | 2.0         | 0.3         | 0.2         | 0.2        |
|              |  |  | 1.1         | 2.8         | 4.5         | 2.7         | 2.5         | 3.3         | 4.6         | 1.5         | 0.7         | 2.6         | 0.7        |
|              |  |  | 0.4         | 2.3         | 6.1         | 1.6         | 4.2         | 4.3         | 5.1         | 2.8         | 6.2         | 1.9         | 1.4        |
|              |  |  | 8.0         | 11.8        | 2.3         | 0.8         | 5.6         | 3.7         | 2.0         | 12.2        | 7.3         | 0.5         | 2.0        |
|              |  |  | 13.0        | 20.2        | 6.6         | 11.3        | 5.6         | 5.4         | 4.0         | 27.3        | 12.5        | 15.8        | 1.6        |
|              |  |  | 24.7        | 13.2        | 11.3        | 22.6        | 19.7        | 17.4        | 11.9        | 1.4         | 17.0        | 0.9         | 2.5        |
|              |  |  | 3.0         | 4.4         | 4.1         | 2.4         | 2.5         | 2.6         | 3.0         | 2.0         | 2.7         | 1.8         | 2.1        |
| <b>CMAE*</b> |  |  | <b>4.0</b>  | <b>4.8</b>  | <b>3.9</b>  | <b>4.5</b>  | <b>4.4</b>  | <b>4.4</b>  | <b>4.8</b>  | <b>5.6</b>  | <b>5.4</b>  | <b>3.4</b>  | <b>1.4</b> |
| <b>MAE*</b>  |  |  | <b>24.7</b> | <b>20.2</b> | <b>11.3</b> | <b>22.6</b> | <b>19.7</b> | <b>17.4</b> | <b>11.9</b> | <b>27.3</b> | <b>17.0</b> | <b>15.8</b> | <b>3.0</b> |

\*CMAE = Computed mean absolute error

\*MAE = Maximum absolute error

**Table S16.** Calculated  $^{13}\text{C}$  chemical shifts and errors of the proposed structures Madura-23 to Madura-26, ranging from the largest to smallest shifts (ppm) and calculated errors between experimental and calculated chemical shifts of the proposed structures Madura-13 to Madura-23 (ppm).

| Exp          | Madura-23 | Madura-24 | Madura-25 | Madura-26 | Errors-23  | Errors-24  | Errors-25  | Errors-26  |
|--------------|-----------|-----------|-----------|-----------|------------|------------|------------|------------|
| 170.1        | 170.3     | 169.6     | 170.2     | 165.6     | <b>0.2</b> | 0.5        | 1.8        | 4.5        |
| 166.7        | 169.3     | 166.5     | 163.5     | 163.7     | <b>2.6</b> | 0.2        | 3.6        | 3.0        |
| 155.3        | 154.1     | 150.6     | 154.1     | 149.6     | <b>1.2</b> | 4.7        | 1.8        | 5.7        |
| 152.3        | 151.1     | 148.3     | 149.7     | 148.4     | <b>1.2</b> | 4.0        | 3.6        | 3.9        |
| 145.6        | 148.6     | 141.6     | 148.8     | 142.0     | <b>3.0</b> | 4.0        | 1.8        | 3.6        |
| 144.7        | 142.1     | 136.0     | 142.2     | 135.6     | <b>2.6</b> | 8.7        | 3.6        | 9.1        |
| 141.1        | 141.5     | 133.5     | 140.0     | 132.4     | <b>0.3</b> | 7.7        | 1.8        | 8.8        |
| 129.1        | 130.3     | 130.7     | 129.8     | 130.1     | <b>1.2</b> | 1.6        | 3.6        | 1.0        |
| 127.6        | 127.4     | 128.6     | 129.1     | 129.7     | <b>0.2</b> | 1.0        | 1.8        | 2.1        |
| 125.6        | 124.4     | 127.4     | 124.3     | 128.0     | <b>1.2</b> | 1.8        | 3.6        | 2.4        |
| 125.3        | 123.9     | 123.6     | 124.0     | 126.6     | <b>1.4</b> | 1.7        | 1.8        | 1.3        |
| 122.1        | 121.9     | 123.5     | 121.5     | 125.4     | <b>0.2</b> | 1.4        | 3.6        | 3.3        |
| 119.4        | 118.7     | 121.9     | 121.3     | 122.5     | <b>0.6</b> | 2.6        | 1.8        | 3.2        |
| 117.2        | 118.6     | 121.2     | 117.6     | 122.0     | <b>1.3</b> | 3.9        | 3.6        | 4.7        |
| 115.6        | 117.6     | 118.6     | 111.9     | 120.1     | <b>2.1</b> | 3.1        | 1.8        | 4.6        |
| 111.6        | 110.0     | 117.2     | 109.7     | 111.1     | <b>1.7</b> | 5.5        | 3.6        | 0.6        |
| 71.9         | 74.4      | 70.0      | 74.7      | 74.2      | <b>2.5</b> | 1.9        | 1.8        | 2.3        |
| 19.6         | 21.7      | 20.6      | 21.8      | 20.6      | <b>2.1</b> | 1.0        | 3.6        | 1.0        |
| <b>CMAE*</b> |           |           |           |           | <b>1.4</b> | <b>3.1</b> | <b>1.8</b> | <b>3.6</b> |
| <b>MAE*</b>  |           |           |           |           | <b>3.0</b> | <b>8.7</b> | <b>3.6</b> | <b>9.1</b> |

\*CMAE = Computed mean absolute error

\*MAE = Maximum absolute error

**Table S17.** Computed and experimental  $^{13}\text{C}$  chemical shift values of the revised structure of maduralactomycin A using atom numbering as stated in Tables S12-S16 of the computational approach.

| <b>Position</b>    | <b>Calc + Assignment</b> | <b>Exp + Assignment</b> | <b>Error (ppm)</b> |
|--------------------|--------------------------|-------------------------|--------------------|
| C-7                | 170.3                    | 170.1                   | 0.2                |
| C-8                | 169.3                    | 166.7                   | 2.6                |
| C-9                | 154.1                    | 155.3                   | 1.2                |
| C-7a               | 151.1                    | 152.3                   | 1.2                |
| C-11               | 148.6                    | 144.7                   | 3.9                |
| C-12a              | 142.1                    | 141.2                   | 0.9                |
| C-3                | 141.5                    | 145.6                   | 4.1                |
| C-2                | 130.3                    | 129.1                   | 1.2                |
| C-5                | 127.4                    | 125.6                   | 1.8                |
| C-6                | 124.4                    | 125.3                   | 0.9                |
| C-12               | 123.9                    | 117.3                   | 6.6                |
| C-3a               | 121.9                    | 127.6                   | 5.7                |
| C-7                | 118.7                    | 115.5                   | 3.2                |
| C-4                | 118.6                    | 122.1                   | 3.5                |
| C-10               | 117.6                    | 119.3                   | 1.7                |
| C-8a               | 110.0                    | 111.7                   | 1.7                |
| C-7                | 74.4                     | 71.9                    | 2.5                |
| 11-CH <sub>3</sub> | 21.7                     | 19.6                    | 2.1                |
| H-7                | 6.49                     | 6.73                    | 0.24               |
| H-5                | 7.90                     | 7.79                    | 0.11               |
| H-6                | 7.29                     | 7.34                    | 0.05               |
| H-7                | 7.38                     | 7.57                    | 0.19               |
| H-10               | 6.78                     | 6.97                    | 0.19               |
| 11-CH <sub>3</sub> | 2.33                     | 2.32                    | 0.01               |
| 11-CH <sub>3</sub> | 2.33                     | 2.32                    | 0.01               |
| 11-CH <sub>3</sub> | 2.33                     | 2.32                    | 0.01               |

**Table S18.** NMR Data (DMSO-*d*<sub>6</sub>, at 300 K) and <sup>1</sup>H-<sup>13</sup>C HMBC correlations (incl. long-range correlations based on modified HMBC pulse sequences) for the revised structure of maduralactomycin A.<sup>a,15</sup>

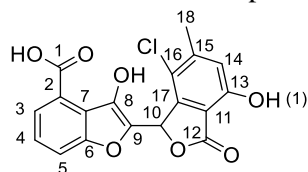

revised maduralactomycin A (1)

| position | $\delta_C$ , mult. <sup>b</sup> | $\delta_H$ , mult. ( <i>J</i> in Hz) | maduralactomycin A <sup>15</sup>    |                                                                         |
|----------|---------------------------------|--------------------------------------|-------------------------------------|-------------------------------------------------------------------------|
|          |                                 |                                      | <sup>1</sup> H- <sup>1</sup> H COSY | <sup>1</sup> H- <sup>13</sup> C HMBC<br>(incl. long-range correlations) |
| 1        | 170.6, qC                       |                                      |                                     |                                                                         |
| 2        | 127.6, qC                       |                                      |                                     |                                                                         |
| 3        | 125.5, CH                       | 7.79, d, 7.5                         | 4                                   | 1, 4, 5, 6, 7                                                           |
| 4        | 125.2, CH                       | 7.34, t, 7.5                         | 3, 5                                | 2, 3, 6                                                                 |
| 5        | 115.2, CH                       | 7.57, d, 7.5                         | 4                                   | 4, 6, 7                                                                 |
| 6        | 152.6, qC                       |                                      |                                     |                                                                         |
| 7        | 122.0, qC                       |                                      |                                     |                                                                         |
| 8        | 141.3, qC                       |                                      |                                     |                                                                         |
| 9        | 129.0, qC                       |                                      |                                     |                                                                         |
| 10       | 71.8, CH                        | 6.74, s                              |                                     | 8, 9, 11, 12, 13, 16, 17                                                |
| 11       | 117.2, qC                       |                                      |                                     |                                                                         |
| 12       | 166.7, qC                       |                                      |                                     |                                                                         |
| 13       | 155.3, qC                       |                                      |                                     |                                                                         |
| 14       | 119.2, CH                       | 6.97, s                              | 18                                  | 11, 12, 13, 16, 17, 18                                                  |
| 15       | 144.3, qC                       |                                      |                                     |                                                                         |
| 16       | 111.7, qC                       |                                      |                                     |                                                                         |
| 17       | 145.5, qC                       |                                      |                                     |                                                                         |
| 18       | 19.6, CH <sub>3</sub>           | 2.32, s                              | 14                                  | 11, 12, 14, 15, 16                                                      |
| OH (1)   |                                 | 11.07, s                             |                                     | 13, 14, 16, 17                                                          |

<sup>a</sup> 600 MHz for <sup>1</sup>H NMR and 150 MHz for <sup>13</sup>C NMR

<sup>b</sup> numbers of attached protons were determined by analysis of 2D spectra.

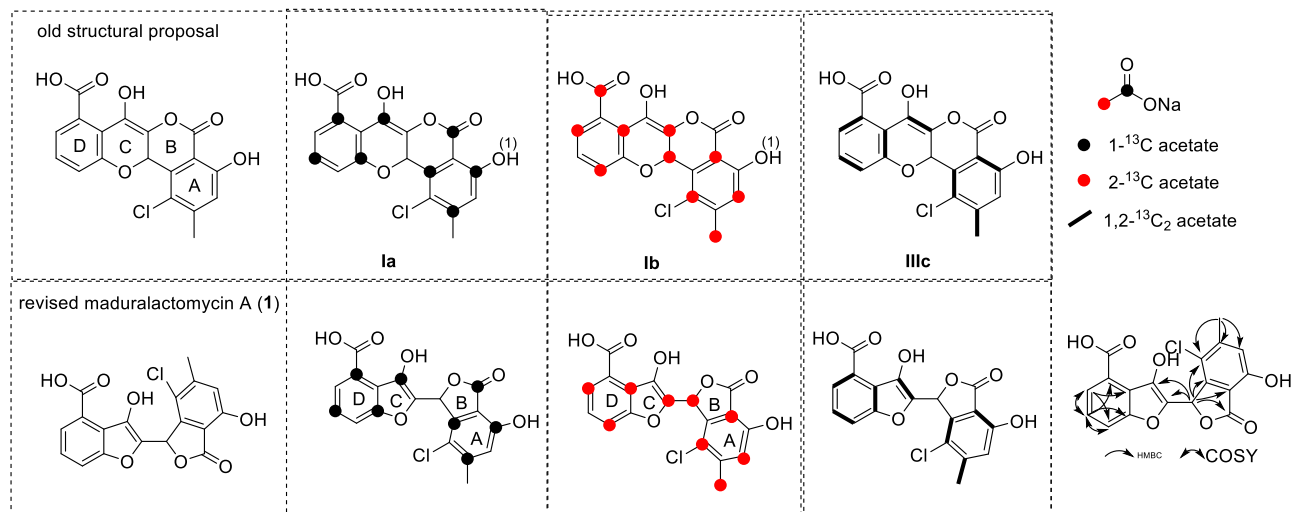

**Figure S34.** Reassignment of  $^{13}\text{C}$ -labeling for revised structure of maduralactomycin.<sup>15</sup> A) 1- $^{13}\text{C}$  labeled maduralactomycin A: HRMS analysis showed an increase of the corresponding molecular isotope peak ( $m/z$  value) that indicated the incorporation of up to eight  $^{13}\text{C}$  acetate units.  $^{13}\text{C}$  NMR analysis revealed a signal enhancement of C-2, C-4, C-6, C-8, C-12, C-13, C-15 and C-17. B) 2- $^{13}\text{C}$  labeled maduralactomycin A: HRMS analysis showed an increase of the corresponding molecular isotope peak ( $m/z$  value) that indicated the incorporation of up to ten  $^{13}\text{C}$  acetate units.  $^{13}\text{C}$  NMR analysis of 1b revealed the strong signal enhancement of C-1, C-3, C-5, C-7, C-9, C-10, C-11, C-14, C-16, and C-18. C) 1,2- $^{13}\text{C}_2$  labeled maduralactomycin A: HRMS analysis showed an increase of the corresponding molecular isotope peak ( $m/z$  value) that indicated the incorporation of up to nine or ten  $^{13}\text{C}$  acetate units.  $^1\text{H}$  NMR spectrum was identical with spectra of 1a and 1b. 2D NMR analysis of 1c allowed the assignment of the complete structure. Detailed analysis of  $^{13}\text{C}$  NMR revealed the doublet originated from the intact acetate unit, however singlet of C-1, C10, C-12 and C-14 from either rearrangement or decarboxylation.

**Table S19.** Revised NMR Data (DMSO-*d*<sub>6</sub>, at 300 K) and <sup>1</sup>H-<sup>13</sup>C HMBC correlations (incl. long-range correlations based on modified HMBC pulse sequences) of 1-<sup>13</sup>C labeled maduralactomycin A (**1a**).<sup>a, 15</sup> HRMS analysis showed an increase of the corresponding molecular isotope peak (*m/z* value) that indicated the incorporation of up to eight <sup>13</sup>C acetate units. <sup>13</sup>C NMR analysis revealed a signal enhancement of **C-2, C-4, C-6, C-8, C-12, C-13, C-15** and **C-17**.

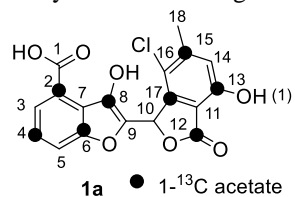

| 1- <sup>13</sup> C labeled maduralactomycin A ( <b>1a</b> ) <sup>15</sup> |                                     |                                          |      |                                         |
|---------------------------------------------------------------------------|-------------------------------------|------------------------------------------|------|-----------------------------------------|
| position                                                                  | δ <sub>C</sub> , mult. <sup>b</sup> | δ <sub>H</sub> , mult. ( <i>J</i> in Hz) | COSY | HMBC<br>(incl. long-range correlations) |
| 1                                                                         | <b>168.9, qC</b>                    |                                          |      |                                         |
| 2                                                                         | 132.6, qC                           |                                          |      |                                         |
| 3                                                                         | <b>124.5, CH</b>                    | <b>7.65, d, 7.7</b>                      | 4    | 1, 4, 6, 8                              |
| 4                                                                         | 124.5, CH                           | 7.22, t, 7.7                             | 3, 5 | 2, 6                                    |
| 5                                                                         | <b>113.0, CH</b>                    | <b>7.33, d, 7.7</b>                      | 4    | 2, 4, 6                                 |
| 6                                                                         | 152.6, qC                           |                                          |      |                                         |
| 7                                                                         | n.d.                                |                                          |      |                                         |
| 8                                                                         | 142.9, qC                           |                                          |      |                                         |
| 9                                                                         | n.d.                                |                                          |      |                                         |
| 10                                                                        | <b>72.4, CH</b>                     | <b>6.66, s</b>                           |      | 8, 12, 17                               |
| 11                                                                        | <b>111.8, qC</b>                    |                                          |      |                                         |
| 12                                                                        | 167.0, qC                           |                                          |      |                                         |
| 13                                                                        | 155.7, qC                           |                                          |      |                                         |
| 14                                                                        | <b>119.3, CH</b>                    | <b>6.94, s</b>                           | 18   | 11, 12, 13, 16, 17, 18                  |
| 15                                                                        | 144.4, qC                           |                                          |      |                                         |
| 16                                                                        | <b>116.9, qC</b>                    |                                          |      |                                         |
| 17                                                                        | 145.7, qC                           |                                          |      |                                         |
| 18                                                                        | <b>19.6, CH<sub>3</sub></b>         | <b>2.30, s</b>                           | 14   | 15, 16                                  |

<sup>a</sup> 600 MHz for <sup>1</sup>H NMR and 150 MHz for <sup>13</sup>C NMR; red highlight indicated very weak signals.

<sup>b</sup> numbers of attached protons were determined by analysis of 2D spectra.

**Table S20.** Revised NMR data (DMSO-*d*<sub>6</sub>, at 300 K) and <sup>1</sup>H-<sup>13</sup>C HMBC correlations (incl. long-range correlations based on modified HMBC pulse sequences) of 2-<sup>13</sup>C labeled maduralactomycin A (**1b**).<sup>a,15</sup> HRMS analysis showed an increase of the corresponding molecular isotope peak (*m/z* value) that indicated the incorporation of up to ten <sup>13</sup>C acetate units. <sup>13</sup>C NMR analysis of **1b** revealed the strong signal enhancement of **C-1, C-3, C-5, C-7, C-9, C-10, C-11, C-14, C-16, and C-18**.

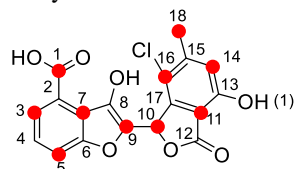

**1b** ● 2-<sup>13</sup>C acetate S

| 2- <sup>13</sup> C labeled maduralactomycin A ( <b>1b</b> ) <sup>15</sup> |                                     |                                          |      |                                         |
|---------------------------------------------------------------------------|-------------------------------------|------------------------------------------|------|-----------------------------------------|
| position                                                                  | δ <sub>C</sub> , mult. <sup>b</sup> | δ <sub>H</sub> , mult. ( <i>J</i> in Hz) | COSY | HMBC<br>(incl. long-range correlations) |
| 1                                                                         | 168.7, qC                           |                                          |      |                                         |
| 2                                                                         | <b>132.6, qC</b>                    |                                          |      |                                         |
| 3                                                                         | 124.5, CH                           | 7.64, d, 7.7                             | 4    | 1, 5, 7                                 |
| 4                                                                         | n.d.                                | 7.21, t, 7.7                             | 3, 5 | 2, 3, 6                                 |
| 5                                                                         | 113.0, CH                           | 7.32, d, 7.7                             | 4    | 3, 7                                    |
| 6                                                                         | <b>152.6, qC</b>                    |                                          |      |                                         |
| 7                                                                         | 122.5, qC                           |                                          |      |                                         |
| 8                                                                         | n.d.                                |                                          |      |                                         |
| 9                                                                         | 126.9, qC                           |                                          |      |                                         |
| 10                                                                        | 72.5, CH                            | 6.65, s                                  |      | 9, 11, 16, 17                           |
| 11                                                                        | 111.8, qC                           |                                          |      |                                         |
| 12                                                                        | n.d.                                |                                          |      |                                         |
| 13                                                                        | n.d.                                |                                          |      |                                         |
| 14                                                                        | 119.4, CH                           | 6.93, s                                  |      | 11, 16, 18                              |
| 15                                                                        | <b>144.4, qC</b>                    |                                          |      |                                         |
| 16                                                                        | 116.7, qC                           |                                          |      |                                         |
| 17                                                                        | <b>145.7, qC</b>                    |                                          |      |                                         |
| 18                                                                        | 19.7, CH <sub>3</sub>               | 2.30, s                                  |      | 14, 15, 16                              |

<sup>a</sup> 600 MHz for <sup>1</sup>H NMR and 150 MHz for <sup>13</sup>C NMR; red highlight indicated very weak signals.

<sup>b</sup> numbers of attached protons were determined by analysis of 2D spectra.



**Table S21.** Revised NMR data (DMSO-*d*<sub>6</sub>, at 300 K) and <sup>1</sup>H-<sup>13</sup>C HMBC correlations (incl. long-range correlations based on modified HMBC pulse sequences) of 1,2-<sup>13</sup>C<sub>2</sub> labeled maduralactomycin A (**1c**).<sup>a</sup> HRMS analysis showed an increase of the corresponding molecular isotope peak (*m/z* value) that indicated the incorporation of up to nine or ten <sup>13</sup>C acetate units. <sup>1</sup>H NMR spectrum was identical with spectra of **1a** and **1b**. 2D NMR analysis of **1c** allowed the assignment of the complete structure. Detailed analysis of <sup>13</sup>C NMR revealed the doublet originated from the intact acetate unit, however singlet of C-1, C10, C-12 and C-14 from either rearrangement or decarboxylation.

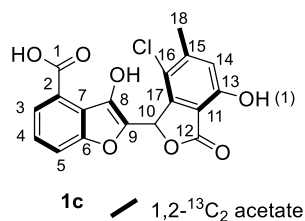

| 1,2- <sup>13</sup> C <sub>2</sub> labeled maduralactomycin A ( <b>1c</b> ) <sup>15</sup> |                                                       |                                          |      |                                      |
|------------------------------------------------------------------------------------------|-------------------------------------------------------|------------------------------------------|------|--------------------------------------|
| position                                                                                 | δ <sub>C</sub> , mult. <sup>b</sup> ( <i>J</i> in Hz) | δ <sub>H</sub> , mult. ( <i>J</i> in Hz) | COSY | HMBC (incl. long-range correlations) |
| 1                                                                                        | 168.9, qC, s                                          |                                          |      |                                      |
| 2                                                                                        | 132.5, qC, d (59)                                     |                                          |      |                                      |
| 3                                                                                        | 124.4, CH, d, (60)                                    | 7.63, d (7.4)                            | 4    | 1, 5, 7                              |
| 4                                                                                        | 124.1, CH, d (56)                                     | 7.18, t (7.8)                            | 3, 5 | 2, 6                                 |
| 5                                                                                        | 112.8, CH, d (58)                                     | 7.31, d (8.3)                            | 4    | 6, 7                                 |
| 6                                                                                        | 152.3, qC, d (58)                                     |                                          |      |                                      |
| 7                                                                                        | 122.7, qC, d (58)                                     |                                          |      |                                      |
| 8                                                                                        | 141.9, qC, d (95)                                     |                                          |      |                                      |
| 9                                                                                        | 128.7, qC, d (95)                                     |                                          |      |                                      |
| 10                                                                                       | 71.2, CH, s                                           | 6.31, s                                  |      | 12, 16, 17                           |
| 11                                                                                       | 109.7, qC, d (64)                                     |                                          |      |                                      |
| <b>12</b>                                                                                | <b>172.1, qC, s</b>                                   |                                          |      |                                      |
| <b>13</b>                                                                                | <b>171.0, qC, d (64)</b>                              |                                          |      |                                      |
| 14                                                                                       | 124.7, CH, s                                          | 6.17, s                                  | 18   | 11, 12, 16, 18                       |
| 15                                                                                       | 142.4, qC, d (44)                                     |                                          |      |                                      |
| 16                                                                                       | 104.3, qC, d (78)                                     |                                          |      |                                      |
| 17                                                                                       | 145.0, qC, d (76)                                     |                                          |      |                                      |
| 18                                                                                       | 19.8, CH <sub>3</sub> , d (44)                        | 2.08, s                                  | 14   | 14, 15, 16                           |
| 8-OH                                                                                     |                                                       | 16.3, br s                               |      | 7, 8, 9                              |

<sup>a</sup> 600 MHz for <sup>1</sup>H NMR and 150 MHz for <sup>13</sup>C NMR; red highlight indicated very weak signals.

<sup>b</sup> numbers of attached protons were determined by analysis of 2D spectra.

## Biological Activity Tests

**Antimicrobial tests:** The activity assay was done by the broth dilution method according to the NCCLS (National Committee for Clinical Laboratory Standards).

**Table S22** Antimicrobial activity of seongomycin (1.0 mg/mL in DMSO), ciprofloxacin (5 µg/mL in aqua dest. (cip.) and amphotericin B (10 µg/mL in DMSO/MeOH (amp.) towards Gram (+) and Gram (-) bacteria and fungi.<sup>a</sup>

| compd.            | <i>B. subtilis</i><br>6633 | <i>S. aureus</i><br>SG51<br>1 | <i>E. coli</i><br>SG45<br>8 | <i>P. aeruginosa</i><br>SG137 | <i>MRSA</i><br><i>S. aureus</i><br>134/94 | <i>VRSA</i><br><i>E. faecalis</i> | <i>M. vaccae</i><br>10670 | <i>S. salm-<br/>onic.</i><br>549 | <i>C. albicans</i> | <i>P. notatum</i><br>JP36 |
|-------------------|----------------------------|-------------------------------|-----------------------------|-------------------------------|-------------------------------------------|-----------------------------------|---------------------------|----------------------------------|--------------------|---------------------------|
| seongomycin       | 0                          | 0                             | 0                           | 0                             | 0                                         | 0/A                               | 18p                       | 20(p)                            | 12P                | 14                        |
| DMSO<br>(control) | 11P                        | 11P                           | 12P                         | 12P                           | 0                                         | 11P                               | 11p                       | 12P                              | 0                  | 12p                       |
| cip.              | 27                         | 17                            | 23/31<br>p                  | 24                            | 0                                         | 15F                               | 20p                       | -                                | -                  | -                         |
| amp.              | -                          | -                             | -                           | -                             | -                                         | -                                 | -                         | 17p                              | 20                 | 18p                       |

<sup>a</sup>: The value indicated the diameter of inhibition zone (in mm), (p) some colonies in inhibition zone, p colonies in inhibition zone, P many colonies in inhibition zone, A Indication of inhibition, F growth stimulating

**Table S23** Minimal inhibitory contentraion (MIC) assay of seongomycin. All used substances were diluted to a concentration of 100 µg/mL. Used solvents and respective MIC of the Test stains are given in the table. All values are given in µg/mL

| Substance       | Solvent          | <i>C. albicans</i> | <i>S. salmonic.</i><br>549 | <i>P. notatum</i><br>JP36 | <i>M. vaccae</i><br>10670 |
|-----------------|------------------|--------------------|----------------------------|---------------------------|---------------------------|
| Seongomycin     | MeOH             | 50                 | 50                         | >100                      | 100                       |
| Amphotericin B  | DMSO/MeOH        | 0.2                | 0.1                        | >100                      | -                         |
| Ciprofloxacin   | H <sub>2</sub> O | -                  | -                          | -                         | 0.2                       |
| Solvent control | MeOH             | 100                | 100                        | >100                      | >100                      |

## **Cytotoxicity and the antiproliferative activity**

**Cells and culture conditions for cytological assays:** Cells were grown in the appropriate cell culture medium supplemented with 10 mL L-glutamine 1 (CAMBREX 17-605E/U1), 550  $\mu\text{L}$  / L (50 mg/mL) gentamicin sulfate (CAMBREX 17-518Z), and 10 % heat inactivated fetal bovine serum (GIBCO Life Technologies 10270-106) at 37 °C in 5 %  $\text{CO}_2$  in high density polyethylene flasks (NUNC 156340).

**Proliferation assay:** The test substances were dissolved in DMSO before being diluted in cell culture medium. The adherent cells were harvested at the logarithmic growth phase after soft trypsinization using 0.25 % trypsin in PBS containing 0.02 % EDTA (Biochrom KG L2163). For each experiment, approximately 10,000 cells were seeded with 0.1 mL culture medium per well of the 96-well microplates (HUVEC: flat bottomed NUNC 167008, K-562: round bottomed NUNC 163320). To test the antiproliferative effect of natural products on HUVEC and K-562, the cells were incubated for 72 hours in plates prepared with control and different dilutions of test substances. The GI50 values were defined as being where the inhibition of proliferation is 50 % compared to untreated control.

**Cytotoxicity assay:** For the cytotoxicity assay, HeLa cells were preincubated for 48 hours without the test substances. To test the cytotoxic effect of natural products on HeLa, the dilutions of the compounds were carried out carefully on the subconfluent monolayers of HeLa cells after the preincubation time. After incubation time, the cytolytic effect of compounds were analysed in compare to negative control. The 50 % cytotoxicity concentration (CC50) was defined as the test compound concentration required for destruction in 50 % of the cell monolayer compared to untreated control.

**Condition of incubation:** The cells were incubated with dilutions of the natural products in microplates for 72 hours at 37 °C in a humidified atmosphere and 5 %  $\text{CO}_2$ . This incubation was found to be an optimum time for the evaluation of the cytotoxicity and the inhibition of cell proliferation by finding out the number of viable cells stained with CellTiter-Blue® reagent or methylene blue.

**Methods of evaluation:** For estimating the influence of natural products on cell proliferation of K-562, we determine the numbers of viable cells present in multiwell plates via CellTiter-Blue® assay (PROMEGA). It uses the indicator dye resazurin to measure the metabolic capacity of cells as indicator of cell viability. Viable cells of untreated control retain the ability to reduce resazurin into resorufin, whereas nonviable cells rapidly lose metabolic capacity and do not reduce the indicator dye. The absorption maximum for resazurin is 605 nm and the absorption maximum for resorufin is 573 nm. Thus, the absorbance measurements at 570 nm and using 600 nm as a reference wavelength can be used to monitor results. Values are compared to blank well containing CellTiter-Blue® reagent without cells. The adherent HUVEC and HeLa cells were fixed by glutaraldehyde (MERCK 1.04239.0250) and stained with a 0.05 % solution of methylene blue (SERVA 29198) for 15 min. After gently washing, the stain was eluted by 0.2 mL of 0.33 N HCl in the wells. The optical densities were measured at 660 nm (methylene blue) in SUNRISE microplate reader (TECAN). Under our experimental conditions, the signals from the methylene blue and CellTiter-Blue® reagent are proportional to the number of viable cells. A repeat determination has been conducted in all experiments, four replicates were assayed. The calculations of the different values of GI50 and CC50 were performed with the software Magellan (TECAN).

**Table S24.** Used cell lines and cell culture media for cytotoxicity and proliferation assays

| Cell line                  | Cell culture medium         |
|----------------------------|-----------------------------|
| HUVEC (ATCC CRL-1730) DMEM | CAMBREX 12-614F             |
| K-562 (DSM ACC 10)         | RPMI 1640 (CAMBREX 12-167F) |
| HeLa (DSM ACC 57)          | RPMI 1640 (CAMBREX 12-167F) |

**Table S25.** Antiproliferative and cytotoxic activity test of seongomycin

| HKI- oder sonst. Nr. | Antiproliferative Effect          |                                   | Cytotoxicity                     | Solubility |
|----------------------|-----------------------------------|-----------------------------------|----------------------------------|------------|
|                      | HUVEC<br>GI <sub>50</sub> [µg/ml] | K-562<br>GI <sub>50</sub> [µg/ml] | HeLa<br>CC <sub>50</sub> [µg/ml] |            |
| Seongomycin          | > 50                              | > 50                              | 20,9 (± 0,7)                     | DMSO       |

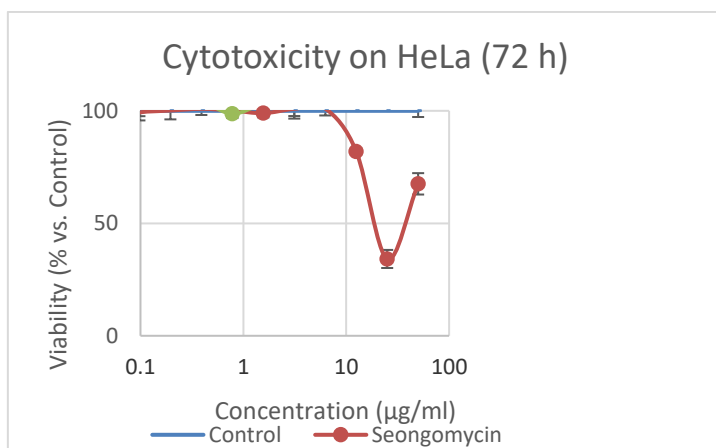

**Figure S35.** Graphic representation of cytotoxicity of seongomycin. On the Y axis the viability of cells in % and on the X-axis the concentration of the compound is depicted. <sup>16</sup>

## Cytotoxicity Assays (Vero E6 and HuH7 5.2 cells)

SEONGOMYCIN (50 – 1.3 $\mu$ M) CYTOTOXICITY PROTOCOL: HuH7 5.2 cells or Vero E6 cells (20,000 cells in 100 $\mu$ L DMEM supplemented with 10% FBS) were seeded directly into each well of a 96 well plate. Cells were incubated at 37 °C, 5% CO<sub>2</sub> with humidified atmosphere for 24h to allow to adherence. Overnight culture media was removed and replaced with 199 $\mu$ L and subsequently treated with 1 $\mu$ L of DMSO-diluted Seongomycin or control substance cis-Diamminplatin(II)-dichlorid (cytotoxic molecule). Cells were incubated with the compounds at 37 °C, 5% CO<sub>2</sub> with humidified atmosphere for 72h before measuring cytotoxicity (cell viability detection) using CellTiter-Glo® Assay. Assay Volume = 200 $\mu$ l; Assay concentration= (50 – 1.3  $\mu$ M).

SEONGOMYCIN (100 – 0.3 $\mu$ M) CYTOTOXICITY PROTOCOL: HuH7. 5.2 cells or Vero E6 cells (20,000 cells in 100 $\mu$ L DMEM supplemented with 10% FBS) were seeded directly into each well of a 96 well plate. Cells were incubated at 37 °C, 5% CO<sub>2</sub> with humidified atmosphere for 24h to allow to adherence. Overnight culture media was removed and replaced with 100 $\mu$ L of media (DMEM-10% FBS) containing serially diluted compounds (100 – 0.3 $\mu$ M). Cells were incubated with the compounds at 37 °C, 5% CO<sub>2</sub> with humidified atmosphere for 48h before measuring cytotoxicity (cell viability detection) using CellTiter-Glo® Assay. Assay Volume = 90 $\mu$ l; Assay concentration= (100 – 0.3 $\mu$ M).

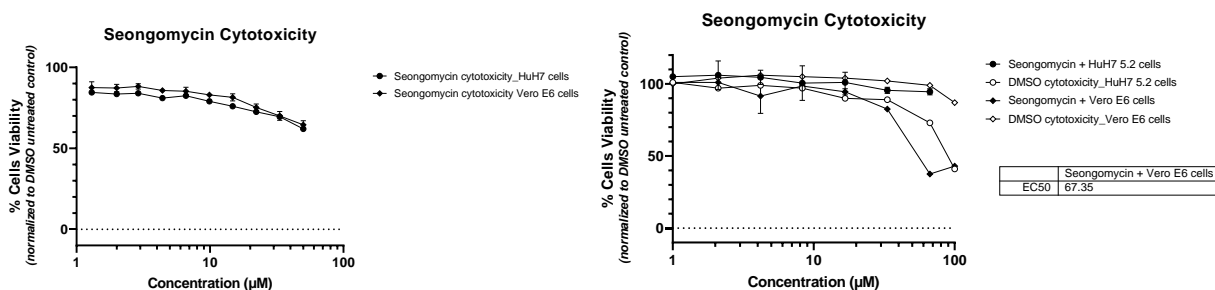

**Figure S36.** Determination of the C<sub>50</sub> of seongomycin in HuH7 and Vero E6 cells (67.4  $\mu$ M in Vero E6 cells; > 100 $\mu$ M in HuH7 5.2 cells).

## Antiviral Assays (HuH7 5.2 cells + CHIKV; Vero E6 cells + SARS-CoV2)

SEONGOMYCIN (50 – 1.3 $\mu$ M) PRE-INFECTION & POST INFECTION TREATMENT PROTOCOL: HuH7 5.2 cells or Vero E6 cells (20,000 cells in 194 $\mu$ L DMEM supplemented with 10% FBS) were seeded directly into each well of a 96 well plate. Cells were incubated at 37 °C, 5% CO<sub>2</sub> with humidified atmosphere for 24h to allow to adherence. Cells were treated with 1 $\mu$ L Seongomycin diluted in 100% DMSO or control compounds (Ribavirin for CHIKV screen and Paxlovid or Remdesivir for SARS-CoV2 screen) in 10-dose response to yield assay concentration in the range (50 – 1.3 $\mu$ M) or mock-treated with 1 $\mu$ L of media containing the same concentration of DMSO (post-infection treatment condition). Cells were incubated for 1-2h with the compounds before infection. Subsequently, cells were infected by adding 5 $\mu$ L of virus inoculum (CHIKV or SARS-CoV2 diluted in media to yield MOI 0.1) into the pre-incubation media. Cells +/- compounds + virus were incubated for 1h to allow virus infection. The virus inoculum was removed, and the cell monolayer washed twice with warm PBS to remove nonabsorbed virus. Cells in the pre-infection treatment condition and post-infection treatment condition were replenished with 200 $\mu$ L and 199 $\mu$ L DMEM supplemented with 10% FBS respectively. Cells in the post-infection treatment condition were subsequently treated with 1 $\mu$ L of the test compounds in 10-dose response (50 – 1.3 $\mu$ M).

Plate(s) were incubated at 37 °C, 5% CO<sub>2</sub> with humidified atmosphere for 72h before measuring virus infectivity (cell viability detection) using CellTiter-Glo Assay. Assay Volume = 200µl; Assay concentration= (50 - 1.3 µM).

**SEONGOMYCIN (100 – 0.3µM) PRE-INFECTION and POST INFECTION TREATMENT PROTOCOL:**

HuH7. 5.2 cells (20,000 cells in 100µL DMEM supplemented with 10% FBS) were seeded directly into each well of a 96 well plate. Cells were incubated at 37 °C, 5% CO<sub>2</sub> with humidified atmosphere for 24h to allow to adherence. Overnight culture media was removed, and cells in the pre-infection treatment condition replenished with 45µL of media (DMEM-10% FBS) containing Seongomycin or control compounds (Ribavirin or Chloroquine) serially diluted in media without DMSO in 10-dose response (100 – 0.3 µM). Alternatively, cells in the post-infection treatment condition were replenished with media containing DMSO serially diluted in media supplemented with 10% FBS in 10-dose response (1 – 0.003%). Cells were incubated with the compounds for 1-2h before infection. Subsequently, cells were infected by adding 5µL of virus inoculum (CHIKV diluted in FBS-free media to yield MOI 0.1) into the pre-incubation media. Cells +/- compounds + virus were incubated for 1h to allow virus infection. The virus inoculum was removed, and the cell monolayer washed twice with warm PBS to remove nonabsorbed virus. Cells in the pre-infection treatment condition were replenished with 90µL media supplemented with 10% FBS. Subsequently, cells in the post-infection treatment condition were treated by adding 90 µL of media containing Seongomycin or control compounds (Ribavirin or Chloroquine) serially diluted in media without DMSO in 10-dose response (100 – 0.3µM). Plates were incubated at 37 °C, 5% CO<sub>2</sub> with humidified atmosphere for 48h before measuring virus infectivity (cell viability detection) using CellTiter-Glo® Assay (Assay Volume = 90 µl; Assay concentration (100 – 0.3µM)).

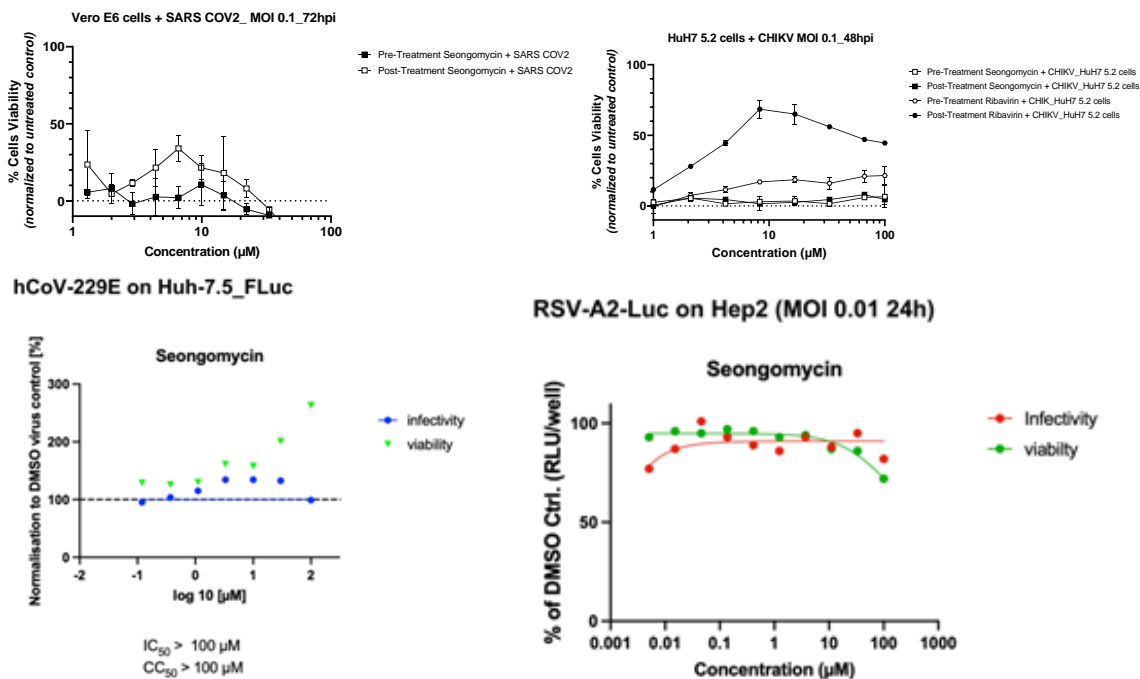

**Figure S37.** Determination of antiviral activity against SARS-CoV2 or CHIKV when applied to virus-infected cells, either in pre-infection or post-infection treatment conditions.

## References

---

- <sup>1</sup> Bilyk, O.; Sekurova, O. N.; Zotchev, S. B.; Luzhetskyy, A., Cloning and heterologous expression of the greccocycline biosynthetic gene cluster. *PloS one* **2016**, *11* (7), e0158682
- <sup>2</sup> Shirling, E. B.; Gottlieb, D., Methods for characterization of *Streptomyces* species. *International Journal of Systematic and Evolutionary Microbiology* **1966**, *16*, 313-340
- <sup>3</sup> Chater, K. F.; Wilde, L., Restriction of a bacteriophage of *Streptomyces albus* G involving endonuclease Sall. *Journal of bacteriology* **1976**, *128* (2), 644-650.
- <sup>4</sup> Chater, K. F.; Wilde, L. C., *Streptomyces albus* G Mutants Defective in the SalGI Restriction-Modification System. *Microbiology* **1980**, *116* (2), 323-334.
- <sup>5</sup> Gomez - Escribano, J. P.; Bibb, M. J., Engineering *Streptomyces coelicolor* for heterologous expression of secondary metabolite gene clusters. *Microbial biotechnology* **2011**, *4* (2), 207-215.
- <sup>6</sup> Hopwood, D. A.; Kieser, T.; Wright, H. M.; Bibb, M. J., Plasmids, Recombination and Chromosome Mapping in *Streptomyces lividans* 66. *Microbiology* **1983**, *129* (7), 2257-2269.
- <sup>7</sup> Figurski, D. H.; Helinski, D. R., Replication of an origin-containing derivative of plasmid RK2 dependent on a plasmid function provided in trans. *Proceedings of the National Academy of Sciences* **1979**, *76* (4), 1648-1652.
- <sup>8</sup> Ditta, G.; Stanfield, S.; Corbin, D.; Helinski, D. R., Broad host range DNA cloning system for gram-negative bacteria: construction of a gene bank of *Rhizobium meliloti*. *Proceedings of the National Academy of Sciences* **1980**, *77* (12), 7347-7351.
- <sup>9</sup> Paget, M. S.; Chamberlin, L.; Atrih, A.; Foster, S. J.; Buttner, M. J., Evidence that the extracytoplasmic function sigma factor  $\zeta$ E is required for normal cell wall structure in *Streptomyces coelicolor* A3 (2). *Journal of bacteriology* **1999**, *181* (1), 204-211.
- <sup>10</sup> MacNeil, D. J.; Gewain, K. M.; Ruby, C. L.; Dezeny, G.; Gibbons, P. H.; MacNeil, T., Analysis of *Streptomyces avermitilis* genes required for avermectin biosynthesis utilizing a novel integration vector. *Gene* **1992**, *111* (1), 61-68.
- <sup>11</sup> Gust, B.; Challis, G. L.; Fowler, K.; Kieser, T.; Chater, K. F., PCR-targeted *Streptomyces* gene replacement identifies a protein domain needed for biosynthesis of the sesquiterpene soil odor geosmin. *Proceedings of the National Academy of Sciences* **2003**, *100* (4), 1541-1546.
- <sup>12</sup> Gust, B.; Challis, G. L.; Fowler, K.; Kieser, T.; Chater, K. F., PCR-targeted *Streptomyces* gene replacement identifies a protein domain needed for biosynthesis of the sesquiterpene soil odor geosmin. *Proceedings of the National Academy of Sciences* **2003**, *100* (4), 1541-1546.
- <sup>13</sup> Datsenko, K. A.; Wanner, B. L., One-step inactivation of chromosomal genes in *Escherichia coli* K-12 using PCR products. *Proceedings of the National Academy of Sciences* **2000**, *97* (12), 6640-6645.
- <sup>14</sup> Carney, J., R.; Hong, S.-Tshool; Gould, S., J., *Tetrahedron Letters* 1997, *38*, 3139-3142.
- <sup>15</sup> H. Guo, J. W. Schwitalla, R. Benndorf, M. Baunach, C. Steinbeck, H. Görls, Z. W. de Beer, L. Regestein, C. Beemelmans, *Org. Lett.* 2020, **22**, 2634-2638.
- <sup>16</sup> Zehra A, Hashmi MZ, Khan AM, Malik T, Abbas Z. Biphasic Dose–Response Induced by PCB150 and PCB180 in HeLa Cells and Potential Molecular Mechanisms. *Dose-Response*. 2020;18(1). doi:10.1177/1559325820910040
